# Supplementary material for: Determinants of fatty acid content and composition of human milk fed to infants born weighing <1250 g
Source: PubMed Central journal article supplement — Am J Clin Nutr. 2021 Jul 13;114(4):1523–34. doi: 10.1093/ajcn/nqab222 (PMC8488876; doi:10.1093/ajcn/nqab222), 2021-07-13

Supplementary Material

**Supplementary TABLE 1** – Detailed Results: Determinants of fat and fatty acid content of mother’s milk – unadjusted  $\beta$  estimates (SDS) and 95% CI <sup>1</sup>

|                       |                  | Infant Characteristics (95% CI)  |                     |                             |                             |                                     |
|-----------------------|------------------|----------------------------------|---------------------|-----------------------------|-----------------------------|-------------------------------------|
|                       |                  | Gestational Age at Birth (weeks) | Infant Sex (vs F)   | Birth Weight (/100g)        | Lactation Stage (week)      | Multiple birth (multiple vs single) |
|                       | <b>Total Fat</b> | -0.02 (-0.06, 0.03)              | 0.06 (-0.15, 0.27)  | -0.03 (-0.08, 0.02)         | <b>0.06 (0.02, 0.10)</b>    | <b>-0.25 (-0.50, 0.00)</b>          |
| Saturated fats (mol%) | <b>10:0</b>      | 0.02 (-0.03, 0.08)               | 0.22 (-0.02, 0.47)  | 0.00 (-0.06, 0.06)          | <b>-0.05 (-0.10, -0.01)</b> | -0.25 (-0.54, 0.04)                 |
|                       | <b>12:0</b>      | <b>-0.07 (-0.11, -0.02)</b>      | -0.03 (-0.25, 0.19) | <b>-0.06 (-0.11, -0.01)</b> | <b>-0.06 (-0.10, -0.02)</b> | <b>-0.50 (-0.76, -0.24)</b>         |
|                       | <b>14:0</b>      | <b>-0.07 (-0.12, -0.03)</b>      | 0.00 (-0.23, 0.23)  | -0.05 (-0.10, 0.01)         | <b>-0.07 (-0.11, -0.03)</b> | <b>-0.51 (-0.78, -0.24)</b>         |
|                       | <b>16:0</b>      | 0.02 (-0.03, 0.06)               | 0.14 (-0.08, 0.36)  | 0.01 (-0.04, 0.07)          | -0.03 (-0.07, 0.00)         | <b>-0.38 (-0.63, -0.13)</b>         |
|                       | <b>18:0</b>      | -0.01 (-0.06, 0.04)              | 0.14 (-0.09, 0.36)  | 0.03 (-0.03, 0.08)          | <b>0.04 (0.00, 0.08)</b>    | 0.00 (-0.27, 0.27)                  |
|                       | <b>20:0</b>      | -0.01 (-0.05, 0.04)              | 0.08 (-0.15, 0.30)  | 0.01 (-0.04, 0.07)          | -0.02 (-0.05, 0.02)         | 0.00 (-0.27, 0.27)                  |
|                       | <b>21:0</b>      | <b>0.07 (0.01, 0.12)</b>         | 0.03 (-0.22, 0.28)  | <b>0.07 (0.01, 0.13)</b>    | 0.01 (-0.03, 0.05)          | <b>0.30 (0.00, 0.59)</b>            |
|                       | <b>22:0</b>      | 0.00 (-0.04, 0.04)               | -0.04 (-0.23, 0.14) | 0.01 (-0.04, 0.05)          | 0.00 (-0.03, 0.04)          | -0.13 (-0.35, 0.10)                 |
|                       | <b>23:0</b>      | 0.01 (-0.03, 0.06)               | 0.11 (-0.11, 0.32)  | 0.03 (-0.02, 0.09)          | <b>-0.06 (-0.09, -0.02)</b> | 0.08 (-0.19, 0.35)                  |
|                       | <b>24:0</b>      | -0.01 (-0.06, 0.04)              | 0.09 (-0.13, 0.32)  | -0.04 (-0.09, 0.02)         | <b>-0.18 (-0.21, -0.15)</b> | -0.26 (-0.54, 0.02)                 |

## Supplementary Material

|                             |                       |                             |                             |                             |                             |                             |
|-----------------------------|-----------------------|-----------------------------|-----------------------------|-----------------------------|-----------------------------|-----------------------------|
|                             | <b>Total SFA</b>      | <b>-0.05 (-0.09, -0.01)</b> | 0.08 (-0.12, 0.29)          | -0.03 (-0.08, 0.02)         | <b>-0.07 (-0.1, -0.03)</b>  | <b>-0.59 (-0.83, -0.36)</b> |
| Monounsaturated Fats (mol%) | <b>14:1n-5</b>        | -0.02 (-0.07, 0.04)         | -0.21 (-0.47, 0.05)         | <b>0.07 (0.01, 0.13)</b>    | 0.03 (0.00, 0.07)           | -0.04 (-0.35, 0.27)         |
|                             | <b>16:1n-7</b>        | 0.01 (-0.03, 0.06)          | <b>-0.30 (-0.52, -0.08)</b> | 0.01 (-0.05, 0.06)          | 0.03 (0.00, 0.07)           | -0.10 (-0.36, 0.17)         |
|                             | <b>17:1n-7</b>        | -0.02 (-0.07, 0.03)         | -0.03 (-0.27, 0.21)         | 0.00 (-0.06, 0.06)          | 0.02 (-0.02, 0.06)          | 0.02 (-0.26, 0.30)          |
|                             | <b>18:1n-7</b>        | <b>0.08 (0.03, 0.13)</b>    | -0.16 (-0.38, 0.07)         | 0.00 (-0.06, 0.05)          | <b>-0.05 (-0.09, -0.01)</b> | 0.20 (-0.09, 0.48)          |
|                             | <b>18:1n-9</b>        | <b>0.06 (0.02, 0.11)</b>    | -0.03 (-0.24, 0.18)         | <b>0.06 (0.01, 0.11)</b>    | <b>0.06 (0.02, 0.09)</b>    | <b>0.69 (0.46, 0.92)</b>    |
|                             | <b>20:1n-9</b>        | <b>0.06 (0.01, 0.10)</b>    | 0.03 (-0.18, 0.24)          | -0.02 (-0.07, 0.03)         | <b>-0.12 (-0.16, -0.09)</b> | 0.06 (-0.2, 0.32)           |
|                             | <b>22:1n-9</b>        | <b>0.05 (0.00, 0.10)</b>    | 0.05 (-0.18, 0.28)          | -0.02 (-0.08, 0.03)         | <b>-0.20 (-0.23, -0.17)</b> | -0.07 (-0.35, 0.2)          |
|                             | <b>24:1n-9</b>        | 0.02 (-0.03, 0.07)          | 0.01 (-0.22, 0.24)          | -0.05 (-0.11, 0.00)         | <b>-0.22 (-0.25, -0.19)</b> | -0.21 (-0.49, 0.06)         |
|                             | <b>Total MUFA</b>     | <b>0.06 (0.02, 0.11)</b>    | -0.04 (-0.25, 0.17)         | <b>0.06 (0.01, 0.11)</b>    | <b>0.04 (0.00, 0.08)</b>    | <b>0.61 (0.37, 0.85)</b>    |
| n-3 PUFA (mol%)             | <b>18:3n-3 (ALA)</b>  | -0.01 (-0.05, 0.03)         | 0.05 (-0.15, 0.26)          | 0.00 (-0.05, 0.05)          | <b>0.07 (0.03, 0.10)</b>    | 0.21 (-0.04, 0.46)          |
|                             | <b>20:3n-3</b>        | 0.01 (-0.04, 0.06)          | 0.08 (-0.14, 0.30)          | <b>-0.06 (-0.11, -0.01)</b> | <b>-0.17 (-0.2, -0.14)</b>  | -0.20 (-0.46, 0.07)         |
|                             | <b>20:5n-3 (EPA)</b>  | 0.01 (-0.04, 0.06)          | 0.04 (-0.19, 0.28)          | <b>0.09 (0.03, 0.14)</b>    | 0.01 (-0.02, 0.05)          | 0.26 (-0.02, 0.54)          |
|                             | <b>22:5n-3 (DPA)</b>  | 0.03 (-0.01, 0.07)          | 0.00 (-0.21, 0.21)          | 0.01 (-0.04, 0.07)          | <b>-0.05 (-0.09, -0.02)</b> | 0.08 (-0.17, 0.33)          |
|                             | <b>22:6n-3 (DHA)</b>  | <b>0.07 (0.02, 0.12)</b>    | -0.04 (-0.28, 0.19)         | <b>0.08 (0.02, 0.14)</b>    | <b>-0.10 (-0.13, -0.06)</b> | 0.00 (-0.28, 0.28)          |
|                             | <b>Total n-3 PUFA</b> | 0.01 (-0.03, 0.06)          | -0.02 (-0.23, 0.18)         | 0.04 (-0.01, 0.09)          | 0.03 (-0.01, 0.07)          | 0.22 (-0.02, 0.46)          |
| n-6 PUF A                   | <b>18:2n-6 (LA)</b>   | -0.01 (-0.06, 0.03)         | -0.02 (-0.25, 0.20)         | -0.03 (-0.09, 0.02)         | <b>0.06 (0.03, 0.10)</b>    | 0.17 (-0.09, 0.43)          |

Supplementary Material

|               |                       |                          |                     |                            |                             |                             |
|---------------|-----------------------|--------------------------|---------------------|----------------------------|-----------------------------|-----------------------------|
|               | <b>18:3n-6 (GLA)</b>  | 0.02 (-0.03, 0.07)       | 0.07 (-0.18, 0.33)  | 0.06 (-0.00, 0.12)         | 0.03 (0.00, 0.07)           | <b>0.31 (0.01, 0.61)</b>    |
|               | <b>20:2n-6</b>        | 0.01 (-0.03, 0.05)       | -0.08 (-0.26, 0.1)  | 0.00 (-0.04, 0.05)         | 0.00 (-0.04, 0.03)          | -0.13 (-0.34, 0.09)         |
|               | <b>20:3n-6 (DGLA)</b> | 0.05 (0.00, 0.10)        | 0.03 (-0.21, 0.27)  | 0.03 (-0.03, 0.09)         | <b>-0.14 (-0.17, -0.11)</b> | -0.01 (-0.31, 0.28)         |
|               | <b>20:4n-6 (ARA)</b>  | <b>0.08 (0.03, 0.13)</b> | -0.04 (-0.28, 0.2)  | 0.04 (-0.02, 0.09)         | <b>-0.13 (-0.17, -0.10)</b> | 0.01 (-0.27, 0.30)          |
|               | <b>22:4n-6</b>        | <b>0.05 (0.00, 0.10)</b> | -0.03 (-0.26, 0.19) | 0.02 (-0.04, 0.07)         | <b>-0.06 (-0.1, -0.02)</b>  | -0.19 (-0.46, 0.08)         |
|               | <b>22:5n-6</b>        | 0.04 (0.00, 0.09)        | -0.04 (-0.26, 0.18) | -0.01 (-0.07, 0.04)        | <b>-0.17 (-0.21, -0.14)</b> | <b>-0.32 (-0.58, -0.06)</b> |
|               | <b>Total n-6 PUFA</b> | 0.00 (-0.05, 0.04)       | -0.04 (-0.27, 0.18) | -0.03 (-0.08, 0.03)        | <b>0.04 (0.01, 0.08)</b>    | 0.10 (-0.16, 0.36)          |
| <b>Ratios</b> | <b>n-6:n-3 PUFA</b>   | -0.01 (-0.05, 0.02)      | 0.09 (-0.07, 0.25)  | <b>-0.04 (-0.08, 0.00)</b> | 0.00 (-0.03, 0.03)          | -0.15 (-0.34, 0.05)         |
|               | <b>ARA:DHA</b>        | -0.02 (-0.08, 0.04)      | -0.06 (-0.35, 0.23) | -0.04 (-0.12, 0.03)        | <b>0.05 (0.02, 0.07)</b>    | 0.09 (-0.26, 0.44)          |

|                              |                  | <b>Maternal Characteristics (95% CI)</b>                  |                             |                          |                                               |
|------------------------------|------------------|-----------------------------------------------------------|-----------------------------|--------------------------|-----------------------------------------------|
|                              |                  | <b>Maternal Pre-pregnancy BMI (Underweight vs normal)</b> | <b>Overweight vs normal</b> | <b>Obese vs normal</b>   | <b>Delivery method (Caesarean vs vaginal)</b> |
|                              | <b>Total Fat</b> | -0.37 (-0.81, 0.06)                                       | <b>0.44 (0.19, 0.68)</b>    | <b>0.47 (0.16, 0.78)</b> | 0.00 (-0.22, 0.23)                            |
| <b>Saturated fats (mol%)</b> | <b>10:0</b>      | 0.56 (-0.01, 1.13)                                        | <b>0.50 (0.22, 0.79)</b>    | -0.01 (-0.39, 0.36)      | 0.06 (-0.20, 0.33)                            |
|                              | <b>12:0</b>      | -0.35 (-0.81, 0.11)                                       | <b>0.38 (0.14, 0.66)</b>    | 0.05 (-0.27, 0.38)       | -0.20 (-0.44, 0.04)                           |

## Supplementary Material

|                             |                  |                          |                             |                           |                             |
|-----------------------------|------------------|--------------------------|-----------------------------|---------------------------|-----------------------------|
|                             | <b>14:0</b>      | -0.14 (-0.63, 0.35)      | <b>0.30 (0.02, 0.58)</b>    | 0.33 (-0.02, 0.68)        | -0.20 (-0.44, 0.05)         |
|                             | <b>16:0</b>      | 0.09 (-0.35, 0.53)       | <b>0.33 (0.08, 0.58)</b>    | <b>0.79 (0.47, 1.10)</b>  | 0.09 (-0.14, 0.32)          |
|                             | <b>18:0</b>      | <b>0.65 (0.16, 1.14)</b> | -0.21 (-0.49, 0.06)         | 0.21 (-0.14, 0.56)        | <b>-0.29 (-0.54, -0.05)</b> |
|                             | <b>20:0</b>      | 0.28 (-0.20, 0.77)       | -0.16 (-0.44, 0.12)         | -0.02 (-0.37, 0.33)       | -0.17 (-0.41, 0.08)         |
|                             | <b>21:0</b>      | -0.03 (-0.57, 0.50)      | -0.11 (-0.42, 0.20)         | <b>0.68 (0.30, 1.07)</b>  | 0.11 (-0.17, 0.39)          |
|                             | <b>22:0</b>      | -0.09 (-0.51, 0.34)      | -0.15 (-0.38, 0.09)         | -0.20 (-0.50, 0.10)       | -0.12 (-0.33, 0.08)         |
|                             | <b>23:0</b>      | 0.33 (-0.17, 0.82)       | 0.03 (-0.25, 0.31)          | <b>0.54 (0.18, 0.89)</b>  | -0.13 (-0.37, 0.12)         |
|                             | <b>24:0</b>      | -0.19 (-0.69, 0.32)      | -0.22 (-0.51, 0.07)         | <b>0.04 (-0.32, 0.41)</b> | -0.11 (-0.37, 0.14)         |
|                             | <b>Total SFA</b> | -0.02 (-0.44, 0.40)      | <b>0.41 (0.18, 0.65)</b>    | <b>0.58 (0.29, 0.88)</b>  | -0.19 (-0.40, 0.03)         |
| Monounsaturated Fats (mol%) | <b>14:1n-5</b>   | 0.08 (-0.44, 0.60)       | -0.07 (-0.37, 0.24)         | <b>0.87 (0.50, 1.25)</b>  | -0.16 (-0.43, 0.11)         |
|                             | <b>16:1n-7</b>   | <b>0.52 (0.05, 0.99)</b> | -0.06 (-0.32, 0.21)         | <b>0.45 (0.12, 0.79)</b>  | 0.07 (-0.17, 0.32)          |
|                             | <b>17:1n-7</b>   | 0.34 (-0.17, 0.84)       | -0.09 (-0.38, 0.21)         | <b>0.54 (0.16, 0.92)</b>  | -0.22 (-0.47, 0.04)         |
|                             | <b>18:1n-7</b>   | 0.34 (-0.17, 0.84)       | -0.20 (-0.48, 0.09)         | -0.01 (-0.37, 0.35)       | <b>0.32 (0.07, 0.57)</b>    |
|                             | <b>18:1n-9</b>   | 0.25 (-0.18, 0.67)       | <b>-0.52 (-0.76, -0.28)</b> | -0.25 (-0.56, 0.05)       | 0.13 (-0.09, 0.36)          |
|                             | <b>20:1n-9</b>   | -0.16 (-0.62, 0.31)      | <b>-0.43 (-0.69, -0.16)</b> | -0.17 (-0.50, 0.17)       | 0.19 (-0.05, 0.42)          |
|                             | <b>22:1n-9</b>   | -0.13 (-0.63, 0.37)      | -0.19 (-0.48, 0.09)         | -0.08 (-0.43, 0.28)       | 0.10 (-0.15, 0.35)          |
|                             | <b>24:1n-9</b>   | -0.03 (-0.53, 0.47)      | -0.19 (-0.48, 0.09)         | 0.10 (-0.26, 0.45)        | 0.14 (-0.11, 0.39)          |

## Supplementary Material

|                        |                       |                     |                             |                             |                          |
|------------------------|-----------------------|---------------------|-----------------------------|-----------------------------|--------------------------|
|                        | <b>Total MUFA</b>     | 0.25 (-0.18, 0.67)  | <b>-0.58 (-0.82, -0.34)</b> | -0.15 (-0.45, 0.15)         | 0.12 (-0.11, 0.34)       |
| <b>n-3 PUFA (mol%)</b> | <b>18:3n-3 (ALA)</b>  | -0.24 (-0.69, 0.22) | 0.04 (-0.22, 0.29)          | <b>-0.38 (-0.7, -0.05)</b>  | 0.05 (-0.18, 0.27)       |
|                        | <b>20:3n-3</b>        | -0.23 (-0.73, 0.26) | -0.05 (-0.33, 0.23)         | -0.17 (-0.52, 0.19)         | 0.12 (-0.13, 0.36)       |
|                        | <b>20:5n-3 (EPA)</b>  | -0.13 (-0.64, 0.38) | -0.03 (-0.32, 0.27)         | -0.25 (-0.61, 0.12)         | -0.18 (-0.44, 0.07)      |
|                        | <b>22:5n-3 (DPA)</b>  | 0.02 (-0.45, 0.48)  | 0.01 (-0.25, 0.28)          | -0.17 (-0.50, 0.16)         | 0.04 (-0.19, 0.27)       |
|                        | <b>22:6n-3 (DHA)</b>  | -0.25 (-0.75, 0.25) | -0.17 (-0.45, 0.12)         | <b>-0.63 (-0.98, -0.27)</b> | 0.06 (-0.19, 0.32)       |
|                        | <b>Total n-3 PUFA</b> | -0.37 (-0.81, 0.07) | 0.00 (-0.25, 0.25)          | <b>-0.47 (-0.78, -0.15)</b> | 0.09 (-0.14, 0.31)       |
| <b>n-6 PUFA (mol%)</b> | <b>18:2n-6 (LA)</b>   | -0.33 (-0.79, 0.13) | 0.06 (-0.21, 0.32)          | <b>-0.66 (-0.99, -0.33)</b> | 0.14 (-0.09, 0.38)       |
|                        | <b>18:3n-6 (GLA)</b>  | 0.38 (-0.18, 0.94)  | 0.07 (-0.25, 0.39)          | 0.22 (-0.18, 0.62)          | -0.13 (-0.41, 0.15)      |
|                        | <b>20:2n-6</b>        | -0.14 (-0.55, 0.27) | -0.10 (-0.32, 0.13)         | -0.15 (-0.44, 0.14)         | -0.10 (-0.30, 0.10)      |
|                        | <b>20:3n-6 (DGLA)</b> | 0.17 (-0.37, 0.70)  | 0.01 (-0.30, 0.32)          | <b>0.52 (0.14, 0.91)</b>    | 0.00 (-0.26, 0.27)       |
|                        | <b>20:4n-6 (ARA)</b>  | 0.12 (-0.40, 0.64)  | -0.07 (-0.37, 0.22)         | -0.09 (-0.46, 0.28)         | <b>0.35 (0.09, 0.61)</b> |
|                        | <b>22:4n-6</b>        | 0.03 (-0.47, 0.53)  | -0.12 (-0.41, 0.16)         | -0.17 (-0.53, 0.19)         | 0.11 (-0.14, 0.36)       |
|                        | <b>22:5n-6</b>        | -0.10 (-0.57, 0.38) | -0.06 (-0.33, 0.21)         | <b>-0.37 (-0.71, -0.03)</b> | 0.13 (-0.10, 0.37)       |
| <b>Total n-6 PUFA</b>  | -0.34 (-0.80, 0.11)   | 0.01 (-0.25, 0.27)  | <b>-0.67 (-1.00, -0.34)</b> | 0.11 (-0.12, 0.35)          |                          |
| <b>Ratios</b>          | <b>n-6:n-3 PUFA</b>   | 0.04 (-0.32, 0.41)  | -0.06 (-0.26, 0.14)         | -0.16 (-0.42, 0.1)          | -0.02 (-0.20, 0.16)      |
|                        | <b>ARA:DHA</b>        | 0.39 (-0.20, 0.99)  | 0.05 (-0.29, 0.40)          | <b>0.74 (0.31, 1.16)</b>    | 0.09 (-0.23, 0.40)       |

Supplementary Material

| Sociodemographic Characteristics (95% CI) |                            |                                                   |                                                              |                                                             |                           |                                                    |                                                 |                                                 |                                                    |                           |                                       |                                                    |
|-------------------------------------------|----------------------------|---------------------------------------------------|--------------------------------------------------------------|-------------------------------------------------------------|---------------------------|----------------------------------------------------|-------------------------------------------------|-------------------------------------------------|----------------------------------------------------|---------------------------|---------------------------------------|----------------------------------------------------|
|                                           | Maternal Age<br>(/5 years) | Parity<br>(>1 vs 1)                               | Maternal<br>Education (Post-<br>secondary degree<br>vs none) | Maternal<br>Ethnicity (vs<br>European)<br>East or Southeast | South or West<br>Asian    | African or<br>Caribbean                            | Other vs<br>European                            | Income<br>(below poverty<br>line vs not)        | English spoken<br>at home<br>(yes vs mixed)        | English vs no<br>English  | Marital status<br>(married vs single) |                                                    |
| <b>Total Fat</b>                          | 0.04<br>(-0.07,<br>0.15)   | <b>0.31</b><br>( <b>0.09</b> ,<br><b>0.53</b> )   | -0.05<br>(-0.36,<br>0.26)                                    | -0.06<br>(-0.35,<br>0.23)                                   | 0.19<br>(-0.13,<br>0.52)  | 0.02<br>(-0.28,<br>0.33)                           | -0.02<br>(-0.74,<br>0.69)                       | <b>0.48</b><br>( <b>0.21</b> ,<br><b>0.74</b> ) | -0.04<br>(-0.28,<br>0.20)                          | -0.11<br>(-0.46,<br>0.25) | -0.07<br>(-0.56,<br>0.41)             |                                                    |
| <b>Saturated fats (mol%)</b>              | <b>10:0</b>                | 0.09<br>(-0.04,<br>0.22)                          | 0.09<br>(-0.18,<br>0.36)                                     | -0.19<br>(-0.56,<br>0.18)                                   | -0.11<br>(-0.44,<br>0.22) | -0.18<br>(-0.55,<br>0.19)                          | 0.23<br>(-0.13,<br>1.53)                        | 0.71<br>(-0.11,<br>1.53)                        | -0.15<br>(-0.48,<br>0.19)                          | -0.22<br>(-0.53,<br>0.09) | -0.17<br>(-0.65,<br>0.32)             | 0.09<br>(-0.49,<br>0.67)                           |
|                                           | <b>12:0</b>                | 0.01<br>(-0.10,<br>0.13)                          | 0.03<br>(-0.21,<br>0.27)                                     | -0.11<br>(-0.44,<br>0.21)                                   | -0.19<br>(-0.48,<br>0.09) | <b>0.45</b><br>( <b>0.13</b> ,<br><b>0.77</b> )    | <b>0.55</b><br>( <b>0.25</b> ,<br><b>0.85</b> ) | <b>1.16</b><br>( <b>0.49</b> ,<br><b>1.84</b> ) | <b>0.36</b><br>( <b>0.06</b> ,<br><b>0.65</b> )    | -0.03<br>(-0.29,<br>0.23) | -0.26<br>(-0.65,<br>0.13)             | <b>-0.82</b><br>( <b>-1.32</b> ,<br><b>-0.31</b> ) |
|                                           | <b>14:0</b>                | <b>-0.12</b><br>( <b>-0.24</b> ,<br><b>0.00</b> ) | <b>0.26</b><br>( <b>0.02</b> ,<br><b>0.51</b> )              | -0.13<br>(-0.47,<br>0.21)                                   | -0.26<br>(-0.54,<br>0.02) | <b>0.84</b><br>( <b>0.53</b> ,<br><b>1.16</b> )    | <b>0.78</b><br>( <b>0.48</b> ,<br><b>1.07</b> ) | <b>1.39</b><br>( <b>0.74</b> ,<br><b>2.04</b> ) | <b>0.62</b><br>( <b>0.32</b> ,<br><b>0.92</b> )    | 0.02<br>(-0.26,<br>0.29)  | -0.34<br>(-0.74,<br>0.07)             | <b>-0.87</b><br>( <b>-1.39</b> ,<br><b>-0.35</b> ) |
|                                           | <b>16:0</b>                | 0.00<br>(-0.11,<br>0.12)                          | 0.08<br>(-0.15,<br>0.31)                                     | <b>-0.46</b><br>( <b>-0.77</b> ,<br><b>-0.16</b> )          | 0.01<br>(-0.29,<br>0.30)  | <b>0.52</b><br>( <b>0.19</b> ,<br><b>0.85</b> )    | 0.10<br>(-0.21,<br>0.41)                        | 0.22<br>(-0.48,<br>0.91)                        | 0.11<br>(-0.18,<br>0.39)                           | 0.12<br>(-0.14,<br>0.37)  | -0.34<br>(-0.72,<br>0.05)             | -0.16<br>(-0.67,<br>0.35)                          |
|                                           | <b>18:0</b>                | -0.08<br>(-0.20,<br>0.04)                         | 0.10<br>(-0.15,<br>0.35)                                     | <b>-0.41</b><br>( <b>-0.74</b> ,<br><b>-0.08</b> )          | 0.04<br>(-0.28,<br>0.35)  | <b>-0.37</b><br>( <b>-0.72</b> ,<br><b>-0.01</b> ) | 0.02<br>(-0.31,<br>0.35)                        | -0.08<br>(-0.83,<br>0.66)                       | -0.25<br>(-0.56,<br>0.05)                          | 0.09<br>(-0.20,<br>0.38)  | -0.17<br>(-0.60,<br>0.27)             | <b>0.80</b><br>( <b>0.24</b> ,<br><b>1.36</b> )    |
|                                           | <b>20:0</b>                | -0.01<br>(-0.13,<br>0.11)                         | <b>-0.27</b><br>( <b>-0.52</b> ,<br><b>-0.03</b> )           | -0.08<br>(-0.41,<br>0.25)                                   | -0.05<br>(-0.37,<br>0.27) | -0.07<br>(-0.43,<br>0.28)                          | -0.04<br>(-0.37,<br>0.29)                       | -0.32<br>(-1.06,<br>0.43)                       | <b>-0.35</b><br>( <b>-0.64</b> ,<br><b>-0.05</b> ) | -0.12<br>(-0.40,<br>0.15) | -0.04<br>(-0.45,<br>0.37)             | 0.35<br>(-0.19,<br>0.89)                           |
|                                           | <b>21:0</b>                | 0.1<br>(-0.04,<br>0.23)                           | 0.18<br>(-0.10,<br>0.46)                                     | 0.14<br>(-0.23,<br>0.52)                                    | -0.21<br>(-0.57,<br>0.15) | -0.24<br>(-0.64,<br>0.17)                          | -0.30<br>(-0.67,<br>0.08)                       | 0.43<br>(-0.37,<br>1.23)                        | -0.09<br>(-0.44,<br>0.26)                          | 0.15<br>(-0.17,<br>0.47)  | 0.08 (-<br>0.40,<br>0.55)             | 0.32<br>(-0.30,<br>0.93)                           |

Supplementary Material

|                             |                        |                             |                                |                                |                                |                                |                                |                                |                                |                         |                                |                                |
|-----------------------------|------------------------|-----------------------------|--------------------------------|--------------------------------|--------------------------------|--------------------------------|--------------------------------|--------------------------------|--------------------------------|-------------------------|--------------------------------|--------------------------------|
| Monounsaturated Fats (mol%) | <b>22:0</b>            | 0.02<br>(-0.08, 0.12)       | -0.20<br>(-0.40, 0.01)         | 0.06<br>(-0.22, 0.34)          | 0.11<br>(-0.16, 0.37)          | 0.05<br>(-0.25, 0.36)          | 0.05<br>(-0.23, 0.34)          | 0.01<br>(-0.69, 0.71)          | -0.19<br>(-0.45, 0.07)         | -0.14<br>(-0.38, 0.11)  | -0.10<br>(-0.47, 0.27)         | 0.06<br>(-0.43, 0.56)          |
|                             | <b>23:0</b>            | -0.06<br>(-0.18, 0.06)      | 0.14<br>(-0.11, 0.38)          | 0.15<br>(-0.18, 0.49)          | <b>-0.65</b><br>(-0.96, -0.35) | -0.08<br>(-0.43, 0.26)         | -0.31<br>(-0.63, 0.01)         | -0.19<br>(-0.92, 0.54)         | -0.05<br>(-0.35, 0.26)         | 0.26<br>(-0.01, 0.52)   | 0.32<br>(-0.07, 0.72)          | -0.02<br>(-0.55, 0.51)         |
|                             | <b>24:0</b>            | -0.11<br>(-0.23, 0.01)      | -0.21<br>(-0.47, 0.04)         | 0.05<br>(-0.29, 0.40)          | -0.19<br>(-0.52, 0.14)         | 0.21<br>(-0.15, 0.58)          | 0.15<br>(-0.19, 0.49)          | 0.46<br>(-0.29, 1.2)           | -0.11<br>(-0.42, 0.21)         | -0.09<br>(-0.38, 0.20)  | -0.18<br>(-0.61, 0.26)         | -0.25<br>(-0.82, 0.32)         |
|                             | <b>Total SFA</b>       | -0.05<br>(-0.16, 0.05)      | 0.18<br>(-0.05, 0.40)          | <b>-0.38</b><br>(-0.68, -0.08) | -0.22<br>(-0.47, 0.04)         | <b>0.70</b><br>(0.41, 0.99)    | <b>0.60</b><br>(0.32, 0.87)    | <b>1.21</b><br>(0.60, 1.82)    | <b>0.38</b><br>(0.11, 0.65)    | 0.05<br>(-0.18, 0.29)   | <b>-0.45</b><br>(-0.81, -0.09) | <b>-0.63</b><br>(-1.10, -0.16) |
|                             | <b>14:1n-5</b>         | 0.03<br>(-0.11, 0.17)       | -0.08<br>(-0.37, 0.20)         | 0.17<br>(-0.21, 0.55)          | <b>-1.00</b><br>(-1.28, -0.72) | -0.20<br>(-0.52, 0.12)         | <b>-1.02</b><br>(-1.31, -0.72) | 0.23<br>(-0.42, 0.88)          | <b>-0.42</b><br>(-0.77, -0.08) | 0.18<br>(-0.12, 0.48)   | <b>-0.49</b><br>(-0.95, -0.04) | 0.09<br>(-0.52, 0.70)          |
|                             | <b>16:1n-7</b>         | -0.02<br>(-0.14, 0.10)      | 0.02<br>(-0.23, 0.26)          | -0.20<br>(-0.52, 0.12)         | 0.07<br>(-0.21, 0.35)          | <b>-0.45</b><br>(-0.77, -0.14) | <b>-0.70</b><br>(-1.00, -0.41) | -0.07<br>(-0.73, 0.60)         | -0.24<br>(-0.53, 0.06)         | 0.09<br>(-0.18, 0.37)   | -0.38<br>(-0.79, 0.02)         | 0.28<br>(-0.26, 0.82)          |
|                             | <b>17:1n-7</b>         | <b>0.14</b><br>(0.02, 0.27) | 0.06<br>(-0.20, 0.31)          | 0.12<br>(-0.23, 0.47)          | -0.23<br>(-0.54, 0.08)         | <b>-0.52</b><br>(-0.87, -0.17) | <b>-0.73</b><br>(-1.06, -0.40) | -0.60<br>(-1.32, 0.12)         | <b>-0.58</b><br>(-0.89, -0.26) | 0.20<br>(-0.09, 0.48)   | <b>-0.43</b><br>(-0.85, 0.00)  | <b>0.71</b><br>(0.16, 1.26)    |
|                             | <b>18:1n-7</b>         | -0.02<br>(-0.15, 0.1)       | -0.14<br>(-0.39, 0.12)         | -0.04<br>(-0.39, 0.30)         | <b>0.72</b><br>(0.44, 0.99)    | <b>-0.58</b><br>(-0.89, -0.27) | -0.21<br>(-0.5, 0.08)          | 0.21<br>(-0.45, 0.87)          | -0.28<br>(-0.60, 0.03)         | -0.11<br>(-0.38, 0.17)  | 0.19<br>(-0.22, 0.59)          | <b>0.64 (0.1, 1.18)</b>        |
|                             | <b>18:1n-9</b>         | 0.07<br>(-0.03, 0.18)       | <b>-0.36</b><br>(-0.58, -0.14) | <b>0.31</b><br>(0.01, 0.61)    | -0.16<br>(-0.42, 0.09)         | <b>-0.91</b><br>(-1.20, -0.62) | <b>-0.83</b><br>(-1.10, -0.56) | <b>-1.15</b><br>(-1.77, -0.53) | <b>-0.61</b><br>(-0.87, -0.34) | 0.00<br>(-0.24, 0.24)   | 0.34<br>(-0.02, 0.70)          | <b>0.65</b><br>(0.17, 1.12)    |
|                             | <b>20:1n-9</b>         | -0.02<br>(-0.14, 0.09)      | <b>-0.36</b><br>(-0.59, -0.13) | 0.23<br>(-0.09, 0.55)          | <b>0.32</b><br>(0.02, 0.63)    | -0.23<br>(-0.58, 0.11)         | -0.08<br>(-0.40, 0.24)         | -0.25<br>(-0.98, 0.47)         | <b>-0.46</b><br>(-0.75, -0.18) | -0.23<br>(-0.49, 0.04)  | 0.10<br>(-0.29, 0.50)          | 0.34<br>(-0.19, 0.86)          |
| <b>22:1n-9</b>              | -0.05<br>(-0.17, 0.07) | -0.24<br>(-0.49, 0.01)      | -0.03<br>(-0.37, 0.31)         | 0.17<br>(-0.15, 0.50)          | 0.18<br>(-0.19, 0.54)          | 0.13<br>(-0.21, 0.47)          | 0.45<br>(-0.29, 1.20)          | -0.27<br>(-0.57, 0.04)         | -0.16<br>(-0.43, 0.11)         | -0.08 (-<br>0.48, 0.33) | -0.13<br>(-0.66, 0.41)         |                                |

## Supplementary Material

|                      |                       |                                                |                                                 |                                              |                                                 |                                                 |                                                 |                                                 |                                                 |                                              |                                              |                                              |
|----------------------|-----------------------|------------------------------------------------|-------------------------------------------------|----------------------------------------------|-------------------------------------------------|-------------------------------------------------|-------------------------------------------------|-------------------------------------------------|-------------------------------------------------|----------------------------------------------|----------------------------------------------|----------------------------------------------|
|                      | <b>24:1n-9</b>        | -0.07<br>(-0.19,<br>0.06)                      | -0.10<br>(-0.35,<br>0.16)                       | 0.06<br>(-0.28,<br>0.40)                     | 0.15<br>(-0.17,<br>0.48)                        | 0.22<br>(-0.14,<br>0.58)                        | 0.15<br>(-0.19,<br>0.49)                        | 0.53<br>(-0.22,<br>1.27)                        | -0.12<br>(-0.44,<br>0.19)                       | -0.03<br>(-0.31,<br>0.25)                    | -0.13<br>(-0.56,<br>0.29)                    | -0.29<br>(-0.85,<br>0.26)                    |
|                      | <b>Total MUFA</b>     | 0.07<br>(-0.04,<br>0.18)                       | <b>-0.30</b><br><b>(-0.53,</b><br><b>-0.08)</b> | 0.20<br>(-0.10,<br>0.51)                     | -0.13<br>(-0.38,<br>0.13)                       | <b>-0.99</b><br><b>(-1.27,</b><br><b>-0.70)</b> | <b>-0.86</b><br><b>(-1.13,</b><br><b>-0.60)</b> | <b>-1.00</b><br><b>(-1.62,</b><br><b>-0.39)</b> | <b>-0.69</b><br><b>(-0.95,</b><br><b>-0.42)</b> | -0.03<br>(-0.27,<br>0.21)                    | 0.23<br>(-0.14,<br>0.59)                     | <b>0.69</b><br><b>(0.21,</b><br><b>1.16)</b> |
| n-3 PUFA (mol%)      | <b>18:3n-3 (ALA)</b>  | 0.02<br>(-0.09,<br>0.13)                       | 0.14<br>(-0.09,<br>0.37)                        | <b>0.41</b><br><b>(0.11,</b><br><b>0.71)</b> | 0.13<br>(-0.16,<br>0.42)                        | 0.15<br>(-0.18,<br>0.48)                        | -0.01<br>(-0.31,<br>0.30)                       | -0.41<br>(-1.12,<br>0.29)                       | 0.10<br>(-0.17,<br>0.38)                        | -0.02<br>(-0.28,<br>0.23)                    | <b>0.40</b><br><b>(0.02,</b><br><b>0.79)</b> | 0.25<br>(-0.25,<br>0.76)                     |
|                      | <b>20:3n-3</b>        | <b>-0.12</b><br><b>(-0.24,</b><br><b>0.00)</b> | 0.11<br>(-0.14,<br>0.36)                        | 0.07<br>(-0.26,<br>0.40)                     | <b>0.45</b><br><b>(0.14,</b><br><b>0.76)</b>    | <b>0.41</b><br><b>(0.07,</b><br><b>0.76)</b>    | <b>0.43</b><br><b>(0.11,</b><br><b>0.75)</b>    | 0.68<br>(-0.03,<br>1.40)                        | 0.18<br>(-0.13,<br>0.48)                        | -0.06<br>(-0.34,<br>0.23)                    | 0.07<br>(-0.35,<br>0.50)                     | 0.10<br>(-0.46,<br>0.67)                     |
|                      | <b>20:5n-3 (EPA)</b>  | 0.02<br>(-0.11,<br>0.14)                       | -0.14<br>(-0.40,<br>0.11)                       | 0.12<br>(-0.23,<br>0.46)                     | -0.29<br>(-0.62,<br>0.04)                       | -0.12<br>(-0.48,<br>0.25)                       | -0.16<br>(-0.5,<br>0.18)                        | -0.12<br>(-0.87,<br>0.62)                       | -0.19<br>(-0.51,<br>0.13)                       | 0.21<br>(-0.09,<br>0.50)                     | 0.30<br>(-0.14,<br>0.75)                     | -0.09<br>(-0.68,<br>0.51)                    |
|                      | <b>22:5n-3 (DPA)</b>  | 0.03<br>(-0.08,<br>0.14)                       | 0.01<br>(-0.22,<br>0.24)                        | 0.08<br>(-0.23,<br>0.39)                     | 0.19<br>(-0.11,<br>0.49)                        | 0.18<br>(-0.16,<br>0.51)                        | 0.09<br>(-0.22,<br>0.40)                        | <b>0.79</b><br><b>(0.06,</b><br><b>1.51)</b>    | 0.01<br>(-0.27,<br>0.30)                        | 0.15<br>(-0.11,<br>0.42)                     | 0.22<br>(-0.18,<br>0.61)                     | -0.26<br>(-0.79,<br>0.28)                    |
|                      | <b>22:6n-3 (DHA)</b>  | 0.11<br>(-0.02,<br>0.23)                       | -0.19<br>(-0.44,<br>0.06)                       | -0.20<br>(-0.54,<br>0.15)                    | <b>0.45</b><br><b>(0.13,</b><br><b>0.78)</b>    | 0.04<br>(-0.32,<br>0.40)                        | <b>0.41</b><br><b>(0.07,</b><br><b>0.75)</b>    | 0.16<br>(-0.59,<br>0.91)                        | -0.10<br>(-0.41,<br>0.22)                       | <b>0.32</b><br><b>(0.03,</b><br><b>0.61)</b> | 0.41<br>(-0.03,<br>0.84)                     | -0.39<br>(-0.98,<br>0.20)                    |
|                      | <b>Total n-3 PUFA</b> | 0.03<br>(-0.08,<br>0.14)                       | 0.05<br>(-0.18,<br>0.27)                        | 0.28<br>(-0.02,<br>0.58)                     | 0.17<br>(-0.11,<br>0.46)                        | 0.19<br>(-0.13,<br>0.51)                        | 0.11<br>(-0.19,<br>0.41)                        | -0.46<br>(-1.16,<br>0.24)                       | 0.07<br>(-0.21,<br>0.34)                        | 0.07<br>(-0.19,<br>0.32)                     | 0.29<br>(-0.09,<br>0.67)                     | 0.20<br>(-0.31,<br>0.71)                     |
|                      | n-6 PUFA (mol%)       | <b>18:2n-6 (LA)</b>                            | -0.01<br>(-0.13,<br>0.11)                       | 0.16<br>(-0.08,<br>0.39)                     | 0.24<br>(-0.08,<br>0.56)                        | <b>0.40</b><br><b>(0.10,</b><br><b>0.70)</b>    | 0.05<br>(-0.29,<br>0.39)                        | 0.13<br>(-0.18,<br>0.44)                        | <b>-0.71</b><br><b>(-1.41,</b><br><b>0.00)</b>  | 0.22<br>(-0.07,<br>0.52)                     | -0.08<br>(-0.35,<br>0.20)                    | 0.36<br>(-0.06,<br>0.77)                     |
| <b>18:3n-6 (GLA)</b> |                       | 0.05<br>(-0.09,<br>0.19)                       | 0.03<br>(-0.25,<br>0.31)                        | 0.10<br>(-0.28,<br>0.47)                     | <b>-0.84</b><br><b>(-1.17,</b><br><b>-0.50)</b> | <b>-0.59</b><br><b>(-0.96,</b><br><b>-0.21)</b> | <b>-0.55</b><br><b>(-0.90,</b><br><b>-0.20)</b> | <b>-1.25</b><br><b>(-2.00,</b><br><b>-0.51)</b> | -0.31<br>(-0.66,<br>0.04)                       | 0.08<br>(-0.23,<br>0.39)                     | 0.45<br>(-0.02,<br>0.92)                     | 0.20<br>(-0.40,<br>0.81)                     |
| <b>20:2n-6</b>       |                       | 0.03<br>(-0.07,<br>0.12)                       | -0.05<br>(-0.25,<br>0.15)                       | 0.06<br>(-0.21,<br>0.33)                     | <b>0.26</b><br><b>(0.00,</b><br><b>0.51)</b>    | 0.03<br>(-0.27,<br>0.32)                        | 0.05<br>(-0.22,<br>0.32)                        | 0.05<br>(-0.63,<br>0.74)                        | -0.05<br>(-0.30,<br>0.20)                       | -0.11<br>(-0.35,<br>0.12)                    | -0.10<br>(-0.46,<br>0.26)                    | 0.05<br>(-0.44,<br>0.54)                     |



Supplementary Material

|                |                       |                                |                             |                                |                                |                             |                             |                             |                             |                        |                        |                        |
|----------------|-----------------------|--------------------------------|-----------------------------|--------------------------------|--------------------------------|-----------------------------|-----------------------------|-----------------------------|-----------------------------|------------------------|------------------------|------------------------|
|                | <b>20:3n-6 (DGLA)</b> | -0.04<br>(-0.17, 0.1)          | 0.15<br>(-0.12, 0.42)       | 0.03<br>(-0.34, 0.39)          | <b>-0.60</b><br>(-0.94, -0.26) | -0.09<br>(-0.47, 0.29)      | -0.20<br>(-0.55, 0.15)      | -0.28<br>(-1.05, 0.48)      | -0.05<br>(-0.38, 0.29)      | 0.11<br>(-0.19, 0.42)  | 0.09<br>(-0.37, 0.55)  | -0.18<br>(-0.78, 0.41) |
|                | <b>20:4n-6 (ARA)</b>  | -0.08<br>(-0.21, 0.04)         | 0.21<br>(-0.05, 0.48)       | <b>-0.37</b><br>(-0.72, -0.02) | -0.02<br>(-0.35, 0.30)         | -0.09<br>(-0.45, 0.27)      | <b>0.64</b><br>(0.31, 0.98) | <b>1.06</b><br>(0.31, 1.81) | 0.07<br>(-0.25, 0.39)       | 0.11<br>(-0.18, 0.40)  | 0.31<br>(-0.12, 0.74)  | -0.38<br>(-0.94, 0.19) |
|                | <b>22:4n-6</b>        | 0.05<br>(-0.07, 0.17)          | <b>0.45</b><br>(0.20, 0.69) | -0.32<br>(-0.65, 0.01)         | <b>0.54</b><br>(0.23, 0.85)    | 0.10<br>(-0.25, 0.45)       | 0.29<br>(-0.04, 0.62)       | 0.36<br>(-0.37, 1.10)       | <b>0.40</b><br>(0.09, 0.70) | -0.09<br>(-0.39, 0.20) | -0.25<br>(-0.69, 0.20) | 0.09<br>(-0.49, 0.68)  |
|                | <b>22:5n-6</b>        | -0.06<br>(-0.18, 0.05)         | 0.08<br>(-0.16, 0.32)       | <b>-0.34</b><br>(-0.66, -0.01) | <b>0.46</b><br>(0.16, 0.76)    | <b>0.34</b><br>(0.00, 0.68) | <b>0.33</b><br>(0.02, 0.65) | 0.69<br>(-0.03, 1.41)       | 0.20<br>(-0.09, 0.50)       | 0.00<br>(-0.26, 0.26)  | 0.19<br>(-0.20, 0.59)  | -0.45<br>(-0.97, 0.07) |
|                | <b>Total n-6 PUFA</b> | 0.00<br>(-0.12, 0.12)          | 0.16<br>(-0.08, 0.39)       | 0.23<br>(-0.09, 0.55)          | <b>0.48</b><br>(0.18, 0.78)    | 0.06<br>(-0.28, 0.40)       | 0.17<br>(-0.14, 0.49)       | -0.61<br>(-1.32, 0.09)      | 0.20<br>(-0.09, 0.50)       | -0.12<br>(-0.39, 0.15) | 0.32<br>(-0.09, 0.72)  | 0.13<br>(-0.41, 0.68)  |
|                | <b>Ratios</b>         | <b>n-6:n-3 PUFA</b>            | -0.01<br>(-0.1, 0.08)       | 0.02<br>(-0.16, 0.21)          | 0.03<br>(-0.21, 0.28)          | 0.16<br>(-0.07, 0.39)       | -0.08<br>(-0.34, 0.18)      | 0.11<br>(-0.13, 0.36)       | 0.20<br>(-0.39, 0.79)       | 0.03<br>(-0.20, 0.25)  | -0.11<br>(-0.32, 0.11) | 0.07<br>(-0.25, 0.39)  |
| <b>ARA:DHA</b> |                       | <b>-0.23</b><br>(-0.38, -0.08) | <b>0.33</b><br>(0.03, 0.63) | -0.03<br>(-0.45, 0.39)         | <b>-0.79</b><br>(-1.18, -0.39) | -0.31<br>(-0.75, 0.12)      | -0.34<br>(-0.75, 0.06)      | 0.18<br>(-0.65, 1.01)       | 0.13<br>(-0.26, 0.52)       | -0.16<br>(-0.50, 0.18) | -0.42<br>(-0.93, 0.09) | 0.13<br>(-0.56, 0.81)  |

Supplementary Material

|                       |                  | Environmental Characteristics (95% CI) |                                           |                     |                     |
|-----------------------|------------------|----------------------------------------|-------------------------------------------|---------------------|---------------------|
|                       |                  | Smoking<br>(yes vs no)                 | Season of<br>delivery<br>(fall vs spring) | Summer vs<br>spring | Winter vs spring    |
| <b>Total Fat</b>      |                  | 0.40 (-0.12, 0.91)                     | -0.31 (-0.62, 0.00)                       | 0.00 (-0.32, 0.31)  | -0.13 (-0.42, 0.15) |
| Saturated fats (mol%) | <b>10:0</b>      | <b>1.46 (0.84, 2.08)</b>               | <b>-0.50 (-0.87, -0.13)</b>               | 0.27 (-0.07, 0.61)  | -0.01 (-0.33, 0.31) |
|                       | <b>12:0</b>      | <b>0.65 (0.11, 1.18)</b>               | <b>-0.54 (-0.87, -0.22)</b>               | -0.09 (-0.41, 0.24) | -0.11 (-0.41, 0.19) |
|                       | <b>14:0</b>      | 0.49 (-0.06, 1.05)                     | 0.11 (-0.24, 0.45)                        | 0.18 (-0.17, 0.53)  | 0.27 (-0.06, 0.59)  |
|                       | <b>16:0</b>      | 0.44 (-0.09, 0.96)                     | 0.13 (-0.20, 0.45)                        | 0.26 (-0.06, 0.59)  | 0.16 (-0.14, 0.45)  |
|                       | <b>18:0</b>      | 0.37 (-0.19, 0.93)                     | <b>0.63 (0.28, 0.97)</b>                  | 0.20 (-0.15, 0.54)  | 0.12 (-0.20, 0.43)  |
|                       | <b>20:0</b>      | -0.11 (-0.67, 0.44)                    | <b>0.55 (0.21, 0.88)</b>                  | 0.06 (-0.28, 0.4)   | 0.26 (-0.06, 0.57)  |
|                       | <b>21:0</b>      | 0.49 (-0.12, 1.09)                     | -0.14 (-0.53, 0.25)                       | 0.09 (-0.3, 0.49)   | -0.08 (-0.44, 0.29) |
|                       | <b>22:0</b>      | -0.12 (-0.63, 0.38)                    | 0.25 (-0.04, 0.54)                        | -0.23 (-0.52, 0.06) | -0.04 (-0.30, 0.23) |
|                       | <b>23:0</b>      | -0.27 (-0.83, 0.29)                    | -0.26 (-0.6, 0.08)                        | 0.05 (-0.29, 0.39)  | -0.16 (-0.47, 0.16) |
|                       | <b>24:0</b>      | 0.18 (-0.39, 0.74)                     | 0.13 (-0.23, 0.48)                        | -0.13 (-0.49, 0.22) | -0.06 (-0.39, 0.27) |
|                       | <b>Total SFA</b> | <b>0.80 (0.31, 1.30)</b>               | -0.04 (-0.35, 0.27)                       | 0.20 (-0.11, 0.50)  | 0.15 (-0.13, 0.44)  |
| Monounsaturated Fats  | <b>14:1n-5</b>   | 0.51 (-0.10, 1.12)                     | <b>-0.45 (-0.83, -0.07)</b>               | 0.25 (-0.13, 0.63)  | 0.02 (-0.34, 0.37)  |
|                       | <b>16:1n-7</b>   | 0.15 (-0.40, 0.69)                     | -0.11 (-0.44, 0.22)                       | 0.26 (-0.07, 0.59)  | -0.17 (-0.47, 0.13) |

## Supplementary Material

|                        |                       |                             |                     |                     |                             |
|------------------------|-----------------------|-----------------------------|---------------------|---------------------|-----------------------------|
|                        | <b>17:1n-7</b>        | 0.20 (-0.37, 0.76)          | -0.06 (-0.40, 0.29) | 0.29 (-0.06, 0.64)  | -0.10 (-0.43, 0.24)         |
|                        | <b>18:1n-7</b>        | -0.07 (-0.65, 0.50)         | 0.10 (-0.25, 0.44)  | 0.01 (-0.34, 0.35)  | <b>-0.36 (-0.68, -0.04)</b> |
|                        | <b>18:1n-9</b>        | -0.46 (-0.97, 0.05)         | 0.01 (-0.30, 0.33)  | -0.06 (-0.38, 0.25) | -0.18 (-0.47, 0.11)         |
|                        | <b>20:1n-9</b>        | -0.20 (-0.74, 0.35)         | 0.25 (-0.08, 0.58)  | -0.21 (-0.55, 0.12) | -0.23 (-0.53, 0.08)         |
|                        | <b>22:1n-9</b>        | 0.17 (-0.39, 0.73)          | 0.09 (-0.25, 0.44)  | -0.28 (-0.62, 0.07) | -0.26 (-0.59, 0.06)         |
|                        | <b>24:1n-9</b>        | 0.15 (-0.41, 0.71)          | 0.15 (-0.20, 0.49)  | -0.16 (-0.51, 0.18) | -0.18 (-0.50, 0.14)         |
|                        | <b>Total MUFA</b>     | -0.32 (-0.83, 0.20)         | 0.01 (-0.30, 0.33)  | -0.10 (-0.41, 0.22) | -0.25 (-0.54, 0.04)         |
| <b>n-3 PUFA (mol%)</b> | <b>18:3n-3 (ALA)</b>  | <b>-0.55 (-1.07, -0.03)</b> | -0.20 (-0.52, 0.11) | -0.15 (-0.46, 0.17) | 0.08 (-0.21, 0.37)          |
|                        | <b>20:3n-3</b>        | 0.07 (-0.48, 0.62)          | 0.09 (-0.25, 0.43)  | -0.28 (-0.62, 0.06) | -0.19 (-0.51, 0.12)         |
|                        | <b>20:5n-3 (EPA)</b>  | -0.31 (-0.87, 0.26)         | -0.02 (-0.37, 0.33) | 0.17 (-0.18, 0.51)  | 0.26 (-0.06, 0.58)          |
|                        | <b>22:5n-3 (DPA)</b>  | -0.07 (-0.60, 0.47)         | -0.21 (-0.53, 0.10) | 0.23 (-0.09, 0.54)  | 0.06 (-0.23, 0.35)          |
|                        | <b>22:6n-3 (DHA)</b>  | -0.25 (-0.83, 0.32)         | 0.06 (-0.30, 0.42)  | 0.11 (-0.25, 0.47)  | 0.14 (-0.19, 0.47)          |
|                        | <b>Total n-3 PUFA</b> | <b>-0.52 (-1.03, 0.00)</b>  | -0.12 (-0.43, 0.19) | -0.03 (-0.34, 0.28) | 0.01 (-0.14, 0.43)          |
| <b>n-6 PUFA (mol%)</b> | <b>18:2n-6 (LA)</b>   | <b>-0.77 (-1.31, -0.24)</b> | -0.02 (-0.35, 0.31) | -0.29 (-0.62, 0.04) | 0.06 (-0.25, 0.36)          |
|                        | <b>18:3n-6 (GLA)</b>  | -0.53 (-1.14, 0.07)         | -0.36 (-0.75, 0.03) | -0.02 (-0.41, 0.36) | -0.07 (-0.43, 0.29)         |
|                        | <b>20:2n-6</b>        | -0.05 (-0.54, 0.44)         | 0.25 (-0.03, 0.53)  | -0.05 (-0.34, 0.23) | -0.03 (-0.28, 0.23)         |
|                        | <b>20:3n-6 (DGLA)</b> | -0.15 (-0.74, 0.44)         | -0.22 (-0.59, 0.16) | -0.18 (-0.55, 0.20) | -0.21 (-0.56, 0.13)         |

Supplementary Material

|        |                       |                             |                          |                     |                     |
|--------|-----------------------|-----------------------------|--------------------------|---------------------|---------------------|
|        | <b>20:4n-6 (ARA)</b>  | <b>0.59 (0.01, 1.17)</b>    | -0.10 (-0.46, 0.26)      | 0.14 (-0.22, 0.51)  | 0.07 (-0.26, 0.41)  |
|        | <b>22:4n-6</b>        | 0.23 (-0.33, 0.80)          | <b>0.53 (0.19, 0.87)</b> | 0.02 (-0.32, 0.35)  | -0.12 (-0.43, 0.19) |
|        | <b>22:5n-6</b>        | 0.26 (-0.29, 0.81)          | 0.01 (-0.32, 0.35)       | -0.01 (-0.34, 0.33) | 0.09 (-0.22, 0.40)  |
|        | <b>Total n-6 PUFA</b> | <b>-0.74 (-1.27, -0.20)</b> | 0.08 (-0.25, 0.40)       | -0.31 (-0.63, 0.02) | 0.02 (-0.28, 0.32)  |
| Ratios | <b>n-6:n-3 PUFA</b>   | -0.07 (-0.50, 0.36)         | 0.13 (-0.12, 0.38)       | -0.14 (-0.39, 0.12) | 0.00 (-0.23, 0.23)  |
|        | <b>ARA:DHA</b>        | <b>0.86 (0.22, 1.51)</b>    | 0.01 (-0.43, 0.45)       | -0.05 (-0.49, 0.39) | -0.02 (-0.43, 0.39) |

<sup>1</sup>Unadjusted associations ( $\beta$  estimates and 95% CI) of infant, maternal, sociodemographic, or environmental factors with mother's milk fatty acid composition standard deviation scores. A negative sign indicates a negative association for continuous variables (gestational age, lactation stage, and maternal age) or lower than the listed reference value for categorical variables (all others).

Sample size is 100 mothers, 472 human milk samples. Associations were analyzed using PROC MIXED accounting for repeated measures using an autoregressive correlation structure. Estimates in **bold** type represent associations that remain significant after adjusting for multiple testing ( $p < 0.007$ ) while those in red are associated with  $p$ -values  $< 0.05$ .

Alpha linolenic acid (ALA), Arachidonic acid (ARA), Docosahexaenoic acid (DHA), Docosapentaenoic acid (DPA), Eicosapentaenoic acid (EPA), Female (F), Dihomo gamma linolenic acid (DGLA), Gamma linolenic acid (GLA), Linoleic acid (LA), Monounsaturated fatty acid (MUFA), Polyunsaturated fatty acid (PUFA), Saturated Fatty Acids (SFA), Standard deviation scores (SDS).

Supplementary Material

**Supplementary TABLE 2** - Detailed Results: Determinants of fat and fatty acid content of mother’s milk – adjusted Beta estimates (SDS) and 95% CI<sup>1</sup>

|                                   |                  | <b>Infant Characteristics (95% CI)</b>  |                             |                                            |                               |
|-----------------------------------|------------------|-----------------------------------------|-----------------------------|--------------------------------------------|-------------------------------|
|                                   |                  | <b>Gestational Age at Birth (weeks)</b> | <b>Infant Sex (vs F)</b>    | <b>Multiple birth (multiple vs single)</b> | <b>Lactation Stage (week)</b> |
| <b>Total Fat</b>                  |                  | 0.02 (-0.03, 0.06)                      | -0.08 (-0.28, 0.12)         | <b>-0.30 (-0.56, -0.05)</b>                | <b>0.06 (0.02, 0.09)</b>      |
| <b>Mono Saturated fats (mol%)</b> | <b>10:0</b>      | 0.00 (-0.05, 0.05)                      | 0.16 (-0.09, 0.40)          | -0.23 (-0.54, 0.07)                        | <b>-0.06 (-0.10, -0.02)</b>   |
|                                   | <b>12:0</b>      | <b>-0.07 (-0.12, -0.03)</b>             | <b>-0.23 (-0.44, -0.02)</b> | <b>-0.43 (-0.69, -0.17)</b>                | <b>-0.06 (-0.09, -0.02)</b>   |
|                                   | <b>14:0</b>      | <b>-0.07 (-0.11, -0.03)</b>             | <b>-0.24 (-0.45, -0.04)</b> | <b>-0.41 (-0.66, -0.16)</b>                | <b>-0.08 (-0.11, -0.05)</b>   |
|                                   | <b>16:0</b>      | 0.01 (-0.04, 0.05)                      | -0.11 (-0.33, 0.11)         | <b>-0.37 (-0.63, -0.12)</b>                | -0.03 (-0.06, 0.01)           |
|                                   | <b>18:0</b>      | -0.03 (-0.08, 0.02)                     | 0.13 (-0.10, 0.36)          | -0.04 (-0.33, 0.24)                        | <b>0.05 (0.01, 0.09)</b>      |
|                                   | <b>20:0</b>      | -0.03 (-0.08, 0.02)                     | 0.09 (-0.14, 0.32)          | -0.01 (-0.3, 0.29)                         | -0.01 (-0.05, 0.03)           |
|                                   | <b>21:0</b>      | <b>0.08 (0.02, 0.13)</b>                | 0.04 (-0.21, 0.29)          | 0.30 (-0.02, 0.62)                         | 0.01 (-0.02, 0.05)            |
|                                   | <b>22:0</b>      | -0.01 (-0.05, 0.04)                     | -0.02 (-0.23, 0.18)         | -0.11 (-0.37, 0.15)                        | 0.01 (-0.03, 0.05)            |
|                                   | <b>23:0</b>      | 0.01 (-0.03, 0.06)                      | 0.10 (-0.13, 0.32)          | -0.09 (-0.38, 0.20)                        | <b>-0.06 (-0.10, -0.02)</b>   |
|                                   | <b>24:0</b>      | <b>-0.06 (-0.10, -0.01)</b>             | 0.00 (-0.19, 0.20)          | -0.19 (-0.43, 0.06)                        | <b>-0.17 (-0.21, -0.14)</b>   |
|                                   | <b>Total SFA</b> | <b>-0.06 (-0.10, -0.02)</b>             | <b>-0.22 (-0.41, -0.03)</b> | <b>-0.54 (-0.76, -0.31)</b>                | <b>-0.06 (-0.09, -0.03)</b>   |
| <b>Mono</b>                       | <b>14:1n-5</b>   | -0.01 (-0.06, 0.03)                     | -0.18 (-0.39, 0.03)         | <b>-0.37 (-0.63, -0.12)</b>                | <b>0.04 (0.01, 0.07)</b>      |

## Supplementary Material

|                        |                       |                          |                             |                             |                             |
|------------------------|-----------------------|--------------------------|-----------------------------|-----------------------------|-----------------------------|
|                        | <b>16:1n-7</b>        | 0.01 (-0.04, 0.05)       | <b>-0.27 (-0.48, -0.07)</b> | <b>-0.36 (-0.62, -0.09)</b> | 0.03 (0.00, 0.07)           |
|                        | <b>17:1n-7</b>        | -0.04 (-0.09, 0.01)      | 0.06 (-0.18, 0.3)           | -0.20 (-0.50, 0.10)         | 0.03 (-0.01, 0.06)          |
|                        | <b>18:1n-7</b>        | <b>0.05 (0.01, 0.10)</b> | -0.10 (-0.3, 0.1)           | <b>0.30 (0.04, 0.55)</b>    | <b>-0.06 (-0.09, -0.02)</b> |
|                        | <b>18:1n-9</b>        | <b>0.06 (0.02, 0.10)</b> | <b>0.26 (0.07, 0.44)</b>    | <b>0.52 (0.30, 0.74)</b>    | <b>0.06 (0.03, 0.09)</b>    |
|                        | <b>20:1n-9</b>        | 0.01 (-0.03, 0.05)       | 0.08 (-0.11, 0.28)          | 0.21 (-0.03, 0.46)          | <b>-0.12 (-0.16, -0.09)</b> |
|                        | <b>22:1n-9</b>        | 0.00 (-0.04, 0.04)       | -0.04 (-0.22, 0.14)         | 0.09 (-0.13, 0.31)          | <b>-0.20 (-0.23, -0.17)</b> |
|                        | <b>24:1n-9</b>        | -0.03 (-0.06, 0.01)      | -0.10 (-0.27, 0.07)         | -0.06 (-0.27, 0.15)         | <b>-0.22 (-0.25, -0.19)</b> |
|                        | <b>Total MUFA</b>     | <b>0.05 (0.01, 0.09)</b> | <b>0.22 (0.04, 0.40)</b>    | <b>0.45 (0.23, 0.67)</b>    | <b>0.04 (0.01, 0.07)</b>    |
| <b>n-3 PUFA (mol%)</b> | <b>18:3n-3</b>        | 0.02 (-0.02, 0.07)       | 0.19 (-0.02, 0.40)          | 0.26 (0.00, 0.53)           | <b>0.06 (0.02, 0.09)</b>    |
|                        | <b>20:3n-3</b>        | -0.02 (-0.06, 0.02)      | -0.01 (-0.2, 0.18)          | 0.07 (-0.17, 0.31)          | <b>-0.18 (-0.21, -0.15)</b> |
|                        | <b>20:5n-3 (EPA)</b>  | 0.02 (-0.03, 0.07)       | 0.18 (-0.05, 0.42)          | 0.24 (-0.07, 0.54)          | 0.01 (-0.03, 0.04)          |
|                        | <b>22:5n-3 (DPA)</b>  | 0.03 (-0.02, 0.07)       | 0.02 (-0.21, 0.25)          | 0.22 (-0.07, 0.50)          | <b>-0.06 (-0.10, -0.02)</b> |
|                        | <b>22:6n-3 (DHA)</b>  | 0.05 (0.00, 0.10)        | -0.01 (-0.25, 0.22)         | 0.25 (-0.04, 0.54)          | <b>-0.10 (-0.14, -0.07)</b> |
|                        | <b>Total n-3 PUFA</b> | 0.04 (-0.01, 0.08)       | 0.09 (-0.12, 0.31)          | <b>0.34 (0.08, 0.61)</b>    | 0.02 (-0.02, 0.05)          |
| <b>n-6 PUFA (mol%)</b> | <b>18:2n-6 (LA)</b>   | 0.01 (-0.03, 0.06)       | 0.12 (-0.11, 0.34)          | 0.27 (0.00, 0.54)           | <b>0.06 (0.02, 0.09)</b>    |
|                        | <b>18:3n-6 (GLA)</b>  | 0.03 (-0.03, 0.08)       | 0.20 (-0.05, 0.45)          | 0.01 (-0.31, 0.32)          | <b>0.03 (0.00, 0.07)</b>    |
|                        | <b>20:2n-6</b>        | 0.00 (-0.04, 0.04)       | -0.07 (-0.27, 0.13)         | -0.06 (-0.31, 0.18)         | 0.00 (-0.04, 0.03)          |

Supplementary Material

|               |                       |                     |                     |                     |                             |
|---------------|-----------------------|---------------------|---------------------|---------------------|-----------------------------|
|               | <b>20:3n-6 (DGLA)</b> | 0.03 (-0.02, 0.08)  | -0.04 (-0.28, 0.19) | -0.13 (-0.43, 0.17) | <b>-0.14 (-0.17, -0.11)</b> |
|               | <b>20:4n-6 (ARA)</b>  | 0.05 (0.00, 0.09)   | -0.16 (-0.39, 0.07) | 0.22 (-0.07, 0.51)  | <b>-0.13 (-0.17, -0.10)</b> |
|               | <b>22:4n-6</b>        | 0.04 (-0.01, 0.09)  | -0.13 (-0.35, 0.09) | -0.07 (-0.35, 0.22) | <b>-0.06 (-0.10, -0.03)</b> |
|               | <b>22:5n-6</b>        | 0.00 (-0.04, 0.04)  | -0.16 (-0.35, 0.03) | -0.13 (-0.36, 0.11) | <b>-0.18 (-0.21, -0.14)</b> |
|               | <b>Total n-6 PUFA</b> | 0.02 (-0.03, 0.07)  | 0.08 (-0.15, 0.31)  | 0.22 (-0.05, 0.50)  | <b>0.04 (0.00, 0.07)</b>    |
| <b>Ratios</b> | <b>n-6:n-3 PUFA</b>   | -0.02 (-0.06, 0.02) | 0.12 (-0.06, 0.29)  | -0.14 (-0.36, 0.08) | 0.00 (-0.03, 0.04)          |
|               | <b>ARA:DHA</b>        | -0.01 (-0.07, 0.05) | -0.12 (-0.41, 0.16) | -0.13 (-0.49, 0.23) | <b>0.05 (0.03, 0.08)</b>    |

| <b>Maternal Characteristics (95% CI)</b> |                                                           |                             |                          |                                               |                                |                    |
|------------------------------------------|-----------------------------------------------------------|-----------------------------|--------------------------|-----------------------------------------------|--------------------------------|--------------------|
|                                          | <b>Maternal Pre-pregnancy BMI (Underweight vs normal)</b> | <b>Overweight vs normal</b> | <b>Obese vs normal</b>   | <b>Delivery method (Caesarean vs vaginal)</b> | <b>Maternal Age (/5 years)</b> |                    |
| <b>Total Fat</b>                         | -0.35 (-0.78, 0.08)                                       | <b>0.35 (0.10, 0.61)</b>    | <b>0.46 (0.16, 0.77)</b> | 0.05 (-0.17, 0.26)                            | 0.02 (-0.1, 0.13)              |                    |
| <b>Saturated fats (mol%)</b>             | <b>10:0</b>                                               | 0.54 (-0.02, 1.11)          | <b>0.57 (0.28, 0.86)</b> | -0.03 (-0.39, 0.34)                           | -0.01 (-0.27, 0.24)            | 0.11 (-0.02, 0.24) |
|                                          | <b>12:0</b>                                               | -0.31 (-0.75, 0.13)         | <b>0.27 (0.01, 0.53)</b> | 0.09 (-0.23, 0.40)                            | <b>-0.24 (-0.46, -0.02)</b>    | 0.10 (-0.02, 0.21) |
|                                          | <b>14:0</b>                                               | -0.06 (-0.49, 0.36)         | 0.11 (-0.15, 0.36)       | <b>0.43 (0.13, 0.74)</b>                      | <b>-0.30 (-0.50, -0.09)</b>    | 0.05 (-0.06, 0.17) |
|                                          | <b>16:0</b>                                               | -0.04 (-0.48, 0.4)          | 0.20 (-0.06, 0.46)       | <b>0.75 (0.44, 1.06)</b>                      | 0.05 (-0.17, 0.27)             | 0.10 (-0.01, 0.22) |

## Supplementary Material

|                             |                      |                          |                             |                             |                             |                             |
|-----------------------------|----------------------|--------------------------|-----------------------------|-----------------------------|-----------------------------|-----------------------------|
|                             | <b>18:0</b>          | <b>0.58 (0.11, 1.06)</b> | -0.20 (-0.48, 0.08)         | 0.18 (-0.16, 0.52)          | <b>-0.37 (-0.60, -0.14)</b> | -0.06 (-0.19, 0.06)         |
|                             | <b>20:0</b>          | 0.21 (-0.29, 0.70)       | -0.16 (-0.45, 0.13)         | -0.06 (-0.41, 0.29)         | -0.18 (-0.43, 0.07)         | 0.00 (-0.13, 0.13)          |
|                             | <b>21:0</b>          | -0.01 (-0.55, 0.53)      | -0.10 (-0.43, 0.22)         | <b>0.67 (0.29, 1.06)</b>    | 0.05 (-0.23, 0.32)          | 0.11 (-0.03, 0.26)          |
|                             | <b>22:0</b>          | -0.16 (-0.6, 0.28)       | -0.17 (-0.42, 0.09)         | -0.19 (-0.50, 0.12)         | -0.12 (-0.34, 0.10)         | 0.01 (-0.10, 0.12)          |
|                             | <b>23:0</b>          | 0.43 (-0.06, 0.92)       | 0.07 (-0.22, 0.36)          | <b>0.49 (0.14, 0.83)</b>    | -0.17 (-0.42, 0.07)         | 0.00 (-0.12, 0.13)          |
|                             | <b>24:0</b>          | -0.12 (-0.53, 0.30)      | -0.24 (-0.49, 0.00)         | 0.07 (-0.22, 0.37)          | -0.18 (-0.39, 0.03)         | -0.07 (-0.18, 0.04)         |
|                             | <b>Total SFA</b>     | -0.04 (-0.43, 0.35)      | 0.22 (-0.01, 0.45)          | <b>0.61 (0.33, 0.89)</b>    | <b>-0.29 (-0.48, -0.10)</b> | <b>0.11 (0.00, 0.21)</b>    |
| Monounsaturated Fats (mol%) | <b>14:1n-5</b>       | 0.01 (-0.41, 0.44)       | -0.06 (-0.32, 0.19)         | <b>0.70 (0.39, 1.01)</b>    | -0.15 (-0.37, 0.06)         | 0.09 (-0.02, 0.21)          |
|                             | <b>16:1n-7</b>       | <b>0.49 (0.05, 0.94)</b> | 0.09 (-0.17, 0.35)          | <b>0.38 (0.06, 0.70)</b>    | 0.05 (-0.18, 0.27)          | -0.06 (-0.18, 0.06)         |
|                             | <b>17:1n-7</b>       | 0.27 (-0.21, 0.76)       | 0.03 (-0.26, 0.33)          | <b>0.46 (0.09, 0.82)</b>    | <b>-0.27 (-0.51, -0.02)</b> | 0.09 (-0.04, 0.22)          |
|                             | <b>18:1n-7</b>       | 0.36 (-0.07, 0.79)       | 0.00 (-0.25, 0.25)          | 0.06 (-0.25, 0.36)          | <b>0.24 (0.03, 0.45)</b>    | <b>-0.13 (-0.24, -0.01)</b> |
|                             | <b>18:1n-9</b>       | 0.25 (-0.13, 0.64)       | <b>-0.32 (-0.55, -0.10)</b> | <b>-0.35 (-0.62, -0.07)</b> | <b>0.20 (0.01, 0.39)</b>    | -0.04 (-0.14, 0.06)         |
|                             | <b>20:1n-9</b>       | -0.16 (-0.57, 0.26)      | <b>-0.31 (-0.55, -0.07)</b> | -0.11 (-0.40, 0.19)         | 0.15 (-0.05, 0.35)          | -0.08 (-0.19, 0.03)         |
|                             | <b>22:1n-9</b>       | -0.11 (-0.48, 0.26)      | -0.16 (-0.38, 0.06)         | -0.03 (-0.29, 0.23)         | 0.03 (-0.15, 0.22)          | -0.02 (-0.12, 0.08)         |
|                             | <b>24:1n-9</b>       | 0.02 (-0.34, 0.37)       | -0.16 (-0.37, 0.05)         | 0.16 (-0.09, 0.42)          | 0.04 (-0.13, 0.22)          | -0.03 (-0.13, 0.06)         |
|                             | <b>Total MUFA</b>    | 0.25 (-0.13, 0.63)       | <b>-0.35 (-0.57, -0.13)</b> | -0.24 (-0.51, 0.03)         | 0.16 (-0.03, 0.35)          | -0.03 (-0.13, 0.07)         |
| n-3 PUFA (mol%)             | <b>18:3n-3</b>       | -0.22 (-0.67, 0.23)      | 0.03 (-0.24, 0.29)          | <b>-0.33 (-0.65, -0.01)</b> | 0.13 (-0.10, 0.35)          | -0.04 (-0.16, 0.08)         |
|                             | <b>20:3n-3</b>       | -0.16 (-0.55, 0.24)      | -0.04 (-0.27, 0.20)         | -0.03 (-0.31, 0.26)         | 0.04 (-0.16, 0.24)          | <b>-0.12 (-0.22, -0.01)</b> |
|                             | <b>20:5n-3 (EPA)</b> | -0.09 (-0.59, 0.41)      | 0.05 (-0.25, 0.35)          | -0.27 (-0.63, 0.09)         | -0.18 (-0.43, 0.08)         | 0.06 (-0.08, 0.19)          |



## Supplementary Material

|                        |                       |                     |                     |                             |                          |                             |
|------------------------|-----------------------|---------------------|---------------------|-----------------------------|--------------------------|-----------------------------|
|                        | <b>22:5n-3 (DPA)</b>  | 0.05 (-0.43, 0.53)  | 0.04 (-0.24, 0.33)  | -0.11 (-0.45, 0.23)         | 0.02 (-0.22, 0.26)       | 0.06 (-0.07, 0.18)          |
|                        | <b>22:6n-3 (DHA)</b>  | -0.23 (-0.71, 0.25) | -0.08 (-0.37, 0.21) | <b>-0.54 (-0.89, -0.2)</b>  | 0.01 (-0.24, 0.26)       | <b>0.16 (0.03, 0.29)</b>    |
|                        | <b>Total n-3 PUFA</b> | -0.36 (-0.81, 0.09) | 0.01 (-0.25, 0.27)  | <b>-0.42 (-0.74, -0.1)</b>  | 0.14 (-0.08, 0.37)       | 0.01 (-0.11, 0.12)          |
| <b>n-6 PUFA (mol%)</b> | <b>18:2n-6 (LA)</b>   | -0.31 (-0.76, 0.14) | 0.08 (-0.19, 0.34)  | <b>-0.61 (-0.93, -0.29)</b> | <b>0.25 (0.03, 0.47)</b> | <b>-0.12 (-0.24, 0.00)</b>  |
|                        | <b>18:3n-6 (GLA)</b>  | 0.45 (-0.07, 0.97)  | 0.20 (-0.11, 0.52)  | 0.07 (-0.31, 0.44)          | -0.10 (-0.37, 0.17)      | 0.08 (-0.06, 0.22)          |
|                        | <b>20:2n-6</b>        | -0.16 (-0.59, 0.26) | -0.09 (-0.33, 0.16) | -0.11 (-0.41, 0.20)         | -0.11 (-0.32, 0.10)      | 0.01 (-0.10, 0.12)          |
|                        | <b>20:3n-6 (DGLA)</b> | 0.29 (-0.21, 0.79)  | 0.07 (-0.23, 0.37)  | <b>0.47 (0.12, 0.83)</b>    | -0.06 (-0.32, 0.19)      | 0.04 (-0.09, 0.17)          |
|                        | <b>20:4n-6 (ARA)</b>  | 0.23 (-0.25, 0.71)  | -0.07 (-0.35, 0.22) | -0.02 (-0.36, 0.32)         | 0.22 (-0.02, 0.47)       | 0.01 (-0.12, 0.13)          |
|                        | <b>22:4n-6</b>        | 0.09 (-0.40, 0.57)  | -0.11 (-0.4, 0.17)  | -0.09 (-0.43, 0.26)         | 0.07 (-0.17, 0.32)       | 0.06 (-0.07, 0.19)          |
|                        | <b>22:5n-6</b>        | -0.05 (-0.45, 0.36) | -0.02 (-0.26, 0.21) | <b>-0.30 (-0.59, -0.02)</b> | 0.09 (-0.11, 0.29)       | -0.03 (-0.13, 0.08)         |
|                        | <b>Total n-6 PUFA</b> | -0.32 (-0.78, 0.14) | 0.04 (-0.24, 0.31)  | <b>-0.61 (-0.94, -0.28)</b> | 0.20 (-0.02, 0.43)       | -0.11 (-0.23, 0.01)         |
| <b>Ratios</b>          | <b>n-6:n-3 PUFA</b>   | 0.06 (-0.31, 0.43)  | -0.07 (-0.28, 0.15) | -0.13 (-0.39, 0.14)         | -0.02 (-0.21, 0.16)      | -0.05 (-0.15, 0.05)         |
|                        | <b>ARA:DHA</b>        | 0.44 (-0.15, 1.03)  | 0.03 (-0.32, 0.39)  | <b>0.62 (0.20, 1.05)</b>    | 0.10 (-0.21, 0.40)       | <b>-0.24 (-0.39, -0.08)</b> |

## Supplementary Material

|                       |                  | Sociodemographic Characteristics (95% CI) |                                                    |                                                           |                                  |                                          |                                    |                                     |                          |
|-----------------------|------------------|-------------------------------------------|----------------------------------------------------|-----------------------------------------------------------|----------------------------------|------------------------------------------|------------------------------------|-------------------------------------|--------------------------|
|                       |                  | Parity (>1 vs 1)                          | Maternal Education (post-secondary degree vs none) | Maternal Ethnicity (East and Southeast Asian vs European) | South and West Asian vs European | African, Caribbean and Other vs European | Income (below poverty line Vs not) | English spoken at home (y vs mixed) | English vs no English    |
|                       | <b>Total Fat</b> | <b>0.25 (0.04, 0.47)</b>                  | 0.05 (-0.25, 0.36)                                 | -0.09 (-0.36, 0.19)                                       | 0.02 (-0.31, 0.36)               | -0.03 (-0.33, 0.27)                      | <b>0.42 (0.14, 0.71)</b>           | -0.04 (-0.29, 0.21)                 | -0.10 (-0.46, 0.26)      |
| Saturated fats (mol%) | <b>10:0</b>      | 0.13 (-0.13, 0.39)                        | -0.15 (-0.52, 0.22)                                | -0.11 (-0.43, 0.21)                                       | -0.35 (-0.74, 0.03)              | 0.08 (-0.28, 0.43)                       | -0.18 (-0.52, 0.16)                | -0.15 (-0.44, 0.15)                 | -0.30 (-0.75, 0.15)      |
|                       | <b>12:0</b>      | -0.05 (-0.28, 0.17)                       | 0.06 (-0.26, 0.37)                                 | -0.22 (-0.5, 0.07)                                        | 0.29 (-0.06, 0.64)               | <b>0.49 (0.18, 0.79)</b>                 | 0.22 (-0.08, 0.51)                 | 0.01 (-0.23, 0.25)                  | -0.25 (-0.6, 0.11)       |
|                       | <b>14:0</b>      | 0.15 (-0.07, 0.37)                        | 0.11 (-0.20, 0.41)                                 | -0.25 (-0.53, 0.03)                                       | <b>0.72 (0.39, 1.06)</b>         | <b>0.68 (0.38, 0.97)</b>                 | <b>0.45 (0.16, 0.73)</b>           | 0.16 (-0.07, 0.39)                  | -0.10 (-0.45, 0.24)      |
|                       | <b>16:0</b>      | 0.01 (-0.21, 0.23)                        | <b>-0.49 (-0.81, -0.18)</b>                        | 0.15 (-0.14, 0.43)                                        | <b>0.64 (0.30, 0.99)</b>         | 0.15 (-0.15, 0.45)                       | -0.12 (-0.41, 0.17)                | 0.19 (-0.06, 0.45)                  | -0.22 (-0.60, 0.16)      |
|                       | <b>18:0</b>      | 0.14 (-0.10, 0.39)                        | <b>-0.40 (-0.74, -0.06)</b>                        | 0.11 (-0.20, 0.42)                                        | -0.17 (-0.54, 0.20)              | 0.13 (-0.19, 0.46)                       | -0.25 (-0.57, 0.06)                | 0.23 (-0.04, 0.51)                  | -0.18 (-0.60, 0.23)      |
|                       | <b>20:0</b>      | <b>-0.27 (-0.52, -0.02)</b>               | -0.15 (-0.50, 0.20)                                | 0.01 (-0.31, 0.33)                                        | 0.10 (-0.29, 0.48)               | 0.04 (-0.3, 0.38)                        | <b>-0.37 (-0.69, -0.04)</b>        | -0.14 (-0.42, 0.15)                 | -0.12 (-0.54, 0.31)      |
|                       | <b>21:0</b>      | 0.23 (-0.05, 0.51)                        | 0.20 (-0.18, 0.59)                                 | -0.11 (-0.46, 0.25)                                       | -0.12 (-0.55, 0.31)              | -0.02 (-0.4, 0.35)                       | 0.02 (-0.34, 0.39)                 | 0.20 (-0.11, 0.50)                  | 0.28 (-0.18, 0.74)       |
|                       | <b>22:0</b>      | -0.18 (-0.40, 0.04)                       | -0.02 (-0.33, 0.29)                                | 0.14 (-0.14, 0.41)                                        | 0.17 (-0.17, 0.51)               | 0.13 (-0.17, 0.43)                       | -0.23 (-0.52, 0.06)                | -0.19 (-0.46, 0.07)                 | -0.20 (-0.59, 0.19)      |
|                       | <b>23:0</b>      | 0.13 (-0.12, 0.38)                        | 0.24 (-0.11, 0.59)                                 | <b>-0.62 (-0.93, -0.30)</b>                               | -0.13 (-0.51, 0.25)              | -0.28 (-0.62, 0.05)                      | 0.12 (-0.20, 0.45)                 | 0.24 (-0.03, 0.50)                  | <b>0.56 (0.16, 0.95)</b> |
|                       | <b>24:0</b>      | <b>-0.24 (-0.45, -0.03)</b>               | 0.14 (-0.15, 0.44)                                 | -0.09 (-0.36, 0.18)                                       | <b>0.33 (0.00, 0.65)</b>         | 0.26 (-0.03, 0.54)                       | -0.12 (-0.40, 0.15)                | -0.07 (-0.32, 0.17)                 | -0.10 (-0.46, 0.26)      |
|                       |                  | <b>Total SFA</b>                          | 0.07 (-0.13, 0.27)                                 | -0.22 (-0.50, 0.06)                                       | -0.14 (-0.4, 0.11)               | <b>0.68 (0.38, 0.99)</b>                 | <b>0.58 (0.32, 0.85)</b>           | 0.15 (-0.11, 0.41)                  | 0.20 (-0.02, 0.42)       |

## Supplementary Material

|                             |                       |                             |                            |                             |                             |                             |                             |                          |                     |
|-----------------------------|-----------------------|-----------------------------|----------------------------|-----------------------------|-----------------------------|-----------------------------|-----------------------------|--------------------------|---------------------|
| Monounsaturated Fats (mol%) | <b>14:1n-5</b>        | -0.03 (-0.25, 0.19)         | 0.02 (-0.28, 0.33)         | <b>-0.85 (-1.14, -0.57)</b> | 0.02 (-0.32, 0.35)          | <b>-0.64 (-0.93, -0.34)</b> | <b>-0.29 (-0.57, 0.00)</b>  | 0.07 (-0.18, 0.33)       | -0.26 (-0.64, 0.11) |
|                             | <b>16:1n-7</b>        | 0.09 (-0.14, 0.31)          | <b>-0.32 (-0.63, 0.00)</b> | 0.13 (-0.16, 0.42)          | <b>-0.37 (-0.72, -0.03)</b> | <b>-0.58 (-0.88, -0.27)</b> | -0.14 (-0.43, 0.16)         | 0.14 (-0.12, 0.4)        | -0.31 (-0.7, 0.08)  |
|                             | <b>17:1n-7</b>        | 0.16 (-0.09, 0.41)          | -0.10 (-0.46, 0.26)        | -0.13 (-0.45, 0.20)         | -0.33 (-0.72, 0.06)         | <b>-0.56 (-0.90, -0.21)</b> | <b>-0.47 (-0.81, -0.14)</b> | 0.19 (-0.09, 0.48)       | -0.37 (-0.8, 0.05)  |
|                             | <b>18:1n-7</b>        | -0.04 (-0.26, 0.18)         | -0.06 (-0.36, 0.25)        | <b>0.75 (0.47, 1.03)</b>    | <b>-0.54 (-0.87, -0.20)</b> | -0.13 (-0.42, 0.17)         | -0.15 (-0.44, 0.13)         | 0.02 (-0.23, 0.26)       | 0.14 (-0.22, 0.50)  |
|                             | <b>18:1n-9</b>        | <b>-0.25 (-0.44, -0.06)</b> | 0.16 (-0.11, 0.44)         | -0.17 (-0.41, 0.08)         | <b>-0.76 (-1.06, -0.46)</b> | <b>-0.66 (-0.93, -0.40)</b> | <b>-0.31 (-0.57, -0.06)</b> | -0.12 (-0.33, 0.10)      | 0.28 (-0.03, 0.60)  |
|                             | <b>20:1n-9</b>        | <b>-0.30 (-0.50, -0.09)</b> | 0.18 (-0.12, 0.47)         | <b>0.41 (0.15, 0.68)</b>    | -0.03 (-0.35, 0.29)         | 0.04 (-0.24, 0.32)          | <b>-0.39 (-0.66, -0.11)</b> | -0.23 (-0.47, 0.01)      | 0.08 (-0.28, 0.43)  |
|                             | <b>22:1n-9</b>        | <b>-0.23 (-0.41, -0.04)</b> | -0.02 (-0.28, 0.24)        | <b>0.26 (0.02, 0.50)</b>    | <b>0.29 (0.01, 0.58)</b>    | 0.19 (-0.07, 0.44)          | <b>-0.32 (-0.56, -0.07)</b> | -0.11 (-0.32, 0.10)      | -0.03 (-0.34, 0.28) |
|                             | <b>24:1n-9</b>        | -0.11 (-0.30, 0.07)         | 0.13 (-0.12, 0.38)         | <b>0.25 (0.02, 0.48)</b>    | <b>0.29 (0.01, 0.57)</b>    | 0.23 (-0.01, 0.48)          | -0.12 (-0.36, 0.11)         | 0.05 (-0.16, 0.25)       | -0.03 (-0.33, 0.27) |
|                             | <b>Total MUFA</b>     | -0.17 (-0.36, 0.03)         | 0.05 (-0.22, 0.32)         | -0.09 (-0.33, 0.16)         | <b>-0.78 (-1.07, -0.48)</b> | <b>-0.65 (-0.91, -0.39)</b> | <b>-0.40 (-0.65, -0.14)</b> | -0.10 (-0.32, 0.11)      | 0.18 (-0.13, 0.50)  |
| n-3 PUFA (mol%)             | <b>18:3n-3</b>        | 0.13 (-0.09, 0.36)          | <b>0.35 (0.03, 0.67)</b>   | 0.03 (-0.26, 0.32)          | 0.02 (-0.33, 0.37)          | -0.11 (-0.41, 0.20)         | 0.14 (-0.16, 0.44)          | -0.14 (-0.40, 0.13)      | 0.32 (-0.07, 0.70)  |
|                             | <b>20:3n-3</b>        | 0.08 (-0.12, 0.29)          | 0.16 (-0.12, 0.44)         | <b>0.48 (0.22, 0.74)</b>    | <b>0.36 (0.05, 0.68)</b>    | <b>0.35 (0.08, 0.63)</b>    | 0.10 (-0.16, 0.37)          | 0.02 (-0.22, 0.25)       | 0.11 (-0.24, 0.46)  |
|                             | <b>20:5n-3 (EPA)</b>  | -0.09 (-0.34, 0.16)         | 0.02 (-0.34, 0.38)         | -0.32 (-0.65, 0.01)         | -0.13 (-0.52, 0.27)         | -0.25 (-0.60, 0.10)         | -0.16 (-0.49, 0.17)         | 0.14 (-0.16, 0.45)       | 0.34 (-0.12, 0.79)  |
|                             | <b>22:5n-3 (DPA)</b>  | 0.02 (-0.23, 0.26)          | 0.06 (-0.28, 0.40)         | 0.18 (-0.13, 0.49)          | 0.14 (-0.24, 0.51)          | 0.08 (-0.25, 0.41)          | -0.02 (-0.34, 0.30)         | 0.17 (-0.11, 0.45)       | 0.26 (-0.15, 0.68)  |
|                             | <b>22:6n-3 (DHA)</b>  | -0.14 (-0.38, 0.10)         | -0.26 (-0.61, 0.09)        | <b>0.46 (0.14, 0.78)</b>    | 0.09 (-0.29, 0.47)          | 0.21 (-0.12, 0.55)          | -0.22 (-0.55, 0.10)         | <b>0.39 (0.11, 0.68)</b> | 0.34 (-0.08, 0.77)  |
|                             | <b>Total n-3 PUFA</b> | 0.06 (-0.17, 0.29)          | 0.18 (-0.14, 0.5)          | 0.10 (-0.18, 0.39)          | 0.11 (-0.24, 0.46)          | -0.06 (-0.37, 0.24)         | 0.04 (-0.26, 0.33)          | -0.03 (-0.29, 0.23)      | 0.23 (-0.16, 0.61)  |

## Supplementary Material

|                 |                       |                          |                             |                             |                             |                             |                          |                          |                          |
|-----------------|-----------------------|--------------------------|-----------------------------|-----------------------------|-----------------------------|-----------------------------|--------------------------|--------------------------|--------------------------|
| n-6 PUFA (mol%) | <b>18:2n-6 (LA)</b>   | 0.15 (-0.08, 0.38)       | 0.19 (-0.14, 0.51)          | 0.25 (-0.04, 0.54)          | -0.14 (-0.49, 0.22)         | -0.10 (-0.41, 0.21)         | 0.22 (-0.08, 0.52)       | -0.19 (-0.46, 0.08)      | 0.18 (-0.23, 0.58)       |
|                 | <b>18:3n-6 (GLA)</b>  | 0.08 (-0.19, 0.36)       | 0.07 (-0.31, 0.44)          | <b>-0.87 (-1.22, -0.52)</b> | <b>-0.66 (-1.07, -0.24)</b> | <b>-0.63 (-1.00, -0.27)</b> | -0.09 (-0.44, 0.26)      | -0.05 (-0.36, 0.25)      | <b>0.52 (0.07, 0.98)</b> |
|                 | <b>20:2n-6</b>        | -0.04 (-0.25, 0.18)      | 0.01 (-0.29, 0.31)          | <b>0.27 (0.00, 0.54)</b>    | 0.08 (-0.25, 0.41)          | 0.08 (-0.21, 0.37)          | -0.09 (-0.37, 0.2)       | -0.14 (-0.40, 0.12)      | -0.17 (-0.55, 0.22)      |
|                 | <b>20:3n-6 (DGLA)</b> | 0.13 (-0.12, 0.39)       | 0.15 (-0.21, 0.50)          | <b>-0.52 (-0.85, -0.19)</b> | -0.10 (-0.50, 0.29)         | -0.20 (-0.55, 0.15)         | 0.08 (-0.25, 0.42)       | 0.09 (-0.20, 0.39)       | 0.30 (-0.14, 0.75)       |
|                 | <b>20:4n-6 (ARA)</b>  | 0.24 (-0.01, 0.48)       | -0.13 (-0.47, 0.21)         | 0.01 (-0.31, 0.32)          | -0.08 (-0.46, 0.30)         | <b>0.61 (0.28, 0.94)</b>    | 0.03 (-0.29, 0.35)       | <b>0.31 (0.03, 0.58)</b> | 0.35 (-0.06, 0.76)       |
|                 | <b>22:4n-6</b>        | <b>0.43 (0.19, 0.67)</b> | -0.22 (-0.56, 0.12)         | <b>0.51 (0.19, 0.82)</b>    | 0.04 (-0.34, 0.41)          | 0.18 (-0.15, 0.51)          | <b>0.34 (0.02, 0.66)</b> | 0.03 (-0.26, 0.33)       | -0.23 (-0.67, 0.21)      |
|                 | <b>22:5n-6</b>        | 0.04 (-0.16, 0.24)       | <b>-0.30 (-0.59, -0.02)</b> | <b>0.45 (0.20, 0.71)</b>    | 0.30 (-0.02, 0.61)          | 0.18 (-0.1, 0.45)           | 0.06 (-0.21, 0.32)       | 0.09 (-0.13, 0.32)       | 0.22 (-0.12, 0.56)       |
|                 | <b>Total n-6 PUFA</b> | 0.16 (-0.07, 0.40)       | 0.18 (-0.15, 0.51)          | <b>0.35 (0.05, 0.64)</b>    | -0.10 (-0.47, 0.26)         | -0.04 (-0.36, 0.27)         | 0.19 (-0.11, 0.50)       | -0.23 (-0.50, 0.05)      | 0.13 (-0.27, 0.54)       |
| Ratios          | <b>n-6:n-3 PUFA</b>   | 0.03 (-0.16, 0.22)       | 0.08 (-0.18, 0.34)          | 0.13 (-0.1, 0.37)           | -0.11 (-0.40, 0.18)         | 0.14 (-0.11, 0.40)          | 0.05 (-0.19, 0.30)       | -0.09 (-0.31, 0.14)      | 0.00 (-0.34, 0.33)       |
|                 | <b>ARA:DHA</b>        | <b>0.30 (0.01, 0.59)</b> | 0.11 (-0.30, 0.53)          | <b>-0.77 (-1.17, -0.37)</b> | -0.34 (-0.81, 0.13)         | -0.15 (-0.56, 0.26)         | 0.28 (-0.12, 0.67)       | -0.13 (-0.46, 0.21)      | -0.24 (-0.75, 0.26)      |

## Supplementary Material

|                             |                | Environmental Characteristics (95% CI) |                          |                     |
|-----------------------------|----------------|----------------------------------------|--------------------------|---------------------|
|                             |                | Season of delivery (fall vs spring)    | Summer vs spring         | Winter vs spring    |
| <b>Total Fat</b>            |                | <b>-0.32 (-0.64, 0.00)</b>             | 0.01 (-0.29, 0.32)       | -0.27 (-0.55, 0.00) |
| Monounsaturated fats (mol%) | <b>10:0</b>    | <b>-0.53 (-0.91, -0.15)</b>            | 0.32 (-0.01, 0.66)       | 0.00 (-0.31, 0.30)  |
|                             | <b>12:0</b>    | <b>-0.45 (-0.78, -0.13)</b>            | -0.03 (-0.35, 0.28)      | -0.10 (-0.39, 0.19) |
|                             | <b>14:0</b>    | <b>0.32 (0.00, 0.64)</b>               | 0.19 (-0.12, 0.50)       | 0.28 (0.00, 0.56)   |
|                             | <b>16:0</b>    | 0.23 (-0.09, 0.55)                     | <b>0.47 (0.15, 0.78)</b> | 0.06 (-0.22, 0.34)  |
|                             | <b>18:0</b>    | <b>0.50 (0.15, 0.86)</b>               | 0.19 (-0.16, 0.53)       | 0.03 (-0.28, 0.34)  |
|                             | <b>20:0</b>    | <b>0.61 (0.25, 0.98)</b>               | 0.14 (-0.22, 0.49)       | 0.27 (-0.05, 0.59)  |
|                             | <b>21:0</b>    | -0.16 (-0.57, 0.25)                    | 0.06 (-0.34, 0.45)       | -0.12 (-0.48, 0.24) |
|                             | <b>22:0</b>    | 0.28 (-0.04, 0.60)                     | -0.18 (-0.49, 0.13)      | 0.01 (-0.27, 0.3)   |
|                             | <b>23:0</b>    | -0.11 (-0.48, 0.25)                    | 0.00 (-0.36, 0.35)       | -0.23 (-0.54, 0.09) |
|                             | <b>24:0</b>    | <b>0.31 (0.01, 0.61)</b>               | -0.05 (-0.35, 0.24)      | 0.09 (-0.17, 0.36)  |
| <b>Total SFA</b>            |                | 0.13 (-0.16, 0.42)                     | <b>0.32 (0.03, 0.60)</b> | 0.09 (-0.16, 0.35)  |
| Monounsaturated Fats        | <b>14:1n-5</b> | -0.28 (-0.59, 0.03)                    | 0.29 (-0.01, 0.60)       | -0.15 (-0.42, 0.13) |
|                             | <b>16:1n-7</b> | -0.22 (-0.54, 0.10)                    | 0.26 (-0.06, 0.57)       | -0.26 (-0.54, 0.02) |

## Supplementary Material

|                        |                       |                          |                            |                          |
|------------------------|-----------------------|--------------------------|----------------------------|--------------------------|
|                        | <b>17:1n-7</b>        | -0.06 (-0.41, 0.30)      | 0.32 (-0.03, 0.67)         | -0.19 (-0.52, 0.13)      |
|                        | <b>18:1n-7</b>        | -0.14 (-0.46, 0.19)      | -0.05 (-0.36, 0.26)        | -0.27 (-0.55, 0.01)      |
|                        | <b>18:1n-9</b>        | -0.11 (-0.39, 0.18)      | -0.14 (-0.42, 0.14)        | -0.16 (-0.41, 0.09)      |
|                        | <b>20:1n-9</b>        | 0.24 (-0.07, 0.54)       | -0.19 (-0.49, 0.10)        | -0.02 (-0.29, 0.25)      |
|                        | <b>22:1n-9</b>        | 0.23 (-0.04, 0.50)       | -0.15 (-0.42, 0.11)        | -0.03 (-0.27, 0.2)       |
|                        | <b>24:1n-9</b>        | <b>0.27 (0.02, 0.53)</b> | -0.10 (-0.35, 0.15)        | 0.01 (-0.21, 0.24)       |
|                        | <b>Total MUFA</b>     | -0.15 (-0.43, 0.14)      | -0.17 (-0.45, 0.10)        | -0.23 (-0.48, 0.02)      |
| <b>n-3 PUFA (mol%)</b> | <b>18:3n-3</b>        | -0.22 (-0.55, 0.10)      | -0.23 (-0.55, 0.09)        | 0.10 (-0.19, 0.38)       |
|                        | <b>20:3n-3</b>        | 0.15 (-0.14, 0.44)       | <b>-0.29 (-0.57, 0.00)</b> | -0.01 (-0.27, 0.24)      |
|                        | <b>20:5n-3 (EPA)</b>  | 0.08 (-0.29, 0.45)       | 0.12 (-0.24, 0.47)         | 0.29 (-0.03, 0.61)       |
|                        | <b>22:5n-3 (DPA)</b>  | -0.22 (-0.56, 0.13)      | 0.19 (-0.14, 0.53)         | 0.13 (-0.17, 0.44)       |
|                        | <b>22:6n-3 (DHA)</b>  | 0.00 (-0.36, 0.35)       | 0.08 (-0.26, 0.43)         | <b>0.32 (0.00, 0.63)</b> |
|                        | <b>Total n-3 PUFA</b> | -0.12 (-0.44, 0.21)      | -0.09 (-0.41, 0.22)        | 0.21 (-0.07, 0.50)       |
| <b>n-6 PUFA (mol%)</b> | <b>18:2n-6 (LA)</b>   | -0.12 (-0.45, 0.21)      | <b>-0.38 (-0.7, -0.06)</b> | 0.10 (-0.19, 0.39)       |
|                        | <b>18:3n-6 (GLA)</b>  | -0.31 (-0.71, 0.09)      | -0.10 (-0.48, 0.29)        | -0.18 (-0.52, 0.17)      |
|                        | <b>20:2n-6</b>        | 0.24 (-0.07, 0.55)       | -0.04 (-0.35, 0.26)        | 0.02 (-0.25, 0.30)       |

Supplementary Material

|               |                       |                          |                             |                          |
|---------------|-----------------------|--------------------------|-----------------------------|--------------------------|
|               | <b>20:3n-6 (DGLA)</b> | -0.07 (-0.45, 0.31)      | -0.19 (-0.55, 0.18)         | -0.22 (-0.55, 0.12)      |
|               | <b>20:4n-6 (ARA)</b>  | -0.17 (-0.52, 0.19)      | 0.10 (-0.24, 0.45)          | 0.19 (-0.13, 0.50)       |
|               | <b>22:4n-6</b>        | <b>0.41 (0.06, 0.77)</b> | -0.03 (-0.37, 0.32)         | -0.07 (-0.38, 0.24)      |
|               | <b>22:5n-6</b>        | -0.02 (-0.32, 0.27)      | 0.00 (-0.28, 0.29)          | <b>0.26 (0.01, 0.52)</b> |
|               | <b>Total n-6 PUFA</b> | -0.02 (-0.36, 0.32)      | <b>-0.39 (-0.72, -0.06)</b> | 0.09 (-0.21, 0.39)       |
| <b>Ratios</b> | <b>n-6:n-3 PUFA</b>   | 0.08 (-0.20, 0.35)       | -0.15 (-0.42, 0.12)         | 0.04 (-0.20, 0.28)       |
|               | <b>ARA:DHA</b>        | -0.01 (-0.46, 0.44)      | -0.13 (-0.56, 0.31)         | -0.16 (-0.56, 0.23)      |

<sup>1</sup>Adjusted associations ( $\beta$  estimates) of infant, maternal, sociodemographic, or environmental factors with mother's milk fatty acid composition standard deviation scores. Associations were analyzed using PROC MIXED accounting for repeated measures using an autoregressive correlation structure, adjusting for maternal pre-pregnancy BMI (underweight [ $<18.5 \text{ kg/m}^2$ ], normal weight [18.6-24.9], overweight [25.0-29.9] or obese [ $\geq 30$ ]), maternal education (post-secondary vs none), maternal ethnicity (East or Southeast Asian, South or West Asian European, African or Caribbean, or Other), family income above or below the family size-adjusted Ontario poverty line (y/n), smoking (y/n), and timing of sample collection (weeks). A negative sign indicates a negative association for continuous variables (gestational age, lactation stage, and maternal age) or lower than the listed reference value for categorical variables (all others). Sample size is 99 mothers, 469 human milk samples (one subject not included from the unadjusted due to

Hopperton *et al.* Determinants of fatty acid content and composition of human milk fed to infants born <1250g - Online

Supplementary Material

missing covariate data). Estimates in **bold** type represent associations that remain significant after adjusting for multiple testing ( $p < 0.007$ ) while those in red are associated with p-values  $< 0.05$ .

Alpha linolenic acid (ALA), Arachidonic acid (ARA), Docosahexaenoic acid (DHA), Docosapentaenoic acid (DPA), Eicosapentaenoic acid (EPA), Female (F), Dihomo gamma linolenic acid (DGLA), Gamma linolenic acid (GLA), Linoleic acid (LA), Monounsaturated fatty acid (MUFA), Polyunsaturated fatty acid (PUFA), Saturated Fatty Acids (SFA), Standard deviation scores (SDS).



Supplementary Material

**Supplementary TABLE 3** – Determinants of fat and fatty acid content of mother’s milk – unadjusted, unstandardized data (mol% of total quantified fatty acids)<sup>1</sup>

|                            |                  | Fat -<br>g/dl<br>(95%<br>CI)                    | Saturated fats - mol% (95% CI)            |                                           |                                           |                            |                                                 |                           |                                                 |                          |                                           |                                           | Total<br>SFA                              |
|----------------------------|------------------|-------------------------------------------------|-------------------------------------------|-------------------------------------------|-------------------------------------------|----------------------------|-------------------------------------------------|---------------------------|-------------------------------------------------|--------------------------|-------------------------------------------|-------------------------------------------|-------------------------------------------|
|                            |                  |                                                 | 10:0                                      | 12:0                                      | 14:0                                      | 16:0                       | 18:0                                            | 20:0                      | 21:0                                            | 22:0                     | 23:0                                      | 24:0                                      |                                           |
| <b>Gestational<br/>Age</b> | <i>Intercept</i> | 4.33<br>(3.02,<br>5.63)                         | 0.08<br>(-0.42,<br>0.58)                  | 9.24<br>(6.27,<br>12.21)                  | 13.13<br>(9.56,<br>16.70)                 | 19.97<br>(16.73,<br>23.22) | 5.94<br>(4.43,<br>7.44)                         | 0.17<br>(0.12,<br>0.22)   | -0.02<br>(-0.11,<br>0.06)                       | 0.07<br>(0.00,<br>0.14)  | 0.10<br>(0.01,<br>0.18)                   | 0.09<br>(0.05,<br>0.14)                   | 49.60<br>(42.55,<br>56.64)                |
|                            | $\beta$ /week    | -0.02<br>(-0.07,<br>0.03)                       | 0.01<br>(-0.01,<br>0.03)                  | <b>-0.17</b><br>(-0.27,<br><b>-0.06</b> ) | <b>-0.20</b><br>(-0.33,<br><b>-0.07</b> ) | 0.05<br>(-0.07,<br>0.17)   | -0.01<br>(-0.06,<br>0.05)                       | -0.00<br>(-0.00,<br>0.00) | <b>0.00</b><br>( <b>0.00</b> ,<br><b>0.01</b> ) | 0.00<br>(-0.00,<br>0.00) | 0.00<br>(-0.00,<br>0.00)                  | -0.00<br>(-0.00,<br>0.00)                 | <b>-0.32</b><br>(-0.58,<br><b>-0.07</b> ) |
|                            | <i>Female</i>    | 3.76<br>(3.61,<br>3.91)                         | 0.25<br>(0.20,<br>0.30)                   | 4.63<br>(4.29,<br>4.97)                   | 7.55<br>(7.13,<br>7.97)                   | 20.97<br>(20.58,<br>21.36) | 5.63<br>(5.45,<br>5.80)                         | 0.16<br>(0.16,<br>0.17)   | 0.09<br>(0.08,<br>0.10)                         | 0.07<br>(0.06,<br>0.08)  | 0.12<br>(0.11,<br>0.13)                   | 0.08<br>(0.07,<br>0.08)                   | 40.15<br>(39.31,<br>41.00)                |
| <b>Infant Sex</b>          | <i>Male</i>      | 3.81<br>(3.64,<br>3.98)                         | 0.33<br>(0.26,<br>0.39)                   | 4.55<br>(4.17,<br>4.94)                   | 7.53<br>(7.06,<br>8.01)                   | 21.35<br>(20.91,<br>21.79) | 5.79<br>(5.59,<br>5.98)                         | 0.16<br>(0.16,<br>0.17)   | 0.09<br>(0.08,<br>0.10)                         | 0.07<br>(0.06,<br>0.08)  | 0.12<br>(0.11,<br>0.14)                   | 0.08<br>(0.07,<br>0.09)                   | 40.66<br>(39.70,<br>41.61)                |
|                            | <i>Intercept</i> | 4.06<br>(3.57,<br>4.55)                         | 0.28<br>(0.11,<br>0.45)                   | 5.89<br>(4.79,<br>6.98)                   | 8.69<br>(7.30,<br>10.07)                  | 20.85<br>(19.56,<br>22.14) | 5.44<br>(4.87,<br>6.01)                         | 0.16<br>(0.14,<br>0.18)   | 0.05<br>(0.02,<br>0.08)                         | 0.07<br>(0.04,<br>0.09)  | 0.10<br>(0.07,<br>0.13)                   | 0.09<br>(0.07,<br>0.11)                   | 42.16<br>(39.36,<br>44.95)                |
| <b>Birth<br/>Weight</b>    | $\beta$ /100g    | -0.03<br>(-0.09,<br>0.02)                       | -0.00<br>(-0.02,<br>0.02)                 | <b>-0.15</b><br>(-0.27,<br><b>-0.03</b> ) | -0.13<br>(-0.29,<br>0.02)                 | 0.03<br>(-0.11,<br>0.18)   | 0.03<br>(-0.03,<br>0.09)                        | 0.00<br>(-0.00,<br>0.00)  | <b>0.00</b><br>( <b>0.00</b> ,<br><b>0.01</b> ) | 0.00<br>(-0.00,<br>0.00) | 0.00<br>(-0.00,<br>0.01)                  | -0.00<br>(-0.00,<br>0.00)                 | -0.20<br>(-0.52,<br>0.11)                 |
|                            | <i>Intercept</i> | 3.59<br>(3.40,<br>3.78)                         | 0.38<br>(0.30,<br>0.45)                   | 5.19<br>(4.78,<br>5.61)                   | 8.30<br>(7.82,<br>8.78)                   | 21.64<br>(21.19,<br>22.10) | 5.55<br>(5.35,<br>5.76)                         | 0.17<br>(0.16,<br>0.17)   | 0.08<br>(0.07,<br>0.09)                         | 0.07<br>(0.06,<br>0.08)  | 0.14<br>(0.12,<br>0.15)                   | 0.10<br>(0.10,<br>0.11)                   | 42.17<br>(41.18,<br>43.16)                |
| <b>Lactation<br/>Stage</b> | $\beta$ /week    | <b>0.06</b><br>( <b>0.02</b> ,<br><b>0.10</b> ) | <b>-0.02</b><br>(-0.03,<br><b>-0.00</b> ) | <b>-0.14</b><br>(-0.23,<br><b>-0.06</b> ) | <b>-0.19</b><br>(-0.29,<br><b>-0.09</b> ) | -0.09<br>(-0.18,<br>0.00)  | <b>0.05</b><br>( <b>0.00</b> ,<br><b>0.09</b> ) | -0.00<br>(-0.00,<br>0.00) | 0.00 (-<br>0.00,<br>0.00)                       | 0.00<br>(-0.00,<br>0.00) | <b>-0.00</b><br>(-0.01,<br><b>-0.00</b> ) | <b>-0.01</b><br>(-0.01,<br><b>-0.00</b> ) | <b>-0.40</b><br>(-0.60,<br><b>-0.19</b> ) |

Supplementary Material

|               |                       |                                    |                                    |                                    |                                    |                                       |                                       |                                    |                                    |                                    |                                    |                        |                         |                                       |
|---------------|-----------------------|------------------------------------|------------------------------------|------------------------------------|------------------------------------|---------------------------------------|---------------------------------------|------------------------------------|------------------------------------|------------------------------------|------------------------------------|------------------------|-------------------------|---------------------------------------|
| <b>BMI</b>    | <b>Multiple birth</b> | <i>Singleton</i>                   | 3.90<br>(3.76, 4.04)               | 0.33<br>(0.28, 0.38)               | 5.00<br>(4.68, 5.32)               | 7.99<br>(7.60, 8.38)                  | 21.59<br>(21.25, 21.93)               | 5.72<br>(5.55, 5.88)               | 0.16<br>(0.16, 0.17)               | 0.08<br>(0.07, 0.09)               | 0.07<br>(0.07, 0.08)               | 0.12<br>(0.11, 0.13)   | 0.08<br>(0.08, 0.09)    | 41.72<br>(40.97, 42.48)               |
|               |                       | <i>Multiple</i>                    | <b>3.63</b><br><b>(3.40, 3.86)</b> | 0.24<br>(0.15, 0.33)               | <b>3.80</b><br><b>(3.27, 4.32)</b> | <b>6.59</b><br><b>(5.95, 7.23)</b>    | <b>20.60</b><br><b>(20.03, 21.16)</b> | 5.72<br>(5.45, 5.98)               | 0.16<br>(0.15, 0.17)               | <b>0.10</b><br><b>(0.08, 0.11)</b> | 0.07<br>(0.05, 0.08)               | 0.13<br>(0.11, 0.14)   | 0.07<br>(0.07, 0.08)    | <b>38.10</b><br><b>(36.86, 39.33)</b> |
|               | <i>Normal</i>         | 3.64<br>(3.47, 3.80)               | 0.24<br>(0.18, 0.30)               | 4.44<br>(4.05, 4.83)               | 7.26<br>(6.78, 7.74)               | 20.73<br>(20.32, 21.14)               | 5.70<br>(5.50, 5.90)                  | 0.17<br>(0.16, 0.17)               | 0.08<br>(0.07, 0.09)               | 0.08<br>(0.07, 0.08)               | 0.12<br>(0.10, 0.13)               | 0.08<br>(0.08, 0.09)   | 0.08<br>(0.10, 0.09)    | 39.48<br>(38.57, 40.39)               |
|               | <i>Underweight</i>    | 3.23<br>(2.79, 3.67)               | 0.43<br>(0.25, 0.62)               | 3.59<br>(2.56, 4.62)               | 6.87<br>(5.61, 8.13)               | 20.97<br>(19.89, 22.05)               | <b>6.44</b><br><b>(5.92, 6.96)</b>    | 0.18<br>(0.16, 0.20)               | 0.08<br>(0.05, 0.11)               | 0.07<br>(0.05, 0.09)               | 0.14<br>(0.11, 0.17)               | 0.08<br>(0.06, 0.09)   | 0.08<br>(0.09, 0.09)    | 39.35<br>(36.93, 41.77)               |
|               | <i>Overweight</i>     | <b>4.11</b><br><b>(3.91, 4.32)</b> | <b>0.41</b><br><b>(0.34, 0.49)</b> | <b>5.40</b><br><b>(4.91, 5.89)</b> | 8.09<br>(7.49, 8.70)               | 21.59<br>(21.07, 22.10)               | 5.46<br>(5.21, 5.71)                  | 0.16<br>(0.15, 0.17)               | 0.07<br>(0.06, 0.09)               | 0.07<br>(0.06, 0.08)               | 0.12<br>(0.10, 0.13)               | 0.08<br>(0.07, 0.08)   | 0.08<br>(0.08, 0.08)    | <b>41.99</b><br><b>(40.84, 43.14)</b> |
|               | <i>Obese</i>          | <b>4.15</b><br><b>(3.85, 4.44)</b> | 0.24<br>(0.12, 0.35)               | 4.57<br>(3.88, 5.25)               | 8.18<br>(7.34, 9.02)               | <b>22.81</b><br><b>(22.09, 23.53)</b> | 5.94<br>(5.59, 6.29)                  | 0.16<br>(0.15, 0.18)               | <b>0.12</b><br><b>(0.10, 0.14)</b> | 0.06<br>(0.05, 0.08)               | <b>0.15</b><br><b>(0.13, 0.17)</b> | 0.08<br>(0.07, 0.09)   | 0.08<br>(0.07, 0.09)    | <b>43.03</b><br><b>(41.42, 44.64)</b> |
|               | <b>Delivery</b>       | <i>Vaginal</i>                     | 3.82<br>(3.63, 4.01)               | 0.29<br>(0.22, 0.36)               | 4.97<br>(4.53, 5.41)               | 7.94<br>(7.41, 8.47)                  | 21.18<br>(20.70, 21.65)               | 5.92<br>(5.70, 6.14)               | 0.17<br>(0.16, 0.18)               | 0.08<br>(0.07, 0.09)               | 0.08<br>(0.07, 0.08)               | 0.13<br>(0.12, 0.14)   | 0.08<br>(0.08, 0.09)    | 41.45<br>(40.41, 42.49)               |
|               |                       | <i>Caesarean</i>                   | 3.83<br>(3.68, 3.98)               | 0.31<br>(0.26, 0.37)               | 4.49<br>(4.14, 4.84)               | 7.40<br>(6.98, 7.83)                  | 21.42<br>(21.04, 21.80)               | <b>5.59</b><br><b>(5.41, 5.76)</b> | 0.16<br>(0.15, 0.17)               | 0.09<br>(0.08, 0.10)               | 0.07<br>(0.06, 0.08)               | 0.12<br>(0.11, 0.13)   | 0.08<br>(0.07, 0.08)    | 40.30<br>(39.47, 41.13)               |
|               |                       | <i>Intercept</i>                   | 3.56<br>(2.76, 4.36)               | 0.10<br>(-0.20, 0.40)              | 4.44<br>(2.56, 6.32)               | 9.81<br>(7.58, 12.03)                 | 21.26<br>(19.25, 23.27)               | 6.32<br>(5.39, 7.25)               | 0.17<br>(0.13, 0.20)               | 0.05<br>(-0.01, 0.10)              | 0.06<br>(0.02, 0.10)               | 0.15<br>(0.10, 0.20)   | 0.10<br>(0.08, 0.13)    | 0.10<br>(0.08, 0.13)                  |
|               | <b>Maternal Age</b>   | $\beta/5$ years                    | 0.04<br>(-0.08, 0.16)              | 0.03<br>(-0.01, 0.08)              | 0.03<br>(-0.24, 0.31)              | <b>-0.33</b><br><b>(-0.66, 0.00)</b>  | 0.01<br>(-0.29, 0.31)                 | -0.09<br>(-0.23, 0.05)             | -0.00<br>(-0.01, 0.00)             | 0.01<br>(-0.00, 0.01)              | 0.00<br>(-0.00, 0.01)              | -0.00<br>(-0.01, 0.00) | -0.00<br>(-0.01, 0.00)  | -0.33<br>(-0.99, 0.33)                |
| <i>1</i>      |                       | 3.70<br>(3.56, 3.85)               | 0.29<br>(0.24, 0.35)               | 4.65<br>(4.30, 5.00)               | 7.34<br>(6.92, 7.76)               | 21.24<br>(20.86, 21.62)               | 5.67<br>(5.50, 5.85)                  | 0.17<br>(0.16, 0.17)               | 0.08<br>(0.07, 0.09)               | 0.07<br>(0.07, 0.08)               | 0.12<br>(0.11, 0.13)               | 0.08<br>(0.08, 0.09)   | 40.35<br>(39.51, 41.18) |                                       |
| <b>Parity</b> | <i>&gt;1</i>          | <b>4.04</b><br><b>(3.85, 4.23)</b> | 0.32<br>(0.25, 0.40)               | 4.72<br>(4.26, 5.17)               | <b>8.06</b><br><b>(7.53, 8.60)</b> | 21.46<br>(20.97, 21.94)               | 5.79<br>(5.56, 6.01)                  | <b>0.16</b><br><b>(0.15, 0.16)</b> | 0.09<br>(0.08, 0.11)               | 0.06<br>(0.05, 0.07)               | 0.13<br>(0.12, 0.14)               | 0.08<br>(0.07, 0.08)   | 41.42<br>(40.35, 42.49) |                                       |

## Supplementary Material

|                           |                                 |                                    |                      |                                    |                                      |                                       |                                    |                                    |                      |                      |                                    |                      |                                       |
|---------------------------|---------------------------------|------------------------------------|----------------------|------------------------------------|--------------------------------------|---------------------------------------|------------------------------------|------------------------------------|----------------------|----------------------|------------------------------------|----------------------|---------------------------------------|
| <b>Maternal Education</b> | <i>No post-secondary degree</i> | 3.88<br>(3.57, 4.18)               | 0.36<br>(0.24, 0.48) | 4.92<br>(4.21, 5.63)               | 7.93<br>(7.08, 8.78)                 | <b>22.36</b><br><b>(21.61, 23.11)</b> | <b>6.11</b><br><b>(5.76, 6.45)</b> | 0.17<br>(0.15, 0.18)               | 0.08<br>(0.06, 0.10) | 0.07<br>(0.05, 0.08) | 0.11<br>(0.10, 0.13)               | 0.08<br>(0.07, 0.09) | <b>42.74</b><br><b>(41.06, 44.41)</b> |
|                           | <i>Post-secondary Degree</i>    | 3.82<br>(3.69, 3.95)               | 0.30<br>(0.25, 0.34) | 4.65<br>(4.34, 4.95)               | 7.57<br>(7.20, 7.94)                 | 21.14<br>(20.81, 21.46)               | 5.64<br>(5.49, 5.79)               | 0.16<br>(0.16, 0.17)               | 0.09<br>(0.08, 0.09) | 0.07<br>(0.06, 0.08) | 0.12<br>(0.12, 0.13)               | 0.08<br>(0.08, 0.08) | 40.42<br>(39.70, 41.14)               |
|                           | <i>European</i>                 | 3.81<br>(3.61, 4.00)               | 0.31<br>(0.23, 0.38) | 4.27<br>(3.84, 4.70)               | 6.86<br>(6.37, 7.35)                 | 21.02<br>(20.54, 21.51)               | 5.77<br>(5.54, 6.00)               | 0.17<br>(0.16, 0.17)               | 0.09<br>(0.08, 0.11) | 0.07<br>(0.06, 0.08) | 0.14<br>(0.13, 0.15)               | 0.08<br>(0.07, 0.09) | 39.43<br>(38.43, 40.44)               |
|                           | <i>East or Southeast Asian</i>  | 3.74<br>(3.50, 3.98)               | 0.27<br>(0.18, 0.35) | 3.81<br>(3.29, 4.34)               | 6.15<br>(5.55, 6.75)                 | 21.04<br>(20.44, 21.64)               | 5.81<br>(5.53, 6.09)               | 0.16<br>(0.15, 0.17)               | 0.08<br>(0.06, 0.10) | 0.07<br>(0.06, 0.09) | <b>0.10</b><br><b>(0.08, 0.11)</b> | 0.07<br>(0.06, 0.08) | 38.10<br>(36.87, 39.34)               |
| <b>Maternal Ethnicity</b> | <i>South or West Asian</i>      | 4.02<br>(3.73, 4.31)               | 0.24<br>(0.14, 0.35) | <b>5.34</b><br><b>(4.71, 5.98)</b> | <b>9.17</b><br><b>(8.46, 9.89)</b>   | <b>22.39</b><br><b>(21.67, 23.11)</b> | 5.35<br>(5.01, 5.69)               | 0.16<br>(0.15, 0.17)               | 0.08<br>(0.06, 0.10) | 0.07<br>(0.06, 0.09) | 0.13<br>(0.11, 0.15)               | 0.09<br>(0.08, 0.10) | <b>43.72</b><br><b>(42.24, 45.21)</b> |
|                           | <i>African or Caribbean</i>     | 3.83<br>(3.57, 4.10)               | 0.38<br>(0.28, 0.49) | <b>5.60</b><br><b>(5.03, 6.17)</b> | <b>8.99</b><br><b>(8.35, 9.64)</b>   | 21.29<br>(20.65, 21.94)               | 5.80<br>(5.49, 6.10)               | 0.16<br>(0.15, 0.17)               | 0.08<br>(0.06, 0.09) | 0.07<br>(0.06, 0.08) | 0.12<br>(0.10, 0.14)               | 0.08<br>(0.07, 0.09) | <b>43.06</b><br><b>(41.73, 44.39)</b> |
|                           | <i>Other</i>                    | 3.78<br>(3.03, 4.53)               | 0.55<br>(0.28, 0.82) | <b>7.09</b><br><b>(5.54, 8.64)</b> | <b>10.65</b><br><b>(8.93, 12.37)</b> | 21.59<br>(19.84, 23.35)               | 5.68<br>(4.86, 6.50)               | 0.15<br>(0.12, 0.18)               | 0.12<br>(0.07, 0.16) | 0.07<br>(0.03, 0.11) | 0.13<br>(0.08, 0.17)               | 0.09<br>(0.07, 0.12) | <b>46.78</b><br><b>(43.17, 50.39)</b> |
|                           | <i>Above poverty line</i>       | 3.74<br>(3.61, 3.86)               | 0.32<br>(0.27, 0.37) | 4.52<br>(4.21, 4.82)               | 7.23<br>(6.87, 7.59)                 | 21.30<br>(20.97, 21.63)               | 5.78<br>(5.62, 5.93)               | 0.17<br>(0.16, 0.17)               | 0.09<br>(0.08, 0.09) | 0.07<br>(0.07, 0.08) | 0.12<br>(0.11, 0.13)               | 0.08<br>(0.08, 0.09) | 40.29<br>(39.56, 41.02)               |
| <b>Income</b>             | <i>Below poverty line</i>       | <b>4.26</b><br><b>(4.00, 4.52)</b> | 0.26<br>(0.16, 0.37) | <b>5.37</b><br><b>(4.74, 6.01)</b> | <b>8.93</b><br><b>(8.19, 9.67)</b>   | 21.58<br>(20.90, 22.26)               | 5.49<br>(5.18, 5.80)               | <b>0.15</b><br><b>(0.14, 0.16)</b> | 0.08<br>(0.06, 0.10) | 0.06<br>(0.05, 0.08) | 0.12<br>(0.10, 0.14)               | 0.08<br>(0.07, 0.09) | <b>42.60</b><br><b>(41.11, 44.10)</b> |
|                           | <i>Yes</i>                      | 3.79<br>(3.63, 3.96)               | 0.34<br>(0.27, 0.41) | 4.72<br>(4.33, 5.10)               | 7.61<br>(7.14, 8.08)                 | 21.22<br>(20.80, 21.63)               | 5.71<br>(5.50, 5.91)               | 0.17<br>(0.16, 0.17)               | 0.08<br>(0.07, 0.09) | 0.08<br>(0.07, 0.08) | 0.11<br>(0.10, 0.12)               | 0.08<br>(0.08, 0.09) | 40.69<br>(39.78, 41.60)               |
| <b>English</b>            | <i>Mixed</i>                    | 3.75<br>(3.55, 3.96)               | 0.26<br>(0.18, 0.35) | 4.64<br>(4.15, 5.12)               | 7.66<br>(7.07, 8.25)                 | 21.53<br>(21.00, 22.06)               | 5.81<br>(5.55, 6.07)               | 0.16<br>(0.15, 0.17)               | 0.09<br>(0.07, 0.10) | 0.07<br>(0.06, 0.08) | 0.13<br>(0.12, 0.14)               | 0.08<br>(0.07, 0.09) | 41.03<br>(39.88, 42.19)               |

Supplementary Material

|                       |                |                      |                                    |                                    |                                    |                         |                                    |                                    |                      |                      |                      |                      |                                       |
|-----------------------|----------------|----------------------|------------------------------------|------------------------------------|------------------------------------|-------------------------|------------------------------------|------------------------------------|----------------------|----------------------|----------------------|----------------------|---------------------------------------|
| <b>Marital Status</b> | <i>No</i>      | 3.68<br>(3.33, 4.03) | 0.28<br>(0.13, 0.44)               | 4.09<br>(3.24, 4.93)               | 6.69<br>(5.66, 7.72)               | 20.34<br>(19.42, 21.25) | 5.52<br>(5.06, 5.97)               | 0.16<br>(0.15, 0.18)               | 0.08<br>(0.06, 0.11) | 0.07<br>(0.05, 0.09) | 0.13<br>(0.11, 0.16) | 0.08<br>(0.06, 0.09) | <b>37.96</b><br><b>(35.95, 39.97)</b> |
|                       | <i>Single</i>  | 3.84<br>(3.33, 4.36) | 0.28<br>(0.08, 0.47)               | 6.47<br>(5.30, 7.64)               | 9.78<br>(8.38, 11.17)              | 21.61<br>(20.31, 22.92) | 4.86<br>(4.24, 5.48)               | 0.15<br>(0.13, 0.17)               | 0.06<br>(0.03, 0.10) | 0.07<br>(0.04, 0.10) | 0.12<br>(0.09, 0.16) | 0.09<br>(0.07, 0.11) | 44.13<br>(41.30, 46.95)               |
|                       | <i>Married</i> | 3.76<br>(3.64, 3.89) | 0.31<br>(0.26, 0.36)               | <b>4.51</b><br><b>(4.22, 4.80)</b> | <b>7.38</b><br><b>(7.04, 7.73)</b> | 21.20<br>(20.89, 21.52) | <b>5.77</b><br><b>(5.62, 5.92)</b> | 0.17<br>(0.16, 0.17)               | 0.08<br>(0.07, 0.09) | 0.07<br>(0.07, 0.08) | 0.12<br>(0.11, 0.13) | 0.08<br>(0.08, 0.08) | <b>40.29</b><br><b>(39.60, 40.97)</b> |
| <b>Smoking</b>        | <i>No</i>      | 3.81<br>(3.69, 3.93) | 0.28<br>(0.24, 0.33)               | 4.60<br>(4.32, 4.88)               | 7.55<br>(7.21, 7.89)               | 21.27<br>(20.96, 21.57) | 5.70<br>(5.55, 5.84)               | 0.16<br>(0.16, 0.17)               | 0.08<br>(0.08, 0.09) | 0.07<br>(0.06, 0.08) | 0.12<br>(0.12, 0.13) | 0.08<br>(0.08, 0.08) | 40.51<br>(39.85, 41.18)               |
|                       | <i>Yes</i>     | 4.24<br>(3.70, 4.79) | <b>0.79</b><br><b>(0.58, 1.00)</b> | <b>6.17</b><br><b>(4.92, 7.41)</b> | 8.90<br>(7.41, 10.38)              | 22.42<br>(21.07, 23.77) | 6.12<br>(5.49, 6.75)               | 0.16<br>(0.14, 0.18)               | 0.11<br>(0.08, 0.15) | 0.06<br>(0.03, 0.09) | 0.11<br>(0.07, 0.14) | 0.09<br>(0.07, 0.10) | <b>45.39</b><br><b>(42.45, 48.34)</b> |
|                       | <i>Spring</i>  | 3.94<br>(3.72, 4.17) | 0.32<br>(0.24, 0.39)               | 5.08<br>(4.57, 5.59)               | 7.24<br>(6.61, 7.87)               | 20.98<br>(20.43, 21.54) | 5.48<br>(5.22, 5.74)               | 0.16<br>(0.15, 0.16)               | 0.09<br>(0.07, 0.10) | 0.07<br>(0.06, 0.08) | 0.13<br>(0.11, 0.14) | 0.08<br>(0.07, 0.09) | 40.27<br>(39.02, 41.51)               |
| <b>Season</b>         | <i>Fall</i>    | 3.61<br>(3.35, 3.86) | <b>0.14</b><br><b>(0.04, 0.24)</b> | <b>3.77</b><br><b>(3.19, 4.36)</b> | 7.53<br>(6.81, 8.26)               | 21.31<br>(20.67, 21.95) | <b>6.19</b><br><b>(5.89, 6.49)</b> | <b>0.18</b><br><b>(0.17, 0.19)</b> | 0.08<br>(0.06, 0.10) | 0.09<br>(0.07, 0.10) | 0.11<br>(0.10, 0.13) | 0.08<br>(0.08, 0.09) | 40.04<br>(38.61, 41.47)               |
|                       | <i>Summer</i>  | 3.94<br>(3.68, 4.20) | 0.41<br>(0.32, 0.50)               | 4.86<br>(4.28, 5.45)               | 7.73<br>(7.01, 8.45)               | 21.68<br>(21.04, 22.32) | 5.70<br>(5.40, 6.00)               | 0.16<br>(0.15, 0.17)               | 0.09<br>(0.08, 0.11) | 0.06<br>(0.04, 0.07) | 0.13<br>(0.12, 0.15) | 0.08<br>(0.07, 0.08) | 41.48<br>(40.05, 42.91)               |
|                       | <i>Winter</i>  | 3.80<br>(3.58, 4.02) | 0.31<br>(0.23, 0.39)               | 4.81<br>(4.31, 5.32)               | 7.97<br>(7.34, 8.59)               | 21.40<br>(20.84, 21.95) | 5.61<br>(5.35, 5.87)               | 0.17<br>(0.16, 0.17)               | 0.08<br>(0.07, 0.10) | 0.07<br>(0.06, 0.08) | 0.12<br>(0.10, 0.13) | 0.08<br>(0.07, 0.09) | 41.21<br>(39.98, 42.45)               |

## Supplementary Material

|                        |                          | Monounsaturated Fats - mol% (95% CI) |                          |                          |                             |                             |                             |                             |                             | Total MUFA                  |
|------------------------|--------------------------|--------------------------------------|--------------------------|--------------------------|-----------------------------|-----------------------------|-----------------------------|-----------------------------|-----------------------------|-----------------------------|
|                        |                          | 14:1n-5                              | 16:1n-7                  | 17:1n-7                  | 18:1n-7                     | 18:1n-9                     | 20:1n-9                     | 22:1n-9                     | 24:1n-9                     |                             |
| <b>Gestational</b>     | <i>Intercept</i>         | 0.21 (0.09, 0.34)                    | 2.02 (1.25, 2.79)        | 0.19 (0.14, 0.25)        | 1.28 (0.88, 1.67)           | 26.83 (21.49, 32.17)        | 0.36 (0.21, 0.51)           | 0.05 (0.01, 0.09)           | 0.06 (-0.01, 0.12)          | 31.69 (25.67, 37.70)        |
|                        | <b>Age</b> $\beta$ /week | -0.00 (-0.01, 0.00)                  | 0.01 (-0.02, 0.04)       | -0.00 (-0.00, 0.00)      | <b>0.02 (0.01, 0.04)</b>    | <b>0.28 (0.08, 0.47)</b>    | <b>0.01 (0.00, 0.01)</b>    | <b>0.00 (0.00, 0.00)</b>    | 0.00 (-0.00, 0.00)          | <b>0.32 (0.10, 0.54)</b>    |
| <b>Infant Sex</b>      | <i>Female</i>            | 0.18 (0.17, 0.20)                    | 2.28 (2.19, 2.36)        | 0.17 (0.16, 0.17)        | 1.96 (1.92, 2.01)           | 34.68 (34.06, 35.30)        | 0.54 (0.53, 0.56)           | 0.09 (0.09, 0.10)           | 0.09 (0.08, 0.09)           | 40.68 (39.99, 41.37)        |
|                        | <i>Male</i>              | 0.16 (0.15, 0.18)                    | <b>2.10 (2.00, 2.19)</b> | 0.17 (0.16, 0.17)        | 1.91 (1.86, 1.96)           | 34.57 (33.86, 35.27)        | 0.55 (0.53, 0.57)           | 0.10 (0.09, 0.10)           | 0.09 (0.08, 0.10)           | 40.50 (39.71, 41.29)        |
| <b>Birth Weight</b>    | <i>Intercept</i>         | 0.13 (0.08, 0.17)                    | 2.16 (1.88, 2.44)        | 0.17 (0.14, 0.19)        | 1.95 (1.80, 2.10)           | 32.24 (30.21, 34.27)        | 0.57 (0.51, 0.62)           | 0.10 (0.09, 0.12)           | 0.11 (0.09, 0.13)           | 38.16 (35.90, 40.43)        |
|                        | $\beta$ /100g            | <b>0.01 (0.00, 0.01)</b>             | 0.00 (-0.03, 0.04)       | -0.00 (-0.00, 0.00)      | -0.00 (-0.02, 0.02)         | <b>0.27 (0.05, 0.50)</b>    | -0.00 (-0.01, 0.00)         | -0.00 (-0.00, 0.00)         | -0.00 (-0.01, 0.00)         | <b>0.28 (0.03, 0.53)</b>    |
| <b>Lactation Stage</b> | <i>Intercept</i>         | 0.17 (0.15, 0.18)                    | 2.16 (2.05, 2.26)        | 0.17 (0.16, 0.17)        | 1.99 (1.94, 2.05)           | 33.51 (32.75, 34.26)        | 0.60 (0.58, 0.63)           | 0.12 (0.12, 0.13)           | 0.13 (0.12, 0.14)           | 39.75 (38.88, 40.61)        |
|                        | $\beta$ /week            | 0.00 (-0.00, 0.01)                   | 0.02 (-0.00, 0.04)       | 0.00 (-0.00, 0.00)       | <b>-0.01 (-0.03, -0.00)</b> | <b>0.26 (0.10, 0.42)</b>    | <b>-0.02 (-0.02, -0.01)</b> | <b>-0.01 (-0.01, -0.01)</b> | <b>-0.01 (-0.01, -0.01)</b> | <b>0.20 (0.02, 0.38)</b>    |
| <b>Multiple birth</b>  | <i>Singleton</i>         | 0.18 (0.16, 0.19)                    | 2.24 (2.16, 2.33)        | 0.17 (0.16, 0.18)        | 1.93 (1.88, 1.97)           | 33.61 (33.06, 34.15)        | 0.55 (0.53, 0.56)           | 0.10 (0.09, 0.10)           | 0.09 (0.09, 0.10)           | 39.64 (39.01, 40.26)        |
|                        | <i>Multiple</i>          | 0.17 (0.15, 0.20)                    | 2.19 (2.05, 2.32)        | 0.17 (0.16, 0.18)        | 1.99 (1.91, 2.06)           | <b>36.69 (35.79, 37.60)</b> | 0.55 (0.53, 0.58)           | 0.09 (0.09, 0.10)           | 0.08 (0.07, 0.09)           | <b>42.70 (41.67, 43.73)</b> |
| <b>BMI</b>             | <i>Underweight</i>       | 0.17 (0.13, 0.21)                    | 2.48 (2.22, 2.74)        | 0.18 (0.16, 0.20)        | 2.05 (1.91, 2.20)           | 36.33 (34.53, 38.13)        | 0.55 (0.50, 0.60)           | 0.09 (0.08, 0.11)           | 0.09 (0.07, 0.11)           | 42.60 (40.58, 44.61)        |
|                        | <i>Normal</i>            | 0.17 (0.15, 0.18)                    | 2.17 (2.07, 2.26)        | 0.17 (0.16, 0.17)        | 1.95 (1.89, 2.00)           | 35.21 (34.53, 35.88)        | 0.57 (0.55, 0.59)           | 0.10 (0.09, 0.10)           | 0.09 (0.08, 0.10)           | 41.33 (40.58, 42.09)        |
|                        | <i>Overweight</i>        | 0.16 (0.14, 0.18)                    | 2.13 (2.01, 2.26)        | 0.16 (0.15, 0.17)        | 1.89 (1.82, 1.96)           | <b>32.88 (32.03, 33.73)</b> | <b>0.52 (0.49, 0.54)</b>    | 0.09 (0.08, 0.10)           | 0.08 (0.07, 0.09)           | <b>38.43 (37.48, 39.38)</b> |
|                        | <i>Obese</i>             | <b>0.24 (0.21, 0.26)</b>             | <b>2.44 (2.26, 2.61)</b> | <b>0.19 (0.17, 0.20)</b> | 1.95 (1.85, 2.04)           | 34.08 (32.89, 35.27)        | 0.55 (0.51, 0.58)           | 0.10 (0.09, 0.11)           | 0.10 (0.08, 0.11)           | 40.59 (39.25, 41.92)        |
| <b>Delivery</b>        | <i>Vaginal</i>           | 0.18 (0.17, 0.20)                    | 2.20 (2.09, 2.31)        | 0.17 (0.17, 0.18)        | 1.88 (1.82, 1.94)           | 34.07 (33.28, 34.86)        | 0.53 (0.51, 0.56)           | 0.09 (0.09, 0.10)           | 0.09 (0.08, 0.10)           | 40.09 (39.20, 40.98)        |

Supplementary Material

|                           |                                 |                          |                          |                          |                          |                             |                          |                     |                     |                             |
|---------------------------|---------------------------------|--------------------------|--------------------------|--------------------------|--------------------------|-----------------------------|--------------------------|---------------------|---------------------|-----------------------------|
| <b>Maternal Age</b>       | <i>Caesarean</i>                | 0.17 (0.16, 0.18)        | 2.25 (2.16, 2.34)        | 0.17 (0.16, 0.17)        | <b>1.98 (1.93, 2.03)</b> | 34.66 (34.03, 35.30)        | 0.56 (0.54, 0.57)        | 0.10 (0.09, 0.10)   | 0.09 (0.08, 0.10)   | 40.70 (39.98, 41.41)        |
|                           | <i>Intercept</i>                | 0.16 (0.08, 0.24)        | 2.32 (1.84, 2.80)        | 0.13 (0.09, 0.16)        | 1.98 (1.72, 2.24)        | 32.22 (28.90, 35.54)        | 0.57 (0.47, 0.66)        | 0.11 (0.08, 0.13)   | 0.11 (0.07, 0.16)   | 38.14 (34.41, 41.86)        |
|                           | $\beta/5$ years                 | 0.00 (-0.01, 0.01)       | -0.01 (-0.08, 0.06)      | <b>0.01 (0.00, 0.01)</b> | -0.01 (-0.04, 0.03)      | 0.33 (-0.16, 0.83)          | -0.00 (-0.02, 0.01)      | -0.00 (-0.01, 0.00) | -0.00 (-0.01, 0.00) | 0.35 (-0.20, 0.90)          |
| <b>Parity</b>             | <i>1</i>                        | 0.18 (0.16, 0.19)        | 2.23 (2.14, 2.31)        | 0.17 (0.16, 0.18)        | 1.96 (1.91, 2.01)        | 35.04 (34.43, 35.66)        | 0.56 (0.55, 0.58)        | 0.10 (0.09, 0.10)   | 0.09 (0.08, 0.10)   | 41.03 (40.34, 41.73)        |
|                           | <i>&gt;1</i>                    | 0.17 (0.15, 0.19)        | 2.23 (2.12, 2.35)        | 0.17 (0.16, 0.18)        | 1.92 (1.85, 1.98)        | <b>33.43 (32.64, 34.21)</b> | <b>0.52 (0.50, 0.54)</b> | 0.09 (0.08, 0.10)   | 0.09 (0.08, 0.10)   | <b>39.51 (38.62, 40.41)</b> |
| <b>Maternal Education</b> | <i>No post-secondary degree</i> | 0.16 (0.14, 0.19)        | 2.32 (2.14, 2.49)        | 0.16 (0.15, 0.18)        | 1.95 (1.85, 2.05)        | <b>33.22 (31.96, 34.48)</b> | 0.52 (0.49, 0.56)        | 0.10 (0.09, 0.11)   | 0.09 (0.07, 0.10)   | 39.55 (38.13, 40.96)        |
|                           | <i>Post-secondary Degree</i>    | 0.18 (0.17, 0.19)        | 2.20 (2.13, 2.28)        | 0.17 (0.16, 0.18)        | 1.94 (1.89, 1.98)        | 34.61 (34.07, 35.15)        | 0.55 (0.54, 0.57)        | 0.10 (0.09, 0.10)   | 0.09 (0.08, 0.10)   | 40.57 (39.96, 41.17)        |
| <b>Maternal Ethnicity</b> | <i>European</i>                 | 0.22 (0.20, 0.23)        | 2.34 (2.23, 2.44)        | 0.18 (0.17, 0.19)        | 1.92 (1.87, 1.97)        | 36.15 (35.42, 36.89)        | 0.55 (0.52, 0.57)        | 0.09 (0.09, 0.10)   | 0.08 (0.07, 0.09)   | 42.42 (41.61, 43.22)        |
|                           | <i>East or Southeast Asian</i>  | <b>0.13 (0.12, 0.15)</b> | 2.38 (2.25, 2.51)        | 0.17 (0.16, 0.18)        | <b>2.14 (2.08, 2.21)</b> | 35.42 (34.52, 36.32)        | 0.59 (0.56, 0.61)        | 0.10 (0.09, 0.11)   | 0.09 (0.08, 0.10)   | 41.79 (40.80, 42.78)        |
|                           | <i>South or West Asian</i>      | 0.20 (0.18, 0.22)        | <b>2.07 (1.91, 2.22)</b> | <b>0.16 (0.15, 0.17)</b> | <b>1.74 (1.66, 1.82)</b> | <b>32.09 (31.00, 33.18)</b> | 0.52 (0.48, 0.55)        | 0.10 (0.09, 0.11)   | 0.09 (0.08, 0.11)   | <b>37.44 (36.24, 38.64)</b> |
|                           | <i>African or Caribbean</i>     | <b>0.13 (0.11, 0.15)</b> | <b>1.92 (1.78, 2.06)</b> | <b>0.15 (0.14, 0.16)</b> | 1.86 (1.79, 1.93)        | <b>32.43 (31.45, 33.41)</b> | 0.54 (0.51, 0.57)        | 0.10 (0.09, 0.11)   | 0.09 (0.08, 0.11)   | <b>38.08 (37.00, 39.16)</b> |
| <b>Income</b>             | <i>Other</i>                    | 0.23 (0.18, 0.29)        | 2.30 (1.92, 2.68)        | 0.16 (0.13, 0.19)        | 1.99 (1.79, 2.18)        | <b>31.04 (28.35, 33.73)</b> | 0.51 (0.43, 0.60)        | 0.11 (0.08, 0.13)   | 0.11 (0.07, 0.15)   | <b>37.39 (34.38, 40.39)</b> |
|                           | <i>Above poverty line</i>       | 0.18 (0.17, 0.20)        | 2.25 (2.17, 2.33)        | 0.17 (0.17, 0.18)        | 1.96 (1.91, 2.00)        | 34.99 (34.47, 35.51)        | 0.56 (0.54, 0.58)        | 0.10 (0.09, 0.10)   | 0.09 (0.08, 0.10)   | 41.15 (40.57, 41.73)        |
|                           | <i>Below poverty line</i>       | <b>0.15 (0.12, 0.17)</b> | 2.11 (1.95, 2.27)        | <b>0.15 (0.14, 0.16)</b> | 1.87 (1.78, 1.96)        | <b>32.27 (31.20, 33.34)</b> | <b>0.50 (0.47, 0.53)</b> | 0.09 (0.08, 0.10)   | 0.08 (0.07, 0.10)   | <b>37.70 (36.50, 38.89)</b> |

Supplementary Material

|                       |                |                          |                   |                          |                          |                             |                   |                   |                   |                             |
|-----------------------|----------------|--------------------------|-------------------|--------------------------|--------------------------|-----------------------------|-------------------|-------------------|-------------------|-----------------------------|
| <b>English</b>        | <i>Yes</i>     | 0.17 (0.16, 0.19)        | 2.23 (2.13, 2.33) | 0.17 (0.16, 0.18)        | 1.95 (1.90, 2.00)        | 34.53 (33.86, 35.20)        | 0.56 (0.54, 0.58) | 0.10 (0.09, 0.10) | 0.09 (0.08, 0.10) | 40.63 (39.87, 41.40)        |
|                       | <i>Mixed</i>   | 0.19 (0.17, 0.21)        | 2.29 (2.16, 2.42) | 0.18 (0.17, 0.19)        | 1.92 (1.85, 1.99)        | 34.50 (33.66, 35.35)        | 0.53 (0.51, 0.56) | 0.09 (0.09, 0.10) | 0.09 (0.08, 0.10) | 40.49 (39.53, 41.45)        |
|                       | <i>No</i>      | <b>0.13 (0.10, 0.16)</b> | 2.00 (1.78, 2.22) | <b>0.15 (0.13, 0.17)</b> | 2.01 (1.89, 2.12)        | 36.06 (34.59, 37.53)        | 0.57 (0.53, 0.62) | 0.10 (0.08, 0.11) | 0.08 (0.07, 0.10) | 41.78 (40.10, 43.45)        |
| <b>Marital Status</b> | <i>Single</i>  | 0.17 (0.12, 0.21)        | 2.07 (1.75, 2.38) | 0.14 (0.12, 0.16)        | 1.76 (1.60, 1.92)        | 31.96 (29.89, 34.03)        | 0.51 (0.45, 0.57) | 0.10 (0.08, 0.12) | 0.11 (0.08, 0.13) | 37.46 (35.12, 39.80)        |
|                       | <i>Married</i> | 0.17 (0.16, 0.18)        | 2.24 (2.16, 2.31) | <b>0.17 (0.17, 0.18)</b> | <b>1.96 (1.92, 2.00)</b> | <b>34.86 (34.35, 35.36)</b> | 0.55 (0.54, 0.57) | 0.10 (0.09, 0.10) | 0.09 (0.08, 0.10) | <b>40.91 (40.34, 41.48)</b> |
| <b>Smoking</b>        | <i>No</i>      | 0.17 (0.16, 0.18)        | 2.22 (2.15, 2.30) | 0.17 (0.16, 0.17)        | 1.94 (1.90, 1.98)        | 34.53 (34.03, 35.03)        | 0.55 (0.53, 0.56) | 0.10 (0.09, 0.10) | 0.09 (0.08, 0.10) | 40.54 (39.97, 41.10)        |
|                       | <i>Yes</i>     | 0.22 (0.17, 0.26)        | 2.31 (2.00, 2.63) | 0.18 (0.15, 0.20)        | 1.92 (1.75, 2.09)        | 32.48 (30.23, 34.73)        | 0.52 (0.46, 0.59) | 0.10 (0.08, 0.12) | 0.10 (0.07, 0.12) | 38.95 (36.40, 41.50)        |
|                       | <i>Spring</i>  | 0.18 (0.16, 0.20)        | 2.24 (2.11, 2.37) | 0.17 (0.16, 0.18)        | 1.97 (1.90, 2.03)        | 34.72 (33.78, 35.65)        | 0.55 (0.53, 0.58) | 0.10 (0.09, 0.11) | 0.09 (0.08, 0.10) | 40.92 (39.88, 41.97)        |
| <b>Season</b>         | <i>Fall</i>    | <b>0.14 (0.12, 0.17)</b> | 2.17 (2.03, 2.32) | 0.17 (0.15, 0.18)        | 2.00 (1.92, 2.08)        | 34.78 (33.71, 35.85)        | 0.59 (0.56, 0.62) | 0.10 (0.09, 0.11) | 0.10 (0.09, 0.11) | 40.99 (39.79, 42.18)        |
|                       | <i>Summer</i>  | 0.20 (0.18, 0.22)        | 2.39 (2.25, 2.54) | 0.18 (0.17, 0.19)        | 1.97 (1.89, 2.05)        | 34.43 (33.35, 35.50)        | 0.53 (0.50, 0.56) | 0.09 (0.08, 0.10) | 0.08 (0.07, 0.10) | 40.43 (39.23, 41.63)        |
|                       | <i>Winter</i>  | 0.18 (0.16, 0.20)        | 2.14 (2.01, 2.26) | 0.16 (0.15, 0.17)        | <b>1.85 (1.79, 1.92)</b> | 33.89 (32.97, 34.82)        | 0.53 (0.50, 0.55) | 0.09 (0.08, 0.10) | 0.08 (0.07, 0.09) | 39.64 (38.61, 40.67)        |

## Supplementary Material

|                           |                                 | n-3 PUFA - mol% (95% CI) |                             |                          |                             |                             |                          |
|---------------------------|---------------------------------|--------------------------|-----------------------------|--------------------------|-----------------------------|-----------------------------|--------------------------|
|                           |                                 | 18:3n-3 (ALA)            | 20:3n-3                     | 20:5n-3 (EPA)            | 22:5n-3 (DPA)               | 22:6n-3 (DHA)               | Total n-3 PUFA           |
| <b>Gestational Age</b>    | <i>Intercept</i>                | 1.86 (1.18, 2.55)        | 0.08 (0.04, 0.13)           | 0.07 (-0.02, 0.16)       | 0.13 (0.05, 0.22)           | 0.02 (-0.20, 0.25)          | 2.15 (1.35, 2.94)        |
|                           | $\beta$ /week                   | -0.01 (-0.03, 0.02)      | 0.00 (-0.00, 0.00)          | 0.00 (-0.00, 0.00)       | 0.00 (-0.00, 0.01)          | <b>0.01 (0.00, 0.02)</b>    | 0.01 (-0.02, 0.04)       |
| <b>Infant Sex</b>         | <i>Female</i>                   | 1.73 (1.65, 1.80)        | 0.09 (0.09, 0.10)           | 0.09 (0.08, 0.10)        | 0.19 (0.18, 0.20)           | 0.36 (0.33, 0.39)           | 2.45 (2.36, 2.54)        |
|                           | <i>Male</i>                     | 1.76 (1.67, 1.85)        | 0.10 (0.09, 0.10)           | 0.09 (0.08, 0.10)        | 0.19 (0.18, 0.20)           | 0.35 (0.32, 0.39)           | 2.43 (2.33, 2.54)        |
| <b>Birth Weight</b>       | <i>Intercept</i>                | 1.72 (1.46, 1.98)        | 0.11 (0.10, 0.13)           | 0.04 (0.01, 0.07)        | 0.18 (0.15, 0.21)           | 0.22 (0.13, 0.32)           | 2.22 (1.92, 2.52)        |
|                           | $\beta$ /100g                   | 0.00 (-0.03, 0.03)       | <b>-0.00 (-0.00, -0.00)</b> | <b>0.01 (0.00, 0.01)</b> | 0.00 (-0.00, 0.00)          | <b>0.02 (0.00, 0.03)</b>    | 0.03 (-0.01, 0.06)       |
| <b>Lactation Stage</b>    | <i>Intercept</i>                | 1.58 (1.48, 1.68)        | 0.12 (0.11, 0.12)           | 0.08 (0.07, 0.10)        | 0.20 (0.19, 0.22)           | 0.41 (0.38, 0.44)           | 2.34 (2.22, 2.45)        |
|                           | $\beta$ /week                   | <b>0.04 (0.02, 0.06)</b> | <b>-0.01 (-0.01, -0.00)</b> | 0.00 (-0.00, 0.00)       | <b>-0.00 (-0.01, -0.00)</b> | <b>-0.02 (-0.02, -0.01)</b> | 0.02 (-0.01, 0.04)       |
| <b>Multiple birth</b>     | <i>Singleton</i>                | 1.68 (1.61, 1.76)        | 0.10 (0.09, 0.10)           | 0.08 (0.07, 0.09)        | 0.19 (0.18, 0.20)           | 0.35 (0.33, 0.38)           | 2.37 (2.28, 2.45)        |
|                           | <i>Multiple</i>                 | 1.80 (1.68, 1.92)        | 0.09 (0.08, 0.10)           | 0.10 (0.08, 0.12)        | 0.19 (0.18, 0.21)           | 0.35 (0.31, 0.40)           | 2.52 (2.38, 2.66)        |
| <b>BMI</b>                | <i>Underweight</i>              | 1.62 (1.38, 1.86)        | 0.09 (0.07, 0.10)           | 0.08 (0.05, 0.11)        | 0.19 (0.16, 0.22)           | 0.34 (0.26, 0.42)           | 2.23 (1.95, 2.51)        |
|                           | <i>Normal</i>                   | 1.76 (1.67, 1.84)        | 0.10 (0.09, 0.10)           | 0.09 (0.08, 0.10)        | 0.19 (0.18, 0.20)           | 0.38 (0.35, 0.41)           | 2.48 (2.37, 2.58)        |
|                           | <i>Overweight</i>               | 1.78 (1.66, 1.89)        | 0.10 (0.09, 0.10)           | 0.09 (0.07, 0.10)        | 0.19 (0.18, 0.21)           | 0.35 (0.32, 0.39)           | 2.48 (2.35, 2.61)        |
|                           | <i>Obese</i>                    | 1.54 (1.38, 1.70)        | 0.09 (0.08, 0.10)           | 0.07 (0.05, 0.10)        | 0.18 (0.16, 0.20)           | <b>0.28 (0.22, 0.33)</b>    | <b>2.16 (1.98, 2.35)</b> |
| <b>Delivery</b>           | <i>Vaginal</i>                  | 1.70 (1.60, 1.80)        | 0.09 (0.09, 0.10)           | 0.09 (0.08, 0.11)        | 0.19 (0.18, 0.20)           | 0.35 (0.31, 0.38)           | 2.37 (2.26, 2.49)        |
|                           | <i>Caesarean</i>                | 1.73 (1.65, 1.81)        | 0.10 (0.09, 0.10)           | 0.08 (0.07, 0.09)        | 0.19 (0.18, 0.20)           | 0.36 (0.33, 0.39)           | 2.43 (2.34, 2.52)        |
| <b>Maternal Age</b>       | <i>Intercept</i>                | 1.63 (1.21, 2.06)        | 0.12 (0.10, 0.15)           | 0.08 (0.02, 0.14)        | 0.18 (0.13, 0.23)           | 0.23 (0.09, 0.37)           | 2.28 (1.79, 2.77)        |
|                           | $\beta$ /5 years                | 0.01 (-0.05, 0.07)       | <b>-0.00 (-0.01, -0.00)</b> | 0.00 (-0.01, 0.01)       | 0.00 (-0.01, 0.01)          | 0.02 (-0.00, 0.04)          | 0.02 (-0.05, 0.09)       |
| <b>Parity</b>             | <i>1</i>                        | 1.69 (1.61, 1.76)        | 0.09 (0.09, 0.10)           | 0.09 (0.08, 0.10)        | 0.19 (0.18, 0.20)           | 0.37 (0.34, 0.39)           | 2.40 (2.30, 2.49)        |
|                           | <i>&gt;1</i>                    | 1.77 (1.66, 1.87)        | 0.10 (0.09, 0.10)           | 0.08 (0.07, 0.09)        | 0.19 (0.18, 0.20)           | 0.33 (0.30, 0.37)           | 2.43 (2.31, 2.55)        |
| <b>Maternal Education</b> | <i>No post-secondary degree</i> | <b>1.52 (1.37, 1.68)</b> | 0.09 (0.08, 0.10)           | 0.08 (0.06, 0.10)        | 0.19 (0.17, 0.21)           | 0.38 (0.33, 0.44)           | 2.26 (2.07, 2.44)        |



## Supplementary Material

|                           |                                |                          |                          |                   |                   |                          |                          |
|---------------------------|--------------------------------|--------------------------|--------------------------|-------------------|-------------------|--------------------------|--------------------------|
|                           | <i>Post-secondary Degree</i>   | 1.76 (1.69, 1.82)        | 0.10 (0.09, 0.10)        | 0.09 (0.08, 0.10) | 0.19 (0.18, 0.20) | 0.35 (0.33, 0.37)        | 2.44 (2.36, 2.52)        |
|                           | <i>European</i>                | 1.70 (1.59, 1.80)        | 0.09 (0.08, 0.09)        | 0.10 (0.08, 0.11) | 0.18 (0.17, 0.20) | 0.32 (0.29, 0.35)        | 2.36 (2.24, 2.48)        |
|                           | <i>East or Southeast Asian</i> | 1.77 (1.64, 1.89)        | <b>0.10 (0.09, 0.11)</b> | 0.08 (0.06, 0.09) | 0.20 (0.18, 0.21) | <b>0.40 (0.35, 0.44)</b> | 2.47 (2.32, 2.62)        |
| <b>Maternal Ethnicity</b> | <i>South or West Asian</i>     | 1.78 (1.63, 1.93)        | <b>0.10 (0.09, 0.11)</b> | 0.09 (0.07, 0.11) | 0.19 (0.18, 0.21) | 0.33 (0.28, 0.38)        | 2.49 (2.31, 2.66)        |
|                           | <i>African or Caribbean</i>    | 1.69 (1.55, 1.83)        | <b>0.10 (0.09, 0.11)</b> | 0.09 (0.07, 0.10) | 0.19 (0.17, 0.21) | <b>0.39 (0.34, 0.44)</b> | 2.43 (2.27, 2.59)        |
|                           | <i>Other</i>                   | 1.46 (1.08, 1.85)        | 0.11 (0.09, 0.13)        | 0.09 (0.04, 0.13) | 0.24 (0.19, 0.28) | 0.35 (0.22, 0.47)        | 2.05 (1.60, 2.50)        |
|                           | <i>Above poverty line</i>      | 1.70 (1.63, 1.77)        | 0.09 (0.09, 0.10)        | 0.09 (0.08, 0.10) | 0.19 (0.18, 0.20) | 0.36 (0.33, 0.38)        | 2.39 (2.31, 2.48)        |
| <b>Income</b>             | <i>Below poverty line</i>      | 1.76 (1.62, 1.90)        | 0.10 (0.09, 0.11)        | 0.08 (0.06, 0.09) | 0.19 (0.17, 0.21) | 0.34 (0.29, 0.39)        | 2.44 (2.27, 2.61)        |
|                           | <i>Yes</i>                     | 1.67 (1.58, 1.76)        | 0.10 (0.09, 0.10)        | 0.08 (0.07, 0.09) | 0.18 (0.17, 0.20) | 0.34 (0.30, 0.37)        | 2.36 (2.25, 2.46)        |
| <b>English</b>            | <i>Mixed</i>                   | 1.66 (1.55, 1.78)        | 0.09 (0.09, 0.10)        | 0.09 (0.08, 0.11) | 0.20 (0.18, 0.21) | <b>0.39 (0.35, 0.43)</b> | 2.40 (2.27, 2.53)        |
|                           | <i>No</i>                      | <b>1.91 (1.71, 2.10)</b> | 0.10 (0.09, 0.11)        | 0.10 (0.07, 0.13) | 0.20 (0.18, 0.22) | 0.40 (0.34, 0.47)        | 2.55 (2.32, 2.78)        |
| <b>Marital Status</b>     | <i>Single</i>                  | 1.56 (1.28, 1.84)        | 0.09 (0.07, 0.11)        | 0.09 (0.06, 0.13) | 0.21 (0.17, 0.24) | 0.42 (0.33, 0.52)        | 2.27 (1.93, 2.60)        |
|                           | <i>Married</i>                 | 1.70 (1.64, 1.77)        | 0.10 (0.09, 0.10)        | 0.09 (0.08, 0.10) | 0.19 (0.18, 0.20) | 0.36 (0.33, 0.38)        | 2.40 (2.32, 2.48)        |
| <b>Smoking</b>            | <i>No</i>                      | 1.73 (1.67, 1.79)        | 0.10 (0.09, 0.10)        | 0.09 (0.08, 0.10) | 0.19 (0.18, 0.20) | 0.36 (0.33, 0.38)        | 2.42 (2.35, 2.50)        |
|                           | <i>Yes</i>                     | <b>1.42 (1.13, 1.71)</b> | 0.10 (0.08, 0.11)        | 0.07 (0.03, 0.10) | 0.19 (0.15, 0.22) | 0.31 (0.22, 0.41)        | <b>2.08 (1.74, 2.41)</b> |
|                           | <i>Spring</i>                  | 1.74 (1.63, 1.86)        | 0.10 (0.09, 0.11)        | 0.08 (0.07, 0.10) | 0.19 (0.17, 0.20) | 0.34 (0.30, 0.38)        | 2.40 (2.27, 2.54)        |
|                           | <i>Fall</i>                    | 1.63 (1.50, 1.76)        | 0.10 (0.09, 0.11)        | 0.08 (0.06, 0.10) | 0.17 (0.16, 0.19) | 0.35 (0.31, 0.40)        | 2.32 (2.17, 2.48)        |
| <b>Season</b>             | <i>Summer</i>                  | 1.66 (1.53, 1.80)        | 0.09 (0.08, 0.10)        | 0.09 (0.07, 0.11) | 0.20 (0.19, 0.22) | 0.36 (0.31, 0.41)        | 2.38 (2.22, 2.54)        |
|                           | <i>Winter</i>                  | 1.79 (1.68, 1.91)        | 0.09 (0.09, 0.10)        | 0.10 (0.08, 0.11) | 0.19 (0.18, 0.21) | 0.36 (0.33, 0.40)        | 2.50 (2.37, 2.63)        |

Supplementary Material

|                        |                  | n-6 PUFA - mol% (95% CI) |                     |               |                   |                     |                     | Ratios (95% CI)     |                   |                       |                     |
|------------------------|------------------|--------------------------|---------------------|---------------|-------------------|---------------------|---------------------|---------------------|-------------------|-----------------------|---------------------|
|                        |                  | 18:2n-6<br>(LA)          | 18:3n-6<br>(GLA)    | 20:2n-6       | 20:3n-6<br>(DGLA) | 20:4n-6<br>(ARA)    | 22:4n-6             | 22:5n-6             | Total n-6<br>PUFA | n-6:n-3<br>PUFA       | ARA:DHA             |
| <b>Gestational Age</b> | <i>Intercept</i> | 16.26                    | 0.06                | 0.35          | 0.29              | 0.22                | -0.00               | 0.02                | 17.41             | 8.87                  | 2.22 (1.18, 3.27)   |
|                        |                  | (12.03, 20.50)           | (-0.02, 0.15)       | (-0.88, 1.59) | (0.03, 0.55)      | (-0.01, 0.45)       | (-0.19, 0.19)       | (-0.02, 0.05)       | (13.06, 21.76)    | (5.57, 12.17)         |                     |
|                        | <i>β/week</i>    | -0.04                    | 0.00                | 0.01          | 0.01              | <b>0.01</b>         | <b>0.01</b>         | 0.00                | -0.00             | -0.04                 | -0.01               |
| <b>Infant Sex</b>      | <i>Female</i>    | (-0.20, 0.11)            | (-0.00, 0.00)       | (-0.04, 0.05) | (-0.00, 0.02)     | <b>(0.01, 0.02)</b> | <b>(0.00, 0.01)</b> | (-0.00, 0.00)       | (-0.16, 0.15)     | (-0.16, 0.08)         | (-0.05, 0.03)       |
|                        |                  | 15.35                    | 0.10                | 0.55          | 0.53              | 0.59                | 0.20                | 0.05                | 17.52             | 7.47                  | 1.92 (1.80, 2.04)   |
|                        | <i>Male</i>      | (14.84, 15.86)           | (0.09, 0.11)        | (0.42, 0.67)  | (0.50, 0.56)      | (0.57, 0.62)        | (0.18, 0.22)        | (0.05, 0.06)        | (17.00, 18.04)    | (7.13, 7.82)          |                     |
| <b>Birth Weight</b>    | <i>Intercept</i> | 15.28                    | 0.10                | 0.47          | 0.54              | 0.59                | 0.19                | 0.05                | 17.37             | 7.77                  | 1.88 (1.75, 2.02)   |
|                        |                  | (14.71, 15.86)           | (0.09, 0.11)        | (0.32, 0.61)  | (0.50, 0.57)      | (0.56, 0.62)        | (0.17, 0.22)        | (0.05, 0.06)        | (16.78, 17.95)    | (7.37, 8.16)          |                     |
|                        | <i>β/100g</i>    | 16.36                    | 0.07                | 0.47          | 0.49              | 0.54                | 0.18                | 0.06                | 18.27             | 8.75                  | 2.15 (1.75, 2.56)   |
| <b>Lactation Stage</b> | <i>Intercept</i> | (14.69, 18.02)           | (0.04, 0.10)        | (0.06, 0.88)  | (0.39, 0.58)      | (0.45, 0.62)        | (0.11, 0.24)        | (0.04, 0.07)        | (16.57, 19.97)    | (7.64, 9.87)          |                     |
|                        |                  | -0.12                    | 0.00                | 0.01          | 0.01              | 0.01                | 0.00                | -0.00               | -0.09             | <b>-0.13</b>          | -0.03 (-0.07, 0.02) |
|                        | <i>β/week</i>    | (-0.31, 0.07)            | (-0.00, 0.01)       | (-0.04, 0.05) | (-0.01, 0.02)     | (-0.00, 0.02)       | (-0.01, 0.01)       | (-0.00, 0.00)       | (-0.28, 0.10)     | <b>(-0.26, -0.01)</b> |                     |
| <b>Multiple birth</b>  | <i>Singleton</i> | 14.37                    | 0.09                | 0.54          | 0.63              | 0.67                | 0.24                | 0.07                | 16.73             | 7.66                  | 1.78 (1.67, 1.90)   |
|                        |                  | (13.80, 14.95)           | (0.08, 0.10)        | (0.35, 0.74)  | (0.60, 0.66)      | (0.64, 0.70)        | (0.21, 0.26)        | (0.07, 0.08)        | (16.13, 17.34)    | (7.16, 8.16)          |                     |
|                        | <i>Multiple</i>  | 14.96                    | 0.09                | 0.57          | 0.54              | 0.59                | 0.21                | 0.06                | 17.18             | 7.79                  | 1.88 (1.76, 1.99)   |
| <b>Multiple birth</b>  | <i>Singleton</i> | (14.51, 15.42)           | (0.08, 0.10)        | (0.44, 0.70)  | (0.51, 0.57)      | (0.56, 0.61)        | (0.19, 0.23)        | (0.05, 0.06)        | (16.71, 17.64)    | (7.45, 8.14)          |                     |
|                        |                  | 15.54                    | <b>0.11</b>         | 0.42          | 0.54              | 0.59                | 0.18                | <b>0.05</b>         | 17.53             | 7.28                  | 1.93 (1.74, 2.12)   |
|                        | <i>Multiple</i>  | (14.79, 16.29)           | <b>(0.10, 0.13)</b> | (0.21, 0.63)  | (0.49, 0.58)      | (0.55, 0.63)        | (0.15, 0.22)        | <b>(0.04, 0.05)</b> | (16.76, 18.30)    | (6.72, 7.85)          |                     |

Supplementary Material

|                           |                                 |                       |                |               |                     |                     |                     |                     |                       |                |                          |
|---------------------------|---------------------------------|-----------------------|----------------|---------------|---------------------|---------------------|---------------------|---------------------|-----------------------|----------------|--------------------------|
| <b>BMI</b>                | <i>Underweight</i>              | 14.40                 | 0.11           | 0.44          | 0.55                | 0.61                | 0.22                | 0.05                | 16.53                 | 7.93           | 2.04 (1.68, 2.39)        |
|                           |                                 | (12.97, 15.82)        | (0.09, 0.14)   | (0.00, 0.88)  | (0.46, 0.64)        | (0.53, 0.69)        | (0.15, 0.28)        | (0.04, 0.07)        | (15.06, 18.01)        | (6.76, 9.10)   |                          |
|                           |                                 | 15.50                 | 0.09           | 0.60          | 0.52                | 0.59                | 0.21                | 0.06                | 17.72                 | 7.78           |                          |
|                           | <i>Normal</i>                   | (14.96, 16.04)        | (0.08, 0.10)   | (0.44, 0.76)  | (0.48, 0.55)        | (0.56, 0.62)        | (0.19, 0.24)        | (0.05, 0.06)        | (17.16, 18.27)        | (7.35, 8.21)   | 1.78 (1.65, 1.92)        |
|                           |                                 | 15.68                 | 0.10           | 0.49          | 0.52                | 0.58                | 0.19                | 0.05                | 17.75                 | 7.58           |                          |
|                           |                                 | (15.01, 16.36)        | (0.08, 0.11)   | (0.29, 0.69)  | (0.48, 0.57)        | (0.54, 0.62)        | (0.16, 0.23)        | (0.05, 0.06)        | (17.05, 18.45)        | (7.04, 8.12)   |                          |
|                           | <i>Overweight</i>               | <b>13.30</b>          | 0.11           | 0.43          | <b>0.62</b>         | 0.58                | 0.19                | 0.04                | <b>15.41</b>          | 7.24           | <b>2.26 (2.02, 2.49)</b> |
|                           |                                 | <b>(12.35, 14.25)</b> | (0.09, 0.13)   | (0.14, 0.72)  | <b>(0.56, 0.68)</b> | (0.52, 0.63)        | (0.14, 0.23)        | (0.04, 0.05)        | <b>(14.43, 16.39)</b> | (6.47, 8.02)   |                          |
|                           |                                 | 14.83                 | 0.10           | 0.60          | 0.54                | 0.55                | 0.19                | 0.05                | 17.04                 | 7.69           |                          |
|                           | <b>Delivery</b>                 | <i>Vaginal</i>        | (14.22, 15.44) | (0.09, 0.11)  | (0.42, 0.77)        | (0.50, 0.58)        | (0.52, 0.58)        | (0.17, 0.22)        | (0.04, 0.06)          | (16.41, 17.67) | (7.21, 8.16)             |
| 15.31                     |                                 |                       | 0.09           | 0.48          | 0.54                | <b>0.61</b>         | 0.21                | 0.05                | 17.42                 | 7.63           |                          |
| (14.82, 15.79)            |                                 |                       | (0.08, 0.10)   | (0.34, 0.63)  | (0.51, 0.57)        | <b>(0.58, 0.64)</b> | (0.19, 0.23)        | (0.05, 0.06)        | (16.92, 17.93)        | (7.25, 8.02)   |                          |
| <i>Caesarean</i>          |                                 | 15.35                 | 0.08           | 0.32          | 0.58                | 0.68                | 0.15                | 0.07                | 17.28                 | 7.90           | 2.87 (2.23, 3.51)        |
|                           |                                 | (12.73, 17.97)        | (0.03, 0.13)   | (-0.43, 1.07) | (0.42, 0.74)        | (0.53, 0.82)        | (0.03, 0.27)        | (0.04, 0.09)        | (14.58, 19.97)        | (5.89, 9.92)   |                          |
|                           |                                 | -0.03                 | 0.00           | 0.03          | -0.01               | -0.01               | 0.01                | -0.00               | -0.00                 | -0.04          |                          |
| <b>Maternal Age</b>       | $\beta/5$ years                 | (-0.42, 0.35)         | (-0.00, 0.01)  | (-0.08, 0.14) | (-0.03, 0.02)       | (-0.04, 0.01)       | (-0.01, 0.03)       | (-0.01, 0.00)       | (-0.40, 0.40)         | (-0.34, 0.26)  | <b>(-0.24, -0.05)</b>    |
|                           | <i>Intercept</i>                | 14.92                 | 0.10           | 0.55          | 0.53                | 0.57                | 0.18                | 0.05                | 17.07                 | 7.62           | 1.81 (1.69, 1.92)        |
| <b>Parity</b>             | <i>1</i>                        | (14.44, 15.41)        | (0.09, 0.11)   | (0.41, 0.69)  | (0.50, 0.56)        | (0.55, 0.60)        | (0.16, 0.20)        | (0.05, 0.06)        | (16.57, 17.57)        | (7.25, 8.00)   |                          |
|                           |                                 | 15.44                 | 0.10           | 0.49          | 0.55                | 0.61                | <b>0.24</b>         | 0.05                | 17.61                 | 7.71           |                          |
|                           | <i>&gt;1</i>                    | (14.82, 16.07)        | (0.09, 0.11)   | (0.31, 0.67)  | (0.52, 0.59)        | (0.57, 0.64)        | <b>(0.22, 0.27)</b> | (0.05, 0.06)        | (16.97, 18.25)        | (7.22, 8.20)   | <b>2.02 (1.87, 2.17)</b> |
| <b>Maternal Education</b> | <i>No post-secondary degree</i> | 14.46                 | 0.09           | 0.47          | 0.53                | <b>0.64</b>         | 0.24                | <b>0.06</b>         | 16.62                 | 7.56           | 1.90 (1.66, 2.15)        |
|                           |                                 | (13.47, 15.44)        | (0.07, 0.11)   | (0.19, 0.76)  | (0.47, 0.59)        | <b>(0.58, 0.69)</b> | (0.20, 0.29)        | <b>(0.05, 0.07)</b> | (15.61, 17.64)        | (6.79, 8.32)   |                          |

## Supplementary Material

|                           |                                |                                       |                                    |                                    |                                    |                                    |                                    |                                    |                                       |                         |                          |
|---------------------------|--------------------------------|---------------------------------------|------------------------------------|------------------------------------|------------------------------------|------------------------------------|------------------------------------|------------------------------------|---------------------------------------|-------------------------|--------------------------|
| <b>Maternal Ethnicity</b> | <i>Post-secondary Degree</i>   | 15.26<br>(14.84, 15.69)               | 0.10<br>(0.09, 0.11)               | 0.54<br>(0.42, 0.66)               | 0.54<br>(0.51, 0.56)               | 0.58<br>(0.55, 0.60)               | 0.20<br>(0.18, 0.21)               | 0.05<br>(0.05, 0.05)               | 17.41<br>(16.98, 17.85)               | 7.67<br>(7.34, 7.99)    | 1.89 (1.78, 1.99)        |
|                           | <i>European</i>                | 14.77<br>(14.14, 15.40)               | 0.12<br>(0.11, 0.14)               | 0.44<br>(0.26, 0.62)               | 0.58<br>(0.54, 0.61)               | 0.56<br>(0.53, 0.60)               | 0.17<br>(0.14, 0.20)               | 0.05<br>(0.04, 0.05)               | 16.80<br>(16.16, 17.45)               | 7.47<br>(6.98, 7.95)    | 2.08 (1.92, 2.24)        |
|                           | <i>East or Southeast Asian</i> | <b>16.09</b><br><b>(15.32, 16.87)</b> | <b>0.08</b><br><b>(0.06, 0.09)</b> | <b>0.73</b><br><b>(0.51, 0.96)</b> | <b>0.46</b><br><b>(0.41, 0.51)</b> | 0.56<br>(0.52, 0.60)               | <b>0.25</b><br><b>(0.22, 0.28)</b> | <b>0.06</b><br><b>(0.05, 0.07)</b> | <b>18.44</b><br><b>(17.64, 19.23)</b> | 8.02<br>(7.42, 8.62)    | <b>1.58 (1.38, 1.77)</b> |
|                           | <i>South or West Asian</i>     | 14.94<br>(14.01, 15.87)               | <b>0.09</b><br><b>(0.07, 0.11)</b> | 0.47<br>(0.19, 0.75)               | 0.56<br>(0.50, 0.62)               | 0.55<br>(0.50, 0.60)               | 0.18<br>(0.14, 0.23)               | <b>0.06</b><br><b>(0.05, 0.06)</b> | 17.01<br>(16.05, 17.96)               | 7.18<br>(6.44, 7.92)    | 1.88 (1.65, 2.11)        |
|                           | <i>African or Caribbean</i>    | 15.21<br>(14.38, 16.04)               | <b>0.09</b><br><b>(0.08, 0.11)</b> | 0.50<br>(0.25, 0.75)               | 0.54<br>(0.49, 0.59)               | <b>0.67</b><br><b>(0.63, 0.72)</b> | 0.21<br>(0.18, 0.25)               | <b>0.06</b><br><b>(0.05, 0.06)</b> | 17.40<br>(16.54, 18.25)               | 7.86<br>(7.20, 8.52)    | 1.86 (1.66, 2.06)        |
|                           | <i>Other</i>                   | <b>12.42</b><br><b>(10.16, 14.67)</b> | <b>0.05</b><br><b>(0.01, 0.09)</b> | 0.50<br>(-0.26, 1.26)              | 0.52<br>(0.39, 0.66)               | <b>0.74</b><br><b>(0.62, 0.86)</b> | 0.22<br>(0.12, 0.33)               | 0.07<br>(0.05, 0.09)               | <b>14.69</b><br><b>(12.36, 17.03)</b> | 8.16<br>(6.22, 10.09)   | 2.20 (1.69, 2.70)        |
|                           | <i>Above poverty line</i>      | 14.99<br>(14.56, 15.41)               | 0.10<br>(0.09, 0.11)               | 0.54<br>(0.42, 0.66)               | 0.54<br>(0.51, 0.57)               | 0.58<br>(0.56, 0.61)               | 0.19<br>(0.17, 0.21)               | 0.05<br>(0.05, 0.06)               | 17.14<br>(16.70, 17.59)               | 7.65<br>(7.31, 7.98)    | 1.88 (1.77, 1.99)        |
|                           | <i>Below poverty line</i>      | 15.73<br>(14.85, 16.61)               | 0.08<br>(0.07, 0.10)               | 0.48<br>(0.22, 0.74)               | 0.53<br>(0.47, 0.59)               | 0.59<br>(0.55, 0.64)               | <b>0.25</b><br><b>(0.21, 0.29)</b> | 0.06<br>(0.05, 0.07)               | 17.84<br>(16.94, 18.75)               | 7.74<br>(7.05, 8.42)    | 1.96 (1.74, 2.19)        |
|                           | <i>Yes</i>                     | 15.07<br>(14.50, 15.64)               | 0.09<br>(0.08, 0.11)               | 0.59<br>(0.42, 0.77)               | 0.53<br>(0.49, 0.56)               | 0.57<br>(0.54, 0.60)               | 0.21<br>(0.19, 0.24)               | 0.05<br>(0.05, 0.06)               | 17.29<br>(16.71, 17.87)               | 7.83<br>(7.38, 8.28)    | 1.91 (1.78, 2.05)        |
|                           | <b>English</b>                 | <i>Mixed</i>                          | 14.81<br>(14.09, 15.54)            | 0.10<br>(0.08, 0.11)               | 0.46<br>(0.25, 0.68)               | 0.55<br>(0.50, 0.59)               | 0.59<br>(0.55, 0.63)               | 0.20<br>(0.17, 0.23)               | 0.05<br>(0.05, 0.06)                  | 16.88<br>(16.14, 17.62) | 7.46<br>(6.90, 8.03)     |
|                           | <i>No</i>                      | 16.25<br>(14.99, 17.51)               | 0.12<br>(0.10, 0.14)               | 0.48<br>(0.11, 0.85)               | 0.54<br>(0.47, 0.62)               | 0.62<br>(0.56, 0.69)               | 0.18<br>(0.12, 0.24)               | 0.06<br>(0.05, 0.07)               | 18.38<br>(17.09, 19.66)               | 8.06<br>(7.08, 9.05)    | 1.64 (1.34, 1.94)        |

Supplementary Material

|                       |                |                       |              |              |              |                     |                     |              |                       |              |                          |
|-----------------------|----------------|-----------------------|--------------|--------------|--------------|---------------------|---------------------|--------------|-----------------------|--------------|--------------------------|
| <b>Marital Status</b> | <i>Single</i>  | 14.65                 | 0.09         | 0.48 (-      | 0.57         | 0.64                | 0.19                | 0.06         | 16.84                 | 8.14         | 1.78 (1.35, 2.20)        |
|                       |                | (12.89, 16.42)        | (0.05, 0.12) | 0.06, 1.03)  | (0.46, 0.67) | (0.55, 0.74)        | (0.11, 0.27)        | (0.05, 0.08) | (15.02, 18.65)        | (6.72, 9.56) |                          |
|                       | <i>Married</i> | 15.14                 | 0.10         | 0.54         | 0.53         | 0.58                | 0.20                | 0.05         | 17.30                 | 7.70         | 1.86 (1.75, 1.96)        |
|                       |                | (14.71, 15.58)        | (0.09, 0.11) | (0.41, 0.67) | (0.51, 0.56) | (0.56, 0.60)        | (0.18, 0.23)        | (0.05, 0.06) | (16.86, 17.74)        | (7.36, 8.04) |                          |
| <b>Smoking</b>        | <i>No</i>      | 15.24                 | 0.10         | 0.53         | 0.54         | 0.58                | 0.20                | 0.05         | 17.39                 | 7.67         | 1.86 (1.76, 1.96)        |
|                       |                | (14.85, 15.64)        | (0.09, 0.11) | (0.42, 0.64) | (0.51, 0.56) | (0.56, 0.60)        | (0.18, 0.22)        | (0.05, 0.06) | (16.99, 17.80)        | (7.36, 7.97) |                          |
|                       | <i>Yes</i>     | <b>12.67</b>          | 0.07         | 0.48 (-      | 0.51         | <b>0.68</b>         | 0.24                | 0.06         | <b>14.87</b>          | 7.42         | <b>2.41 (2.02, 2.81)</b> |
|                       |                | <b>(10.94, 14.41)</b> | (0.04, 0.10) | 0.07, 1.02)  | (0.40, 0.62) | <b>(0.58, 0.77)</b> | (0.16, 0.32)        | (0.04, 0.08) | <b>(13.07, 16.67)</b> | (5.99, 8.86) |                          |
|                       | <i>Spring</i>  | 15.29                 | 0.10         | 0.49         | 0.56         | 0.58                | 0.19                | 0.05         | 17.42                 | 7.65         | 1.90 (1.72, 2.09)        |
|                       |                | (14.57, 16.01)        | (0.09, 0.12) | (0.27, 0.70) | (0.52, 0.61) | (0.54, 0.62)        | (0.16, 0.22)        | (0.05, 0.06) | (16.68, 18.16)        | (7.09, 8.22) |                          |
| <b>Season</b>         | <i>Fall</i>    | 15.22                 | 0.08         | 0.77         | 0.52         | 0.56                | <b>0.27</b>         | 0.05         | 17.69                 | 8.11         | 1.91 (1.69, 2.12)        |
|                       |                | (14.39, 16.04)        | (0.07, 0.10) | (0.54, 1.01) | (0.47, 0.58) | (0.52, 0.61)        | <b>(0.23, 0.31)</b> | (0.05, 0.06) | (16.84, 18.53)        | (7.48, 8.75) |                          |
|                       | <i>Summer</i>  | 14.33                 | 0.10         | 0.43         | 0.53         | 0.61                | 0.19                | 0.05         | 16.37                 | 7.19         | 1.87 (1.66, 2.08)        |
|                       |                | (13.50, 15.15)        | (0.09, 0.12) | (0.19, 0.67) | (0.48, 0.58) | (0.56, 0.65)        | (0.16, 0.23)        | (0.04, 0.06) | (15.52, 17.21)        | (6.55, 7.83) |                          |
|                       | <i>Winter</i>  | 15.47                 | 0.10         | 0.46         | 0.52         | 0.59                | 0.17                | 0.05         | 17.49                 | 7.65         | 1.89 (1.70, 2.07)        |
|                       |                | (14.76, 16.18)        | (0.09, 0.11) | (0.26, 0.66) | (0.48, 0.57) | (0.55, 0.63)        | (0.14, 0.21)        | (0.05, 0.06) | (16.77, 18.22)        | (7.11, 8.20) |                          |

<sup>1</sup>Unadjusted means (categorical variables) and  $\beta$  estimates + intercepts (continuous variables) of infant, maternal, sociodemographic, or environmental factors with mother's milk fatty acid composition standard deviation scores. A negative sign indicates a negative association. Values in **bold** indicate a statistically significant association for continuous variables or significant difference from the top

Hopperton *et al.* Determinants of fatty acid content and composition of human milk fed to infants born <1250g - Online

Supplementary Material

(reference) category for categorical variables (p<0.05). Sample size is 100 mothers, 472 human milk samples. Associations were analyzed using PROC MIXED accounting for repeated measures using an autoregressive correlation structure.

Alpha linolenic acid (ALA), Arachidonic acid (ARA), Docosahexaenoic acid (DHA), Docosapentaenoic acid (DPA), Eicosapentaenoic acid (EPA), Female (F), Dihomo gamma linolenic acid (DGLA), Gamma linolenic acid (GLA), Linoleic acid (LA), Monounsaturated fatty acid (MUFA), Polyunsaturated fatty acid (PUFA), Saturated Fatty Acids (SFA), Standard deviation scores (SDS).

## Supplementary Material

**Supplementary TABLE 4** Estimated intakes of fat and fatty acids at full enteral feeding volumes (160 ml/kg/day)<sup>1</sup>

| Fatty Acid                 | Intakes from Donor Milk (g/kg/day) | Intakes from Average MoM (g/kg/day) | Intake Difference with 100% Donor Milk vs MoM (g/kg/day) |               |               |               |
|----------------------------|------------------------------------|-------------------------------------|----------------------------------------------------------|---------------|---------------|---------------|
|                            |                                    |                                     | Colostrum                                                | Transitional  | Early-Mature  | Later-Mature  |
| <b>Total Fat</b>           | <b>5.220</b>                       | <b>5.960</b>                        | <b>0.088</b>                                             | <b>-0.961</b> | <b>-0.832</b> | <b>-1.259</b> |
| 10:0 (capric acid)         | 0.016                              | 0.017                               | 0.013                                                    | -0.007        | -0.004        | -0.005        |
| 12:0 (lauric acid)         | 0.149                              | 0.268                               | -0.010                                                   | -0.184        | -0.145        | -0.140        |
| 14:0 (myristic acid)       | 0.239                              | 0.443                               | -0.093                                                   | -0.274        | -0.222        | -0.225        |
| 16:0 (palmitic acid)       | 0.948                              | 1.271                               | -0.199                                                   | -0.359        | -0.332        | -0.405        |
| 18:0 (stearic acid)        | 0.268                              | 0.334                               | -0.018                                                   | -0.070        | -0.082        | -0.095        |
| 20:0                       | 0.007                              | 0.010                               | -0.002                                                   | -0.003        | -0.003        | -0.003        |
| 21:0                       | 0.007                              | 0.005                               | 0.003                                                    | 0.002         | 0.001         | 0.002         |
| 22:0                       | 0.003                              | 0.004                               | -0.001                                                   | -0.001        | -0.001        | -0.001        |
| 23:0                       | 0.005                              | 0.007                               | -0.001                                                   | -0.003        | -0.002        | -0.002        |
| 24:0                       | 0.002                              | 0.005                               | -0.004                                                   | -0.003        | -0.002        | -0.002        |
| <b>Total SFA</b>           | <b>1.663</b>                       | <b>2.403</b>                        | <b>-0.350</b>                                            | <b>-0.914</b> | <b>-0.808</b> | <b>-0.889</b> |
| 14:1n-5                    | 0.011                              | 0.010                               | 0.004                                                    | 0.000         | -0.001        | -0.001        |
| 16:1n-7 (palmitoleic acid) | 0.138                              | 0.133                               | 0.027                                                    | 0.005         | 0.000         | -0.013        |
| 17:1n-7                    | 0.010                              | 0.010                               | 0.001                                                    | 0.000         | -0.001        | -0.001        |
| 18:1n-7                    | 0.099                              | 0.118                               | -0.011                                                   | -0.024        | -0.015        | -0.025        |
| 18:1n-9 (oleic acid)       | 2.076                              | 2.059                               | 0.283                                                    | -0.017        | 0.008         | -0.205        |
| 20:1n-9                    | 0.024                              | 0.034                               | -0.010                                                   | -0.012        | -0.007        | -0.008        |
| 22:1n-9                    | 0.003                              | 0.006                               | -0.005                                                   | -0.004        | -0.002        | -0.002        |

## Supplementary Material

|                        |              |              |              |               |               |               |
|------------------------|--------------|--------------|--------------|---------------|---------------|---------------|
| 24:1n-9                | 0.001        | 0.006        | -0.008       | -0.006        | -0.003        | -0.002        |
| <b>Total MUFA</b>      | <b>2.402</b> | <b>2.425</b> | <b>0.290</b> | <b>-0.072</b> | <b>-0.033</b> | <b>-0.276</b> |
| 18:3n-3 (ALA)          | 0.115        | 0.106        | 0.027        | 0.013         | 0.008         | -0.011        |
| 20:3n-3                | 0.003        | 0.006        | -0.004       | -0.004        | -0.003        | -0.002        |
| 20:5n-3 (EPA)          | 0.007        | 0.005        | 0.003        | 0.002         | 0.002         | 0.002         |
| 22:5n-3 (DPA)          | 0.011        | 0.012        | -0.002       | -0.001        | 0.000         | -0.001        |
| 22:6n-3 (DHA)          | 0.016        | 0.022        | -0.008       | -0.009        | -0.005        | -0.003        |
| <b>Total n-3 PUFA</b>  | <b>0.150</b> | <b>0.150</b> | <b>0.016</b> | <b>0.001</b>  | <b>0.003</b>  | <b>-0.018</b> |
| 18:2n-6 (LA)           | 0.955        | 0.914        | 0.170        | 0.059         | 0.019         | -0.085        |
| 18:3n-6 (GLA)          | 0.008        | 0.006        | 0.004        | 0.003         | 0.001         | 0.000         |
| 20:2n-6                | 0.014        | 0.030        | -0.021       | -0.019        | -0.013        | -0.011        |
| 20:3n-6 (DGLA)         | 0.021        | 0.033        | -0.015       | -0.015        | -0.010        | -0.007        |
| 20:4n-6 (ARA)          | 0.032        | 0.036        | -0.005       | -0.009        | -0.003        | -0.001        |
| 22:4n-6 (adrenic acid) | 0.012        | 0.013        | -0.005       | -0.001        | 0.000         | 0.002         |
| 22:5n-6                | 0.002        | 0.003        | -0.003       | -0.003        | -0.001        | -0.001        |
| <b>Total n-6 PUFA</b>  | <b>1.049</b> | <b>1.042</b> | <b>0.126</b> | <b>0.009</b>  | <b>-0.006</b> | <b>-0.104</b> |

<sup>1</sup>Simulated diet based on mean fat and fatty acid contents (g/dl) of pooled donor human milk batches fed during the OptiMoM study (n=53) and mother's own milk (n=100 mothers) fed at full enteral feeding volumes (160 ml/kg/day). Colostrum was collected on post-partum days 1-4, transitional milk (days 8-14), early-mature milk (days 15-40), later-mature milk (>40 days).

Alpha linolenic acid (ALA), Arachidonic acid (ARA), Docosahexaenoic acid (DHA), Docosapentaenoic acid (DPA), Eicosapentaenoic acid (EPA), Dihomo gamma linolenic acid (DGLA), Gamma linolenic acid (GLA), Linoleic acid (LA), Mother's own Milk (MoM), Monounsaturated fatty acid (MUFA), Polyunsaturated fatty acid (PUFA), Saturated fatty acids (SFA).



## Supplementary Material

**Supplementary TABLE 5** Model 1 Unadjusted fatty acid intakes (g/kg/day) of VLBW infants fed >50% donor milk compared to 100% mother's milk<sup>1</sup>

|                         | Weeks 1 and 2      |         |          |         |                      |              | Week 4             |         |          |         |                      |              |
|-------------------------|--------------------|---------|----------|---------|----------------------|--------------|--------------------|---------|----------|---------|----------------------|--------------|
|                         | Model 1 Means (SE) |         |          |         | Model 1 <sup>2</sup> |              | Model 1 Means (SE) |         |          |         | Model 1 <sup>2</sup> |              |
|                         | >50% DM            |         | 100% MoM |         | $\beta$ (SE)         |              | >50% DM            |         | 100% MoM |         | $\beta$ (SE)         |              |
| <b>Intakes g/kg/day</b> |                    |         |          |         |                      |              |                    |         |          |         |                      |              |
| <b>Total Fat</b>        | 4.287              | (0.439) | 5.670    | (0.398) | <b>-1.383</b>        | <b>0.593</b> | 4.765              | (0.364) | 5.181    | (0.307) | -0.416               | 0.476        |
| 10:0                    | 0.011              | (0.015) | 0.028    | (0.014) | -0.017               | 0.020        | 0.015              | (0.005) | 0.017    | (0.004) | -0.001               | 0.006        |
| 12:0                    | 0.104              | (0.104) | 0.334    | (0.096) | -0.231               | 0.141        | 0.147              | (0.023) | 0.252    | (0.019) | <b>-0.105</b>        | <b>0.030</b> |
| 14:0                    | 0.176              | (0.067) | 0.415    | (0.061) | <b>-0.238</b>        | <b>0.091</b> | 0.227              | (0.031) | 0.353    | (0.027) | <b>-0.126</b>        | <b>0.041</b> |
| 16:0                    | 0.748              | (0.112) | 1.221    | (0.102) | <b>-0.473</b>        | <b>0.151</b> | 0.865              | (0.095) | 1.095    | (0.080) | -0.230               | 0.125        |
| 18:0                    | 0.204              | (0.042) | 0.314    | (0.039) | -0.110               | 0.059        | 0.242              | (0.032) | 0.306    | (0.027) | -0.064               | 0.042        |
| 20:0                    | 0.005              | (0.001) | 0.010    | (0.001) | <b>-0.004</b>        | <b>0.001</b> | 0.006              | (0.001) | 0.009    | (0.001) | <b>-0.003</b>        | <b>0.001</b> |
| 21:0                    | 0.005              | (0.001) | 0.004    | (0.001) | 0.001                | 0.001        | 0.006              | (0.001) | 0.003    | (0.000) | <b>0.004</b>         | <b>0.001</b> |
| 22:0                    | 0.002              | (0.001) | 0.005    | (0.001) | <b>-0.003</b>        | <b>0.001</b> | 0.002              | (0.001) | 0.005    | (0.000) | <b>-0.002</b>        | <b>0.001</b> |
| 23:0                    | 0.004              | (0.001) | 0.007    | (0.001) | <b>-0.003</b>        | <b>0.001</b> | 0.005              | (0.001) | 0.005    | (0.000) | 0.000                | 0.001        |
| 24:0                    | 0.002              | (0.001) | 0.005    | (0.001) | <b>-0.004</b>        | <b>0.001</b> | 0.002              | (0.001) | 0.004    | (0.001) | <b>-0.002</b>        | <b>0.001</b> |
| <b>Total SFA</b>        | 1.271              | (0.289) | 2.405    | (0.265) | <b>-1.135</b>        | <b>0.392</b> | 1.539              | (0.168) | 2.082    | (0.142) | <b>-0.543</b>        | <b>0.220</b> |
| 14:1n-5                 | 0.009              | (0.001) | 0.008    | (0.001) | 0.000                | 0.002        | 0.010              | (0.001) | 0.007    | (0.001) | <b>0.003</b>         | <b>0.001</b> |
| 16:1n-7                 | 0.110              | (0.014) | 0.122    | (0.012) | -0.013               | 0.018        | 0.125              | (0.010) | 0.105    | (0.009) | 0.020                | 0.013        |
| 17:1n-7                 | 0.008              | (0.002) | 0.010    | (0.001) | -0.003               | 0.002        | 0.009              | (0.001) | 0.008    | (0.001) | 0.001                | 0.001        |
| 18:1n-7                 | 0.080              | (0.009) | 0.105    | (0.008) | -0.025               | 0.012        | 0.090              | (0.007) | 0.095    | (0.006) | -0.004               | 0.009        |
| 18:1n-9                 | 1.729              | (0.142) | 1.883    | (0.129) | -0.154               | 0.192        | 1.884              | (0.134) | 1.833    | (0.113) | 0.050                | 0.175        |
| 20:1n-9                 | 0.019              | (0.002) | 0.031    | (0.002) | <b>-0.011</b>        | <b>0.003</b> | 0.022              | (0.002) | 0.030    | (0.002) | <b>-0.008</b>        | <b>0.003</b> |
| 22:1n-9                 | 0.002              | (0.000) | 0.005    | (0.000) | <b>-0.003</b>        | <b>0.001</b> | 0.003              | (0.000) | 0.005    | (0.000) | <b>-0.002</b>        | <b>0.000</b> |
| 24:1n-9                 | 0.001              | (0.000) | 0.006    | (0.000) | <b>-0.005</b>        | <b>0.001</b> | 0.001              | (0.000) | 0.004    | (0.000) | <b>-0.003</b>        | <b>0.000</b> |

## Supplementary Material

|                       |       |         |       |         |               |              |       |         |       |         |               |              |
|-----------------------|-------|---------|-------|---------|---------------|--------------|-------|---------|-------|---------|---------------|--------------|
| <b>Total MUFA</b>     | 1.995 | (0.170) | 2.248 | (0.154) | -0.253        | 0.229        | 2.181 | (0.154) | 2.141 | (0.130) | 0.040         | 0.202        |
| 18:3n-3 (ALA)         | 0.094 | (0.008) | 0.075 | (0.008) | 0.019         | 0.011        | 0.104 | (0.006) | 0.085 | (0.005) | <b>0.019</b>  | <b>0.008</b> |
| 20:3n-3               | 0.002 | (0.000) | 0.005 | (0.000) | <b>-0.003</b> | <b>0.000</b> | 0.003 | (0.000) | 0.004 | (0.000) | <b>-0.002</b> | <b>0.000</b> |
| 20:5n-3 (EPA)         | 0.006 | (0.001) | 0.004 | (0.001) | 0.002         | 0.001        | 0.006 | (0.000) | 0.003 | (0.000) | <b>0.003</b>  | <b>0.000</b> |
| 22:5n-3 (DPA)         | 0.009 | (0.001) | 0.009 | (0.001) | 0.001         | 0.001        | 0.010 | (0.001) | 0.007 | (0.000) | <b>0.003</b>  | <b>0.001</b> |
| 22:6n-3 (DHA)         | 0.012 | (0.003) | 0.022 | (0.002) | <b>-0.010</b> | <b>0.004</b> | 0.014 | (0.001) | 0.014 | (0.001) | 0.000         | 0.002        |
| <b>Total n-3 PUFA</b> | 0.125 | (0.010) | 0.115 | (0.009) | 0.010         | 0.013        | 0.136 | (0.008) | 0.110 | (0.007) | <b>0.025</b>  | <b>0.011</b> |
| 18:2n-6 (LA)          | 0.783 | (0.071) | 0.790 | (0.064) | -0.007        | 0.095        | 0.864 | (0.057) | 0.819 | (0.048) | 0.045         | 0.074        |
| 18:3n-6 (GLA)         | 0.006 | (0.001) | 0.005 | (0.001) | 0.001         | 0.001        | 0.007 | (0.001) | 0.005 | (0.000) | <b>0.002</b>  | <b>0.001</b> |
| 20:2n-6               | 0.011 | (0.003) | 0.028 | (0.002) | <b>-0.018</b> | <b>0.004</b> | 0.013 | (0.002) | 0.024 | (0.002) | <b>-0.011</b> | <b>0.002</b> |
| 20:3n-6 (DGLA)        | 0.016 | (0.003) | 0.029 | (0.003) | <b>-0.013</b> | <b>0.004</b> | 0.019 | (0.002) | 0.213 | (0.002) | -0.002        | 0.003        |
| 20:4n-6 (ARA)         | 0.026 | (0.003) | 0.029 | (0.002) | -0.003        | 0.003        | 0.029 | (0.002) | 0.023 | (0.001) | <b>0.005</b>  | <b>0.002</b> |
| 22:4n-6               | 0.010 | (0.001) | 0.007 | (0.001) | <b>0.003</b>  | <b>0.001</b> | 0.011 | (0.000) | 0.005 | (0.000) | <b>0.006</b>  | <b>0.001</b> |
| 22:5n-6               | 0.001 | (0.000) | 0.003 | (0.000) | <b>-0.002</b> | <b>0.000</b> | 0.001 | (0.000) | 0.002 | (0.000) | <b>-0.001</b> | <b>0.000</b> |
| <b>Total n-6 PUFA</b> | 0.860 | (0.078) | 0.903 | (0.071) | -0.042        | 0.105        | 0.949 | (0.062) | 0.906 | (0.053) | 0.043         | 0.082        |
| <b>n-6:n-3 PUFA</b>   | 7.005 | (0.425) | 8.049 | (0.391) | -1.044        | 0.577        | 6.986 | (1.462) | 9.820 | (1.234) | -2.833        | 1.913        |
| <b>ARA:DHA</b>        | 2.027 | (0.142) | 1.466 | (0.131) | <b>0.561</b>  | <b>0.193</b> | 1.995 | (0.093) | 1.739 | (0.078) | <b>0.256</b>  | <b>0.121</b> |

<sup>1</sup>Difference in intakes calculated for a subset of infants in the OptiMoM study at weeks 1 and 2 of life (n=13, days 1-14) and week 4 (n=31, days 22-28) not receiving parenteral nutrition, and in the bovine milk-based fortifier group between those receiving >50% donor milk and 100% mother's milk. Associations were analyzed using PROC MIXED accounting for repeated measures using an autoregressive correlation structure. Bold values indicated statistically significant differences in  $\beta$  estimates ( $p < 0.05$ ).

<sup>2</sup>Estimates adjusted only for repeated measurements within subjects.

Alpha linolenic acid (ALA), Arachidonic acid (ARA), Docosahexaenoic acid (DHA), Donor milk (DM) Docosapentaenoic acid (DPA), Eicosapentaenoic acid (EPA), Dihomo gamma linolenic acid (DGLA), Gamma linolenic acid (GLA), Linoleic acid (LA), Mother's own Milk (MoM), Monounsaturated fatty acid (MUFA), Polyunsaturated fatty acid (PUFA), Saturated fatty acids (SFA).

**Supplementary TABLE 6** Characteristics of participants with week 1 and 2 fatty acid intakes

| Characteristics                                          | Intakes Available<br>(n=13) | No Intakes Available<br>(n=112) |
|----------------------------------------------------------|-----------------------------|---------------------------------|
| Sex, No. (% female) <sup>1</sup>                         | 8 (61.5)                    | 63 (56.3)                       |
| Birth weight, mean (SD), g                               | 971.5 (196.8)               | 877.7 (201.8)                   |
| Gestational age at birth <sup>2</sup> , mean (SD), weeks | 28.8 (2.3)                  | 27.6 (2.5)                      |
| Multiple birth status, No. (%)                           | 3 (23.1)                    | 41 (36.6)                       |
| Small for gestational age, No. (%)                       | 5 (38.5)                    | 24 (21.4)                       |
| Received antenatal steroids, No. (%)                     | 12 (92.3)                   | 98 (87.5)                       |
| SNAP-II score <sup>3</sup> , mean (SD)                   | 17.2 (15.0)                 | 13.2 (10.5)                     |
| Apgar score at 5 min, mean (SD)                          | 7.7 (1.4)                   | 7.3 (2.3)                       |
| Caesarean delivery, No. (%)                              | 9 (69.2)                    | 68 (60.7)                       |
| Season of Delivery                                       |                             |                                 |
| Winter                                                   | 3 (23.1)                    | 37 (33.0)                       |
| Spring                                                   | 3 (23.1)                    | 28 (25.0)                       |
| Summer                                                   | 5 (38.5)                    | 22 (19.6)                       |
| Fall                                                     | 2 (15.4)                    | 25 (22.3)                       |
| Mother's age, mean (SD), years                           | 34.2 (8.1)                  | 33.2 (4.9)                      |
| Mother's education, No. (%)                              |                             |                                 |
| High school or less                                      | 4 (30.8)                    | 15 (13.6)                       |
| College or vocational diploma                            | 5 (38.5)                    | 41 (37.3)                       |
| Baccalaureate                                            | 4 (30.8)                    | 37 (33.6)                       |
| Post-baccalaureate                                       | 0 (0.0)                     | 17 (15.5)                       |
| Mother's ethnicity, No. (%)                              |                             |                                 |
| Eastern or Western European                              | 2 (15.4)                    | 40 (36.4)                       |
| East or Southeast Asian                                  | 4 (30.8)                    | 23 (20.9)                       |
| South or West Asian                                      | 1 (7.7)                     | 21 (19.1)                       |
| African or Caribbean                                     | 5 (38.5)                    | 21 (19.1)                       |
| Other (Latin American, and mixed backgrounds)            | 1 (7.7)                     | 5 (4.6)                         |
| Maternal parity >1, No. (%)                              | 4 (30.8)                    | 42 (37.5)                       |
| Maternal BMI, mean (SD), kg/m <sup>2</sup>               | 28.2 (9.0)                  | 25.5 (5.8)                      |
| Maternal smoking, No. (%)                                | 3 (23.1)                    | 7 (6.3)                         |
| Language spoken at home                                  |                             |                                 |
| English                                                  | 6 (54.6)                    | 55 (56.1)                       |
| Mixed English and other language                         | 2 (18.2)                    | 31 (31.6)                       |
| Language other than English                              | 3 (27.3)                    | 12 (12.2)                       |

born <1250g - Online Supplementary Material

|                                                             |          |           |
|-------------------------------------------------------------|----------|-----------|
| Not Married, No. (%)                                        | 1 (9.1)  | 6 (6.1)   |
| Family living below the poverty line <sup>4</sup> , No. (%) | 3 (23.1) | 27 (24.1) |
| Morbidity composite <sup>5</sup> , No. (%)                  | 2 (15.4) | 50 (44.6) |
| Brain injury <sup>6</sup> , No. (%)                         | 1 (7.7)  | 18 (16.1) |

---

<sup>1</sup>Data are expressed as mean (SD) or frequency count (%). Baseline characteristics were compared between recruited participants with and without milk samples available for analysis using t-tests or Wilcoxon rank-sum tests and chi-square tests for continuous and categorical variables as appropriate.

<sup>2</sup>Gestational age determined using maternal estimates of last menstrual period. If early ultrasound prediction differed by two weeks or more, the gestational age estimate derived from early ultrasound was used.

<sup>3</sup>Score for Neonatal Acute Physiology II. Scores may range from 0 to 100 with higher values indicating higher neonatal risk and newborn illness.

<sup>4</sup>Based on 2012 Statistics Canada family size-adjusted cut-off values.

<sup>5</sup>Includes late-onset sepsis, chronic lung disease, necrotizing enterocolitis, retinopathy of prematurity requiring treatment.

<sup>6</sup>Includes echodense intraparenchymal lesions, periventricular leukomalacia, porencephalic cysts, or ventriculomegaly with or without intraventricular hemorrhage.

Appearance pulse grimace, activity respiration (Apgar), Human milk-based fortifier group (HMBF), Score for neonatal acute physiology (SNAP).

**Supplementary TABLE 7** Characteristics of participants with week 4 fatty acid intakes

| Characteristics                                       | Intakes Available<br>(n=31) | No Intakes Available<br>(n=94) |
|-------------------------------------------------------|-----------------------------|--------------------------------|
| Sex, No. (% female) <sup>1</sup>                      | 20 (64.5)                   | 51 (54.3)                      |
| Birth weight, mean (SD), g                            | 885.2 (197.8)               | 888.2 (205.1)                  |
| Gestational age at birth <sup>2</sup> , mean (SD), wk | 27.4 (2.2)                  | 27.8 (2.6)                     |
| Multiple birth status, No. (%)                        | 10 (32.3)                   | 34 (36.2)                      |
| Small for gestational age, No. (%)                    | 7 (22.6)                    | 22 (23.4)                      |
| Received antenatal steroids, No. (%)                  | 26 (83.9)                   | 84 (89.4)                      |
| SNAP-II score <sup>3</sup> , mean (SD)                | 16.5 (12.7)                 | 12.7 (10.4)                    |
| Apgar score at 5 min, mean (SD)                       | 7.4 (2.1)                   | 7.3 (2.2)                      |
| Caesarean delivery, No. (%)                           | 18 (58.1)                   | 59 (62.8)                      |
| Season of Delivery                                    |                             |                                |
| Winter                                                | 11 (35.5)                   | 29 (30.9)                      |
| Spring                                                | 9 (29.0)                    | 22 (23.4)                      |
| Summer                                                | 4 (12.9)                    | 23 (24.5)                      |
| Fall                                                  | 7 (22.6)                    | 20 (21.3)                      |
| Mother's age, mean (SD), yrs                          | 32.4 (6.6)                  | 33.6 (4.8)                     |
| Mother's education, No. (%)                           |                             |                                |
| High school or less                                   | 6 (19.4)                    | 13 (14.1)                      |
| College or vocational diploma                         | 8 (25.8)                    | 38 (41.3)                      |
| Baccalaureate                                         | 12 (38.7)                   | 29 (31.5)                      |
| Post-baccalaureate                                    | 5 (16.1)                    | 12 (13.0)                      |
| Mother's ethnicity, No. (%)                           |                             |                                |
| Eastern or Western European                           | 6 (19.4)                    | 36 (39.1)                      |
| East or Southeast Asian                               | 7 (22.6)                    | 20 (21.7)                      |
| South or West Asian                                   | 8 (25.8)                    | 14 (15.2)                      |
| African or Caribbean                                  | 8 (25.8)                    | 18 (19.6)                      |
| Other (including Latin American or mixed ethnicities) | 2 (6.5)                     | 4 (4.4)                        |
| Maternal parity >1, No. (%)                           | 10 (32.3)                   | 36 (38.3)                      |
| Maternal BMI, mean (SD)                               | 24.9 (7.5)                  | 26.0 (5.8)                     |
| Maternal smoking                                      | 3 (9.7)                     | 7 (7.5)                        |
| Language spoken at home                               |                             |                                |
| English                                               | 14 (51.9)                   | 47 (57.3)                      |
| Mixed English and other language                      | 8 (29.6)                    | 25 (30.5)                      |
| Language other than English                           | 5 (18.5)                    | 10 (12.2)                      |

born <1250g - Online Supplementary Material

|                                                             |           |           |
|-------------------------------------------------------------|-----------|-----------|
| Not Married, No. (%)                                        | 2 (7.4)   | 5 (6.1)   |
| Family living below the poverty line <sup>4</sup> , No. (%) | 8 (25.8)  | 22 (23.4) |
| Morbidity composite <sup>5</sup> , No. (%)                  | 15 (48.4) | 37 (39.4) |
| Brain injury <sup>6</sup> , No. (%)                         | 5 (16.1)  | 14 (14.9) |

---

<sup>1</sup>Data are expressed as mean (SD) or frequency count (%). Baseline characteristics were compared between recruited participants with and without milk samples available for analysis using t-tests or Wilcoxon rank-sum tests and chi-square tests for continuous and categorical variables as appropriate.

<sup>2</sup>Gestational age determined using maternal estimates of last menstrual period. If early ultrasound prediction differed by two weeks or more, the gestational age estimate derived from early ultrasound was used.

<sup>3</sup>Score for Neonatal Acute Physiology II. Scores may range from 0 to 100 with higher values indicating higher neonatal risk and newborn illness.

<sup>4</sup>Based on 2012 Statistics Canada family size-adjusted cut-off values.

<sup>5</sup>Includes late-onset sepsis, chronic lung disease, necrotizing enterocolitis, retinopathy of prematurity requiring treatment.

<sup>6</sup>Includes echodense intraparenchymal lesions, periventricular leukomalacia, porencephalic cysts, or ventriculomegaly with or without intraventricular hemorrhage.

Appearance pulse grimace, activity respiration (Apgar), Human milk-based fortifier group (HMBF), Score for neonatal acute physiology (SNAP)

### Supplementary Figure 1: Participant flow diagram

Flow diagram of participants in the OptiMoM Fortifier trial. Infants were randomized to receive a human milk-based fortifier (HMBF) or a bovine milk-based fortifier (BMBF) added to an entirely human milk diet (mother's own or donor) during initial hospitalization.

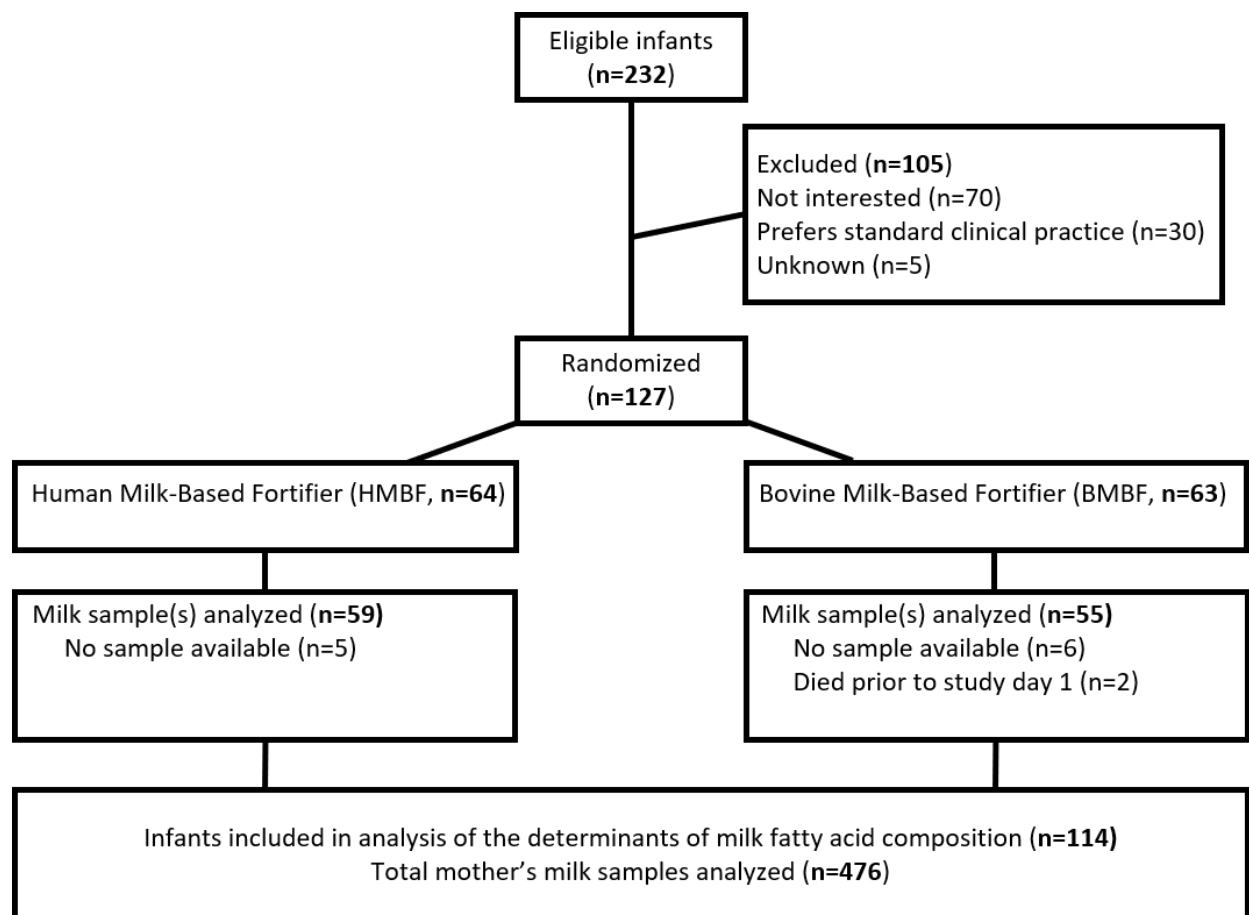

**Supplementary Figure 2: Distribution of samples included in analysis by period of postpartum collection**

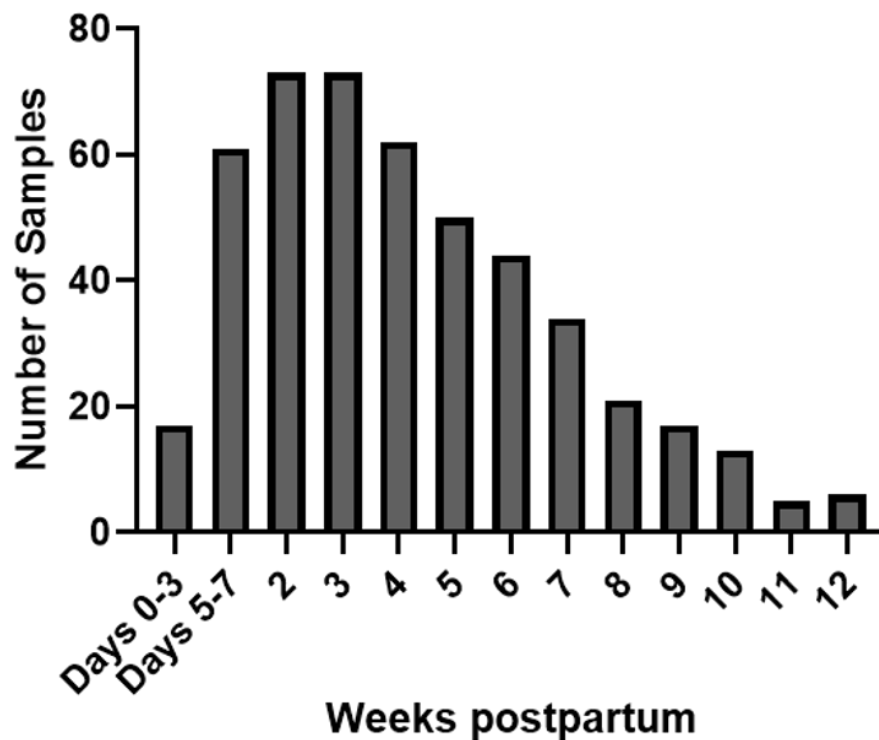

Supplement: nqab222_supplemental_file.pdf [file nqab222_supplemental_file.pdf]
